# Supplementary material for: Integration of 12-Hour Time-Restricted Feeding with Exercise Training Potentiates Weight Loss and Attenuates MASLD in Diet-Induced Obese Mice
Source: Research Square preprint supplement (doi:10.21203/rs.3.rs-8071932/v1), 2025-12-01
Supplement: Supplementary file 1 [file 8d1caa19f9f9c18a3e539a4e.pdf]

# Full data of the article

**Title:** *Integration of 12-Hour Time-Restricted Feeding with Exercise Training Potentiates Weight Loss and Attenuates MASLD in Diet-Induced Obese Mice*

**Corresponding author:** José Rodrigo Pauli  
Email: [rodrigopaulifca@gmail.com](mailto:rodrigopaulifca@gmail.com)

# Figure 2

**A.**

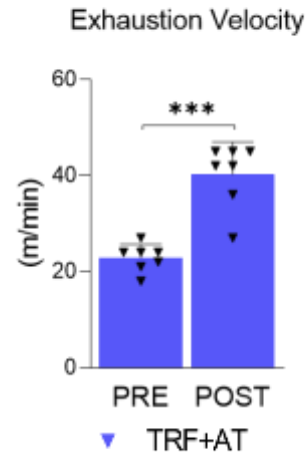

| PRE  | POST |
|------|------|
| 22.0 | 45.0 |
| 18.0 | 45.0 |
| 21.0 | 36.0 |
| 24.0 | 45.0 |
| 24.0 | 27.0 |
| 24.0 | 42.0 |
| 27.0 | 42.0 |

## Shapiro-Wilk test

|                                     |        |        |
|-------------------------------------|--------|--------|
| W                                   | 0.9462 | 0.7718 |
| P value                             | 0.6953 | 0.0213 |
| Passed normality test (alpha=0.05)? | Yes    | No     |
| P value summary                     | ns     | *      |

## Paired t test

|                                     |               |
|-------------------------------------|---------------|
| P value                             | 0.0010        |
| P value summary                     | ***           |
| Significantly different (P < 0.05)? | Yes           |
| One- or two-tailed P value?         | Two-tailed    |
| t, df                               | t=5.989, df=6 |
| Number of pairs                     | 7             |

**B.**

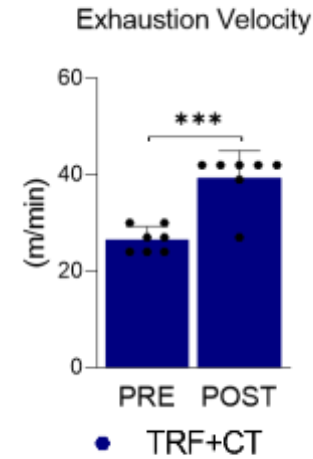

| PRE | POST |
|-----|------|
| 27  | 42   |
| 27  | 42   |
| 30  | 42   |
| 30  | 42   |
| 24  | 42   |
| 24  | 27   |
| 24  | 39   |

## Shapiro-Wilk test

|                                     |        |         |
|-------------------------------------|--------|---------|
| W                                   | 0.8181 | 0.5603  |
| P value                             | 0.0616 | <0.0001 |
| Passed normality test (alpha=0.05)? | Yes    | No      |
| P value summary                     | ns     | ****    |

## Paired t test

|                                     |               |
|-------------------------------------|---------------|
| P value                             | 0.0004        |
| P value summary                     | ***           |
| Significantly different (P < 0.05)? | Yes           |
| One- or two-tailed P value?         | Two-tailed    |
| t, df                               | t=7.071, df=6 |
| Number of pairs                     | 7             |

Figure 2

C.

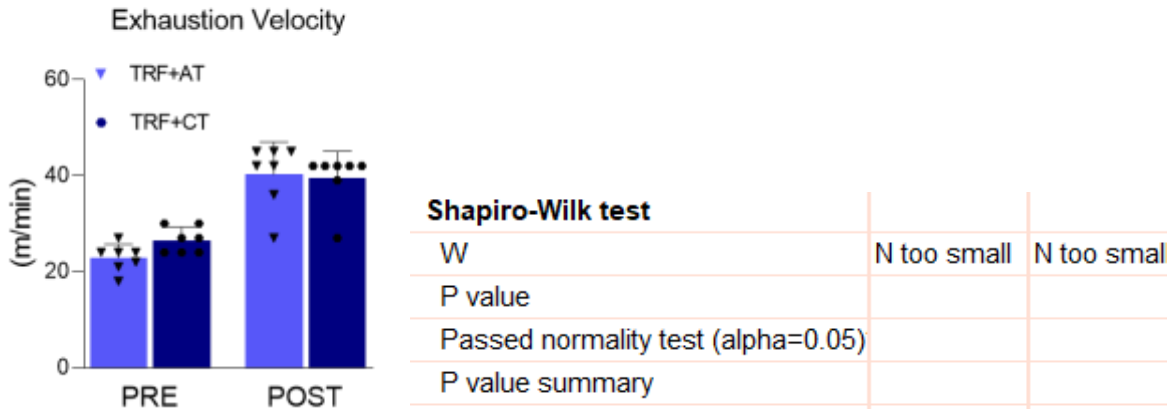

| TRF+AT |      |      |      |      |      |      |      |      |
|--------|------|------|------|------|------|------|------|------|
|        | A:Y1 | A:Y2 | A:Y3 | A:Y4 | A:Y5 | A:Y6 | A:Y7 | A:Y8 |
| PRE    | 22.0 | 18.0 | 21.0 | 24.0 | 24.0 | 24.0 | 27.0 |      |
| POST   | 45.0 | 45.0 | 36.0 | 45.0 | 27.0 | 42.0 | 42.0 |      |
|        |      |      |      |      |      |      |      |      |

| TRF+CT |      |      |      |      |      |      |      |      |
|--------|------|------|------|------|------|------|------|------|
|        | B:Y1 | B:Y2 | B:Y3 | B:Y4 | B:Y5 | B:Y6 | B:Y7 | B:Y8 |
| PRE    | 27   | 27   | 30   | 30   | 24   | 24   | 24   |      |
| POST   | 42   | 42   | 42   | 42   | 42   | 27   | 39   |      |

2way ANOVA  
Multiple comparisons

| Sidak's multiple con | Mean Diff. | 95.00% CI of diff. | Significant? | Summary | Adjusted P Value |
|----------------------|------------|--------------------|--------------|---------|------------------|
| TRA+AT - TRA+CT      |            |                    |              |         |                  |
| PRE                  | -3.714     | -9.805 to 2.376    | No           | ns      | 0.2923           |
| POST                 | 0.8571     | -5.233 to 6.948    | No           | ns      | 0.9324           |

D.

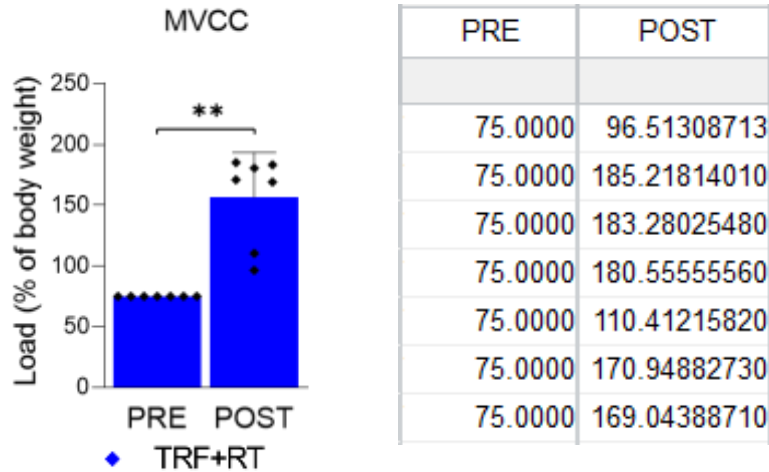

| Shapiro-Wilk test                   |                    |        |
|-------------------------------------|--------------------|--------|
| W                                   | Invalid input data | 0.7598 |
| P value                             |                    | 0.0161 |
| Passed normality test (alpha=0.05)? |                    | No     |
| P value summary                     |                    | *      |

| Paired t test                       |               |
|-------------------------------------|---------------|
| P value                             | 0.0011        |
| P value summary                     | **            |
| Significantly different (P < 0.05)? | Yes           |
| One- or two-tailed P value?         | Two-tailed    |
| t, df                               | t=5.834, df=6 |
| Number of pairs                     | 7             |

# Figure 2

E.

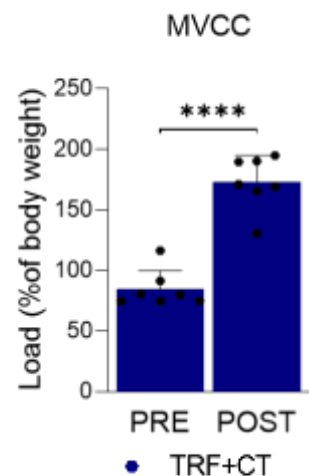

| PRE          | POST         |
|--------------|--------------|
| 80.26685393  | 171.29629630 |
| 75.00000000  | 131.13305610 |
| 91.47748078  | 194.89342810 |
| 116.37217720 | 189.64199520 |
| 75.00000000  | 190.28028930 |
| 75.00000000  | 169.48818900 |
| 80.90086546  | 166.00101110 |

## Shapiro-Wilk test

|                                     |        |        |
|-------------------------------------|--------|--------|
| W                                   | 0.7317 | 0.8682 |
| P value                             | 0.0081 | 0.1791 |
| Passed normality test (alpha=0.05)? | No     | Yes    |
| P value summary                     | **     | ns     |

## Paired t test

|                                     |               |
|-------------------------------------|---------------|
| P value                             | <0.0001       |
| P value summary                     | ****          |
| Significantly different (P < 0.05)? | Yes           |
| One- or two-tailed P value?         | Two-tailed    |
| t, df                               | t=12.01, df=6 |
| Number of pairs                     | 7             |

F.

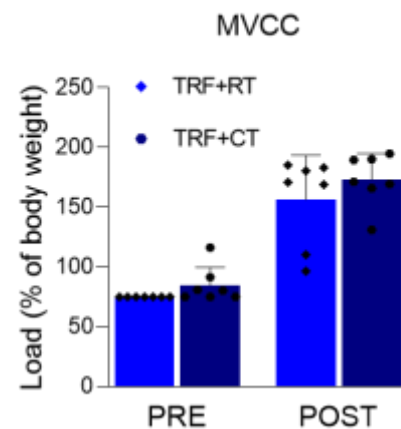

## Shapiro-Wilk test

|                                     |             |             |
|-------------------------------------|-------------|-------------|
| W                                   | N too small | N too small |
| P value                             |             |             |
| Passed normality test (alpha=0.05)? |             |             |
| P value summary                     |             |             |

|      |  | TRF+RT      |             |             |             |             |             |             |      |
|------|--|-------------|-------------|-------------|-------------|-------------|-------------|-------------|------|
|      |  | A:Y1        | A:Y2        | A:Y3        | A:Y4        | A:Y5        | A:Y6        | A:Y7        | A:Y8 |
| PRE  |  | 75.00000000 | 75.00000000 | 75.00000000 | 75.00000000 | 75.00000000 | 75.00000000 | 75.00000000 |      |
| POST |  | 96.51308713 | 185.2181401 | 183.2802548 | 180.5555556 | 110.4121582 | 170.9488273 | 169.0438871 |      |

  

|      |  | TRF+CT       |              |              |              |             |             |              |      |
|------|--|--------------|--------------|--------------|--------------|-------------|-------------|--------------|------|
|      |  | B:Y1         | B:Y2         | B:Y3         | B:Y4         | B:Y5        | B:Y6        | B:Y7         | B:Y8 |
| PRE  |  | 80.26685393  | 75.00000000  | 91.47748078  | 116.37217720 | 75.00000000 | 75.00000000 | 80.90086546  |      |
| POST |  | 171.29629630 | 131.13305610 | 194.89342810 | 189.64199520 | 190.2802893 | 169.4881890 | 166.00101110 |      |

## 2way ANOVA

### Multiple comparisons

| Sidak's multiple con | Mean Diff. | 95.00% CI of diff. | Significant? | Summary | Adjusted P Value |
|----------------------|------------|--------------------|--------------|---------|------------------|
| TRF+RT - TRF+CT      |            |                    |              |         |                  |
| PRÉ                  | -9.860     | -38.89 to 19.17    | No           | ns      | 0.6704           |
| PÓS                  | -16.68     | -45.71 to 12.35    | No           | ns      | 0.3329           |

Figure 2

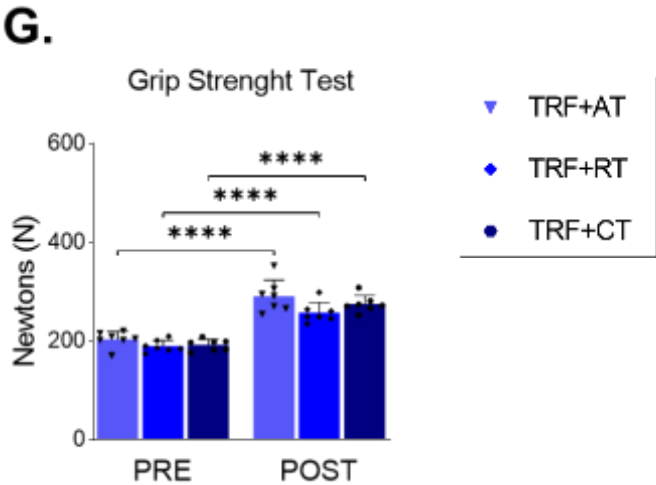

| TRF+AT  |          |         |         |         |         |         |
|---------|----------|---------|---------|---------|---------|---------|
| D:Y2    | D:Y3     | D:Y4    | D:Y5    | D:Y6    | D:Y7    | D:Y8    |
| 209.333 | 220.6670 | 215.667 | 202.333 | 205.000 | 170.667 | 202.333 |
| 291.000 | 266.3333 | 352.667 | 270.667 | 295.000 | 254.667 | 306.000 |

| TRF+RT   |          |          |          |          |          |          |
|----------|----------|----------|----------|----------|----------|----------|
| E:Y2     | E:Y3     | E:Y4     | E:Y5     | E:Y6     | E:Y7     | E:Y8     |
| 184.3330 | 174.0000 | 201.3330 | 209.6670 | 186.0000 | 182.0000 | 190.3330 |
| 245.6667 | 264.3333 | 235.0000 | 249.3333 | 249.3333 | 260.6667 | 298.6667 |

| TRF+CT   |          |          |          |          |          |          |
|----------|----------|----------|----------|----------|----------|----------|
| F:Y2     | F:Y3     | F:Y4     | F:Y5     | F:Y6     | F:Y7     | F:Y8     |
| 198.0000 | 199.0000 | 208.6670 | 176.3330 | 197.0000 | 182.3330 | 182.6670 |
| 267.3333 | 308.0000 | 270.6667 | 252.6667 | 272.3333 | 274.3333 | 281.3333 |

| Sidak's multiple comparisons test | Mean Diff. | 95.00% CI of diff. | Significant? | Summary | Adjusted P Value |
|-----------------------------------|------------|--------------------|--------------|---------|------------------|
| PRÉ - PÓS                         |            |                    |              |         |                  |
| TRF+AT                            | -87.19     | -113.5 to -60.90   | Yes          | ****    | <0.0001          |
| TRF+RT                            | -67.90     | -94.19 to -41.62   | Yes          | ****    | <0.0001          |
| TRF+CT                            | -83.24     | -109.5 to -56.95   | Yes          | ****    | <0.0001          |

# Figure 3

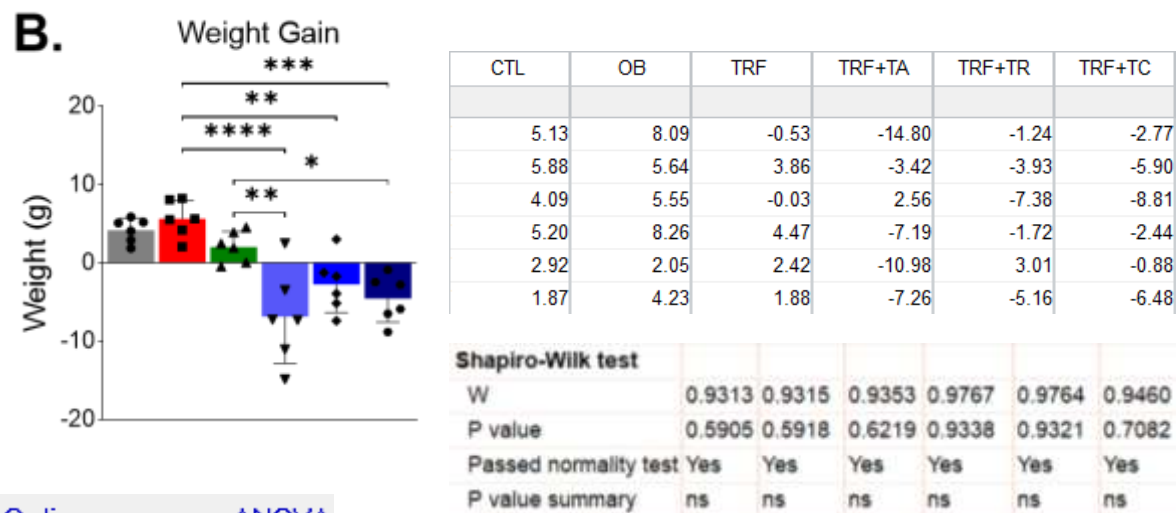

Ordinary one-way ANOVA  
ANOVA results

| Tukey's multiple comp | Mean Diff. | 95.00% CI of diff. | Significant? | Summary |
|-----------------------|------------|--------------------|--------------|---------|
| CTL vs. OB            | -1.455     | -7.458 to 4.548    | No           | ns      |
| CTL vs. TRF           | 2.170      | -3.833 to 8.173    | No           | ns      |
| CTL vs. TRF+AT        | 11.03      | 5.027 to 17.03     | Yes          | ****    |
| CTL vs. TRF+RT        | 6.918      | 0.9152 to 12.92    | Yes          | *       |
| CTL vs. TRF+CT        | 8.728      | 2.725 to 14.73     | Yes          | **      |
| OB vs. TRF            | 3.625      | -2.378 to 9.628    | No           | ns      |
| OB vs. TRF+AT         | 12.49      | 6.482 to 18.49     | Yes          | ****    |
| OB vs. TRF+RT         | 8.373      | 2.370 to 14.38     | Yes          | **      |
| OB vs. TRF+CT         | 10.18      | 4.180 to 16.19     | Yes          | ***     |
| TRF vs. TRF+AT        | 8.860      | 2.857 to 14.86     | Yes          | **      |
| TRF vs. TRF+RT        | 4.748      | -1.255 to 10.75    | No           | ns      |
| TRF vs. TRF+CT        | 6.558      | 0.5552 to 12.56    | Yes          | *       |
| TRF+AT vs. TRF+RT     | -4.112     | -10.11 to 1.891    | No           | ns      |
| TRF+AT vs. TRF+CT     | -2.302     | -8.305 to 3.701    | No           | ns      |
| TRF+RT vs. TRF+CT     | 1.810      | -4.193 to 7.813    | No           | ns      |

**D. Cumulative Food Intake**

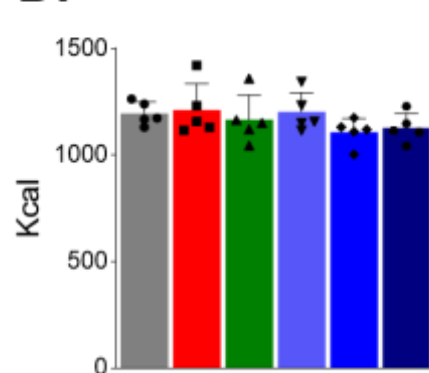

|  | CTL        | OB         | TRF        | TRF+TA     | TRF+TR     | TRF+TC     |
|--|------------|------------|------------|------------|------------|------------|
|  | 1131.32316 | 1158.23886 | 1043.04186 | 1159.20330 | 1003.55340 | 1042.77396 |
|  | 1263.93234 | 1421.79888 | 1119.66126 | 1153.30950 | 1175.27730 | 1229.28594 |
|  | 1169.73120 | 1117.35732 | 1358.57448 | 1346.78688 | 1131.55602 | 1147.57644 |
|  | 1174.83828 | 1231.75062 | 1162.84674 | 1118.21460 | 1110.55266 | 1107.87366 |
|  | 1241.19534 | 1130.00220 | 1149.93396 | 1235.98344 | 1121.10792 | 1115.69634 |

| Shapiro-Wilk test     |        |        |        |        |        |        |
|-----------------------|--------|--------|--------|--------|--------|--------|
| W                     | 0.9272 | 0.8175 | 0.8873 | 0.8861 | 0.8789 | 0.9661 |
| P value               | 0.5774 | 0.1117 | 0.3438 | 0.3378 | 0.3043 | 0.8498 |
| Passed normality test | Yes    | Yes    | Yes    | Yes    | Yes    | Yes    |
| P value summary       | ns     | ns     | ns     | ns     | ns     | ns     |

Ordinary one-way ANOVA  
ANOVA results

| Tukey's multiple comp | Mean Diff. | 95.00% CI of diff. | Significant? | Summary |
|-----------------------|------------|--------------------|--------------|---------|
| CTL vs. OB            | -15.63     | -193.0 to 161.8    | No           | ns      |
| CTL vs. TRF           | 29.39      | -148.0 to 206.8    | No           | ns      |
| CTL vs. TRF+AT        | -6.495     | -183.9 to 170.9    | No           | ns      |
| CTL vs. TRF+RT        | 87.79      | -89.62 to 265.2    | No           | ns      |
| CTL vs. TRF+CT        | 67.56      | -109.8 to 245.0    | No           | ns      |
| OB vs. TRF            | 45.02      | -132.4 to 222.4    | No           | ns      |
| OB vs. TRF+AT         | 9.130      | -168.3 to 186.5    | No           | ns      |
| OB vs. TRF+RT         | 103.4      | -73.99 to 280.8    | No           | ns      |
| OB vs. TRF+CT         | 83.19      | -94.22 to 260.6    | No           | ns      |
| TRF vs. TRF+AT        | -35.89     | -213.3 to 141.5    | No           | ns      |
| TRF vs. TRF+RT        | 58.40      | -119.0 to 235.8    | No           | ns      |
| TRF vs. TRF+CT        | 38.17      | -139.2 to 215.6    | No           | ns      |
| TRF+AT vs. TRF+RT     | 94.29      | -83.12 to 271.7    | No           | ns      |
| TRF+AT vs. TRF+CT     | 74.06      | -103.4 to 251.5    | No           | ns      |
| TRF+RT vs. TRF+CT     | -20.23     | -197.6 to 157.2    | No           | ns      |

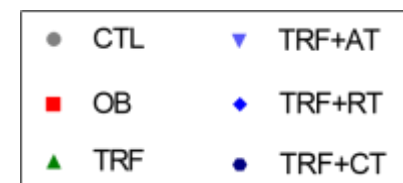

Figure 3

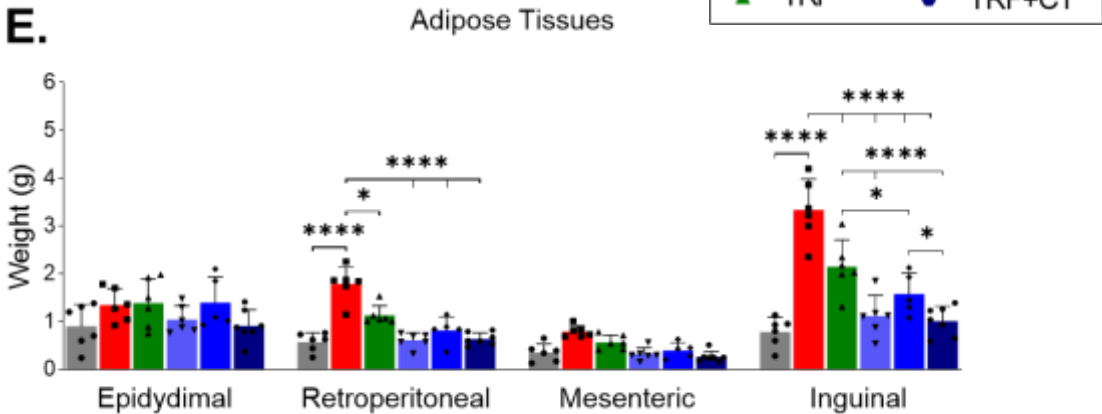

| XY              | X Title | CTL  |      |      |      |      |      |      |
|-----------------|---------|------|------|------|------|------|------|------|
|                 | X       | A:Y1 | A:Y2 | A:Y3 | A:Y4 | A:Y5 | A:Y6 | A:Y7 |
| Epididymal      |         | 1.31 | 0.70 | 0.60 | 1.38 | 1.20 | 0.24 |      |
| Retroperitoneal |         | 0.62 | 0.63 | 0.44 | 0.73 | 0.76 | 0.25 |      |
| Mesenteric      |         | 0.34 | 0.39 | 0.13 | 0.65 | 0.42 | 0.17 |      |
| Inguinal        |         | 0.95 | 0.80 | 0.60 | 1.14 | 0.93 | 0.28 |      |

| XY              | X Title | OB   |      |      |      |      |      |
|-----------------|---------|------|------|------|------|------|------|
|                 | X       | B:Y2 | B:Y3 | B:Y4 | B:Y5 | B:Y6 | B:Y7 |
| Epididymal      |         | 0.92 | 1.04 | 1.36 | 1.78 | 1.70 |      |
| Retroperitoneal |         | 1.15 | 2.26 | 1.86 | 1.87 | 1.84 |      |
| Mesenteric      |         | 0.81 | 0.69 | 0.83 | 1.01 | 0.73 |      |
| Inguinal        |         | 3.37 | 4.20 | 3.22 | 3.86 | 2.36 |      |

| XY              | X Title | TRF  |      |      |      |      |      |      |
|-----------------|---------|------|------|------|------|------|------|------|
|                 | X       | C:Y1 | C:Y2 | C:Y3 | C:Y4 | C:Y5 | C:Y6 | C:Y7 |
| Epididymal      |         | 0.75 | 1.50 | 1.28 | 1.98 | 1.92 | 0.89 |      |
| Retroperitoneal |         | 1.07 | 1.13 | 1.05 | 1.53 | 1.01 | 1.01 |      |
| Mesenteric      |         | 0.41 | 0.55 | 0.78 | 0.71 | 0.54 | 0.42 |      |
| Inguinal        |         | 2.35 | 1.99 | 2.03 | 3.04 | 1.31 | 2.18 |      |

| XY              | X Title | TRF+AT |      |      |      |      |      |      |
|-----------------|---------|--------|------|------|------|------|------|------|
|                 | X       | D:Y1   | D:Y2 | D:Y3 | D:Y4 | D:Y5 | D:Y6 | D:Y7 |
| Epididymal      |         | 1.02   | 0.88 | 1.30 | 0.82 | 0.77 | 1.48 |      |
| Retroperitoneal |         | 0.33   | 0.76 | 0.71 | 0.58 | 0.58 | 0.70 |      |
| Mesenteric      |         | 0.16   | 0.57 | 0.29 | 0.33 | 0.30 | 0.30 |      |
| Inguinal        |         | 0.54   | 1.85 | 1.13 | 1.11 | 0.88 | 1.18 |      |

| XY              | X Title | TRF+RT |      |      |      |      |      |      |
|-----------------|---------|--------|------|------|------|------|------|------|
|                 | X       | E:Y1   | E:Y2 | E:Y3 | E:Y4 | E:Y5 | E:Y6 | E:Y7 |
| Epididymal      |         | 1.02   | 1.09 | 0.93 | 1.85 | 2.10 |      |      |
| Retroperitoneal |         | 0.84   | 1.15 | 0.84 | 0.89 | 0.36 |      |      |
| Mesenteric      |         | 0.20   | 0.28 | 0.45 | 0.43 | 0.63 |      |      |
| Inguinal        |         | 1.30   | 1.93 | 2.13 | 1.45 | 1.08 |      |      |

| XY              | X Title | TRF+CT |      |      |      |      |      |      |
|-----------------|---------|--------|------|------|------|------|------|------|
|                 | X       | F:Y1   | F:Y2 | F:Y3 | F:Y4 | F:Y5 | F:Y6 | F:Y7 |
| Epididymal      |         | 0.79   | 0.91 | 0.88 | 0.79 | 0.37 | 1.41 | 1.24 |
| Retroperitoneal |         | 0.47   | 0.59 | 0.79 | 0.60 | 0.67 | 0.53 | 0.82 |
| Mesenteric      |         | 0.26   | 0.51 | 0.18 | 0.25 | 0.17 | 0.25 | 0.24 |
| Inguinal        |         | 0.65   | 1.04 | 1.23 | 0.94 | 1.39 | 0.59 | 1.26 |



# Figure 3

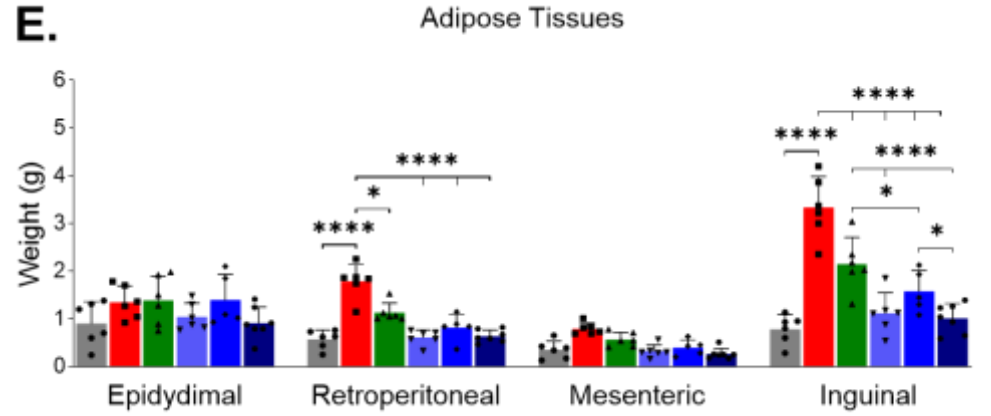

| Shapiro-Wilk test     |        |        |        |        |        |        |
|-----------------------|--------|--------|--------|--------|--------|--------|
| W                     | 0.9702 | 0.9266 | 0.9863 | 0.9052 | 0.9372 | 0.9468 |
| P value               | 0.8429 | 0.5744 | 0.9377 | 0.4575 | 0.6371 | 0.6964 |
| Passed normality test | Yes    | Yes    | Yes    | Yes    | Yes    | Yes    |
| P value summary       | ns     | ns     | ns     | ns     | ns     | ns     |

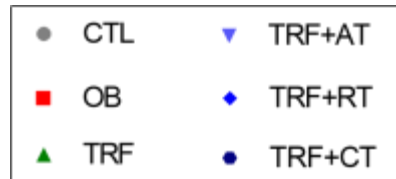

**2way ANOVA**  
Multiple comparisons

| Tukey's multiple comp | Mean Diff. | 95.00% CI of diff. | Significant? | Summary |
|-----------------------|------------|--------------------|--------------|---------|
| Epididymal            |            |                    |              |         |
| CTL vs. OB            | -0.4400    | -1.007 to 0.1274   | No           | ns      |
| CTL vs. TRF           | -0.4817    | -1.049 to 0.08573  | No           | ns      |
| CTL vs. TRF+AT        | -0.1400    | -0.7074 to 0.4274  | No           | ns      |
| CTL vs. TRF+RT        | -0.4667    | -1.034 to 0.1007   | No           | ns      |
| CTL vs. TRF+CT        | 0.04667    | -0.5207 to 0.6141  | No           | ns      |
| OB vs. TRF            | -0.04167   | -0.6091 to 0.5257  | No           | ns      |
| OB vs. TRF+AT         | 0.3000     | -0.2674 to 0.8674  | No           | ns      |
| OB vs. TRF+RT         | -0.02667   | -0.5941 to 0.5407  | No           | ns      |
| OB vs. TRF+CT         | 0.4867     | -0.08073 to 1.054  | No           | ns      |
| TRF vs. TRF+AT        | 0.3417     | -0.2257 to 0.9091  | No           | ns      |
| TRF vs. TRF+RT        | 0.01500    | -0.5524 to 0.5824  | No           | ns      |
| TRF vs. TRF+CT        | 0.5283     | -0.03906 to 1.096  | No           | ns      |
| TRF+AT vs. TRF+RT     | -0.3267    | -0.8941 to 0.2407  | No           | ns      |
| TRF+AT vs. TRF+CT     | 0.1867     | -0.3807 to 0.7541  | No           | ns      |
| TRF+RT vs. TRF+CT     | 0.5133     | -0.05406 to 1.081  | No           | ns      |

**2way ANOVA**  
Multiple comparisons

| Tukey's multiple comp | Mean Diff. | 95.00% CI of diff. | Significant? | Summary |
|-----------------------|------------|--------------------|--------------|---------|
| Mesenteric            |            |                    |              |         |
| CTL vs. OB            | -0.4433    | -1.011 to 0.1241   | No           | ns      |
| CTL vs. TRF           | -0.2183    | -0.7857 to 0.3491  | No           | ns      |
| CTL vs. TRF+AT        | 0.02500    | -0.5424 to 0.5924  | No           | ns      |
| CTL vs. TRF+RT        | -0.1167    | -0.6841 to 0.4507  | No           | ns      |
| CTL vs. TRF+CT        | 0.08000    | -0.4874 to 0.6474  | No           | ns      |
| OB vs. TRF            | 0.2250     | -0.3424 to 0.7924  | No           | ns      |
| OB vs. TRF+AT         | 0.4683     | -0.09906 to 1.036  | No           | ns      |
| OB vs. TRF+RT         | 0.3267     | -0.2407 to 0.8941  | No           | ns      |
| OB vs. TRF+CT         | 0.5233     | -0.04406 to 1.091  | No           | ns      |
| TRF vs. TRF+AT        | 0.2433     | -0.3241 to 0.8107  | No           | ns      |
| TRF vs. TRF+RT        | 0.1017     | -0.4657 to 0.6691  | No           | ns      |
| TRF vs. TRF+CT        | 0.2983     | -0.2691 to 0.8657  | No           | ns      |
| TRF+AT vs. TRF+RT     | -0.1417    | -0.7091 to 0.4257  | No           | ns      |
| TRF+AT vs. TRF+CT     | 0.05500    | -0.5124 to 0.6224  | No           | ns      |
| TRF+RT vs. TRF+CT     | 0.1967     | -0.3707 to 0.7641  | No           | ns      |

**2way ANOVA**  
Multiple comparisons

| Tukey's multiple comp | Mean Diff. | 95.00% CI of diff. | Significant? | Summary |
|-----------------------|------------|--------------------|--------------|---------|
| Retroperitoneal       |            |                    |              |         |
| CTL vs. OB            | -1.215     | -1.782 to -0.6476  | Yes          | ****    |
| CTL vs. TRF           | -0.5617    | -1.129 to 0.005727 | No           | ns      |
| CTL vs. TRF+AT        | -0.03833   | -0.6057 to 0.5291  | No           | ns      |
| CTL vs. TRF+RT        | -0.2633    | -0.8307 to 0.3041  | No           | ns      |
| CTL vs. TRF+CT        | -0.03667   | -0.6041 to 0.5307  | No           | ns      |
| OB vs. TRF            | 0.6533     | 0.08594 to 1.221   | Yes          | *       |
| OB vs. TRF+AT         | 1.177      | 0.6093 to 1.744    | Yes          | ****    |
| OB vs. TRF+RT         | 0.9517     | 0.3843 to 1.519    | Yes          | ****    |
| OB vs. TRF+CT         | 1.178      | 0.6109 to 1.746    | Yes          | ****    |
| TRF vs. TRF+AT        | 0.5233     | -0.04406 to 1.091  | No           | ns      |
| TRF vs. TRF+RT        | 0.2983     | -0.2691 to 0.8657  | No           | ns      |
| TRF vs. TRF+CT        | 0.5250     | -0.04239 to 1.092  | No           | ns      |
| TRF+AT vs. TRF+RT     | -0.2250    | -0.7924 to 0.3424  | No           | ns      |
| TRF+AT vs. TRF+CT     | 0.001667   | -0.5657 to 0.5691  | No           | ns      |
| TRF+RT vs. TRF+CT     | 0.2267     | -0.3407 to 0.7941  | No           | ns      |

**2way ANOVA**  
Multiple comparisons

| Tukey's multiple comp | Mean Diff. | 95.00% CI of diff. | Significant? | Summary |
|-----------------------|------------|--------------------|--------------|---------|
| Inguinal              |            |                    |              |         |
| CTL vs. OB            | -2.552     | -3.119 to -1.984   | Yes          | ****    |
| CTL vs. TRF           | -1.367     | -1.934 to -0.7993  | Yes          | ****    |
| CTL vs. TRF+AT        | -0.3317    | -0.8991 to 0.2357  | No           | ns      |
| CTL vs. TRF+RT        | -0.7582    | -1.326 to -0.1908  | Yes          | **      |
| CTL vs. TRF+CT        | -0.1900    | -0.7574 to 0.3774  | No           | ns      |
| OB vs. TRF            | 1.185      | 0.6176 to 1.752    | Yes          | ****    |
| OB vs. TRF+AT         | 2.220      | 1.653 to 2.787     | Yes          | ****    |
| OB vs. TRF+RT         | 1.794      | 1.226 to 2.361     | Yes          | ****    |
| OB vs. TRF+CT         | 2.362      | 1.794 to 2.929     | Yes          | ****    |
| TRF vs. TRF+AT        | 1.035      | 0.4676 to 1.602    | Yes          | ****    |
| TRF vs. TRF+RT        | 0.6085     | 0.04111 to 1.176   | Yes          | *       |
| TRF vs. TRF+CT        | 1.177      | 0.6093 to 1.744    | Yes          | ****    |
| TRF+AT vs. TRF+RT     | -0.4265    | -0.9939 to 0.1409  | No           | ns      |
| TRF+AT vs. TRF+CT     | 0.1417     | -0.4257 to 0.7091  | No           | ns      |
| TRF+RT vs. TRF+CT     | 0.5682     | 0.0007730 to 1.13  | Yes          | *       |



# Figure 3

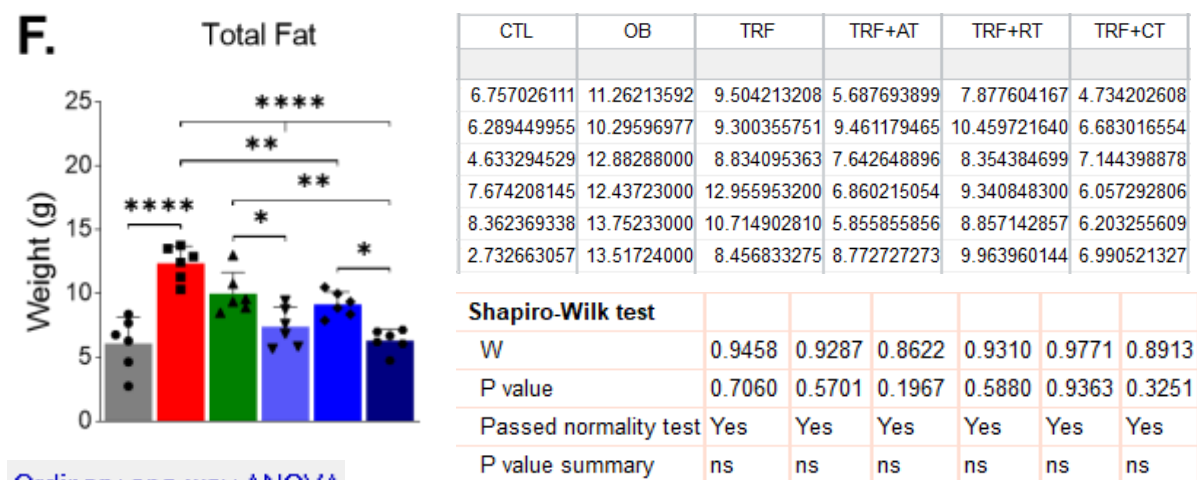

Ordinary one-way ANOVA  
ANOVA results

| Tukey's multiple com | Mean Diff. | 95.00% CI of diff. | Significant? | Summary |
|----------------------|------------|--------------------|--------------|---------|
| CTL vs. OB           | -6.283     | -8.862 to -3.704   | Yes          | ****    |
| CTL vs. TRF          | -3.886     | -6.465 to -1.307   | Yes          | ***     |
| CTL vs. TRF+AT       | -1.305     | -3.884 to 1.274    | No           | ns      |
| CTL vs. TRF+RT       | -3.067     | -5.646 to -0.4887  | Yes          | *       |
| CTL vs. TRF+CT       | -0.2273    | -2.806 to 2.351    | No           | ns      |
| OB vs. TRF           | 2.397      | -0.1819 to 4.976   | No           | ns      |
| OB vs. TRF+AT        | 4.978      | 2.399 to 7.557     | Yes          | ****    |
| OB vs. TRF+RT        | 3.216      | 0.6369 to 5.794    | Yes          | ***     |
| OB vs. TRF+CT        | 6.056      | 3.477 to 8.635     | Yes          | ****    |
| TRF vs. TRF+AT       | 2.581      | 0.002239 to 5.160  | Yes          | *       |
| TRF vs. TRF+RT       | 0.8188     | -1.760 to 3.398    | No           | ns      |
| TRF vs. TRF+CT       | 3.659      | 1.080 to 6.238     | Yes          | **      |
| TRF+AT vs. TRF+RT    | -1.762     | -4.341 to 0.8165   | No           | ns      |
| TRF+AT vs. TRF+CT    | 1.078      | -1.501 to 3.657    | No           | ns      |
| TRF+RT vs. TRF+CT    | 2.840      | 0.2614 to 5.419    | Yes          | *       |

- CTL
- OB
- ▲ TRF
- ▼ TRF+AT
- ◆ TRF+RT
- TRF+CT

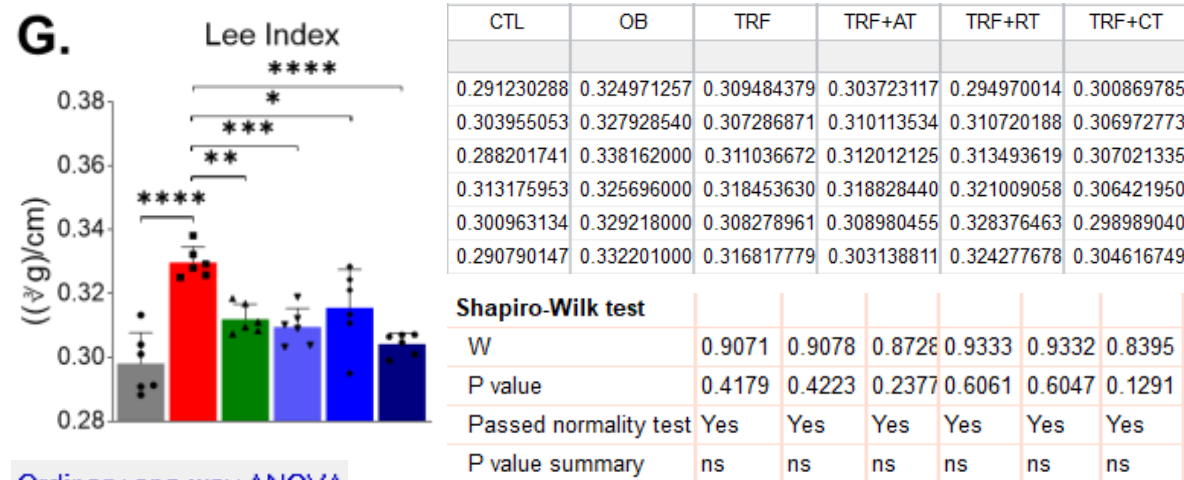

Ordinary one-way ANOVA  
ANOVA results

| Tukey's multiple com | Mean Diff. | 95.00% CI of diff.     | Significant? | Summary |
|----------------------|------------|------------------------|--------------|---------|
| CTL vs. OB           | -0.03164   | -0.04464 to -0.01864   | Yes          | ****    |
| CTL vs. TRF          | -0.01384   | -0.02684 to -0.0008390 | Yes          | *       |
| CTL vs. TRF+AT       | -0.01141   | -0.02441 to 0.001588   | No           | ns      |
| CTL vs. TRF+RT       | -0.01742   | -0.03042 to -0.004420  | Yes          | **      |
| CTL vs. TRF+CT       | -0.006096  | -0.01910 to 0.006905   | No           | ns      |
| OB vs. TRF           | 0.01780    | 0.004802 to 0.03080    | Yes          | **      |
| OB vs. TRF+AT        | 0.02023    | 0.007229 to 0.03323    | Yes          | ****    |
| OB vs. TRF+RT        | 0.01422    | 0.001220 to 0.02722    | Yes          | *       |
| OB vs. TRF+CT        | 0.02555    | 0.01255 to 0.03855     | Yes          | ****    |
| TRF vs. TRF+AT       | 0.002427   | -0.01057 to 0.01543    | No           | ns      |
| TRF vs. TRF+RT       | -0.003581  | -0.01658 to 0.009420   | No           | ns      |
| TRF vs. TRF+CT       | 0.007744   | -0.005257 to 0.02075   | No           | ns      |
| TRF+AT vs. TRF+RT    | -0.006008  | -0.01901 to 0.006993   | No           | ns      |
| TRF+AT vs. TRF+CT    | 0.005317   | -0.007684 to 0.01832   | No           | ns      |
| TRF+RT vs. TRF+CT    | 0.01133    | -0.001675 to 0.02433   | No           | ns      |

# Figure 3

## H. Fasting Blood Glucose

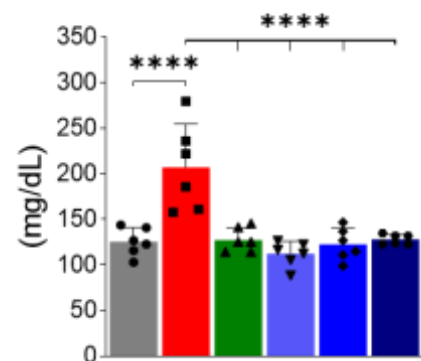

| CTL | OB  | TRF | TRF+AT | TRF+RT | TRF+CT |
|-----|-----|-----|--------|--------|--------|
| 116 | 158 | 114 | 89     | 147    | 123    |
| 144 | 186 | 145 | 106    | 115    | 132    |
| 141 | 236 | 141 | 127    | 137    | 135    |
| 123 | 161 | 125 | 113    | 111    | 124    |
| 127 | 280 | 114 | 117    | 127    | 132    |
| 103 | 222 | 125 | 123    | 99     | 123    |

| Shapiro-Wilk test     |        |        |        |        |        |        |
|-----------------------|--------|--------|--------|--------|--------|--------|
| W                     | 0.9584 | 0.9286 | 0.8747 | 0.9339 | 0.9789 | 0.8163 |
| P value               | 0.8070 | 0.5690 | 0.2454 | 0.6107 | 0.9461 | 0.0820 |
| Passed normality test | Yes    | Yes    | Yes    | Yes    | Yes    | Yes    |
| P value summary       | ns     | ns     | ns     | ns     | ns     | ns     |

### Ordinary one-way ANOVA ANOVA results

| Tukey's multiple com | Mean Diff. | 95.00% CI of diff. | Significant? | Summary |
|----------------------|------------|--------------------|--------------|---------|
| CTL vs. OB           | -81.50     | -122.1 to -40.87   | Yes          | ****    |
| CTL vs. TRF          | -1.667     | -42.30 to 38.96    | No           | ns      |
| CTL vs. TRF+AT       | 13.17      | -27.46 to 53.80    | No           | ns      |
| CTL vs. TRF+RT       | 3.000      | -37.63 to 43.63    | No           | ns      |
| CTL vs. TRF+CT       | -2.500     | -43.13 to 38.13    | No           | ns      |
| OB vs. TRF           | 79.83      | 39.20 to 120.5     | Yes          | ****    |
| OB vs. TRF+AT        | 94.67      | 54.04 to 135.3     | Yes          | ****    |
| OB vs. TRF+RT        | 84.50      | 43.87 to 125.1     | Yes          | ****    |
| OB vs. TRF+CT        | 79.00      | 38.37 to 119.6     | Yes          | ****    |
| TRF vs. TRF+AT       | 14.83      | -25.80 to 55.46    | No           | ns      |
| TRF vs. TRF+RT       | 4.667      | -35.96 to 45.30    | No           | ns      |
| TRF vs. TRF+CT       | -0.8333    | -41.46 to 39.80    | No           | ns      |
| TRF+AT vs. TRF+RT    | -10.17     | -50.80 to 30.46    | No           | ns      |
| TRF+AT vs. TRF+CT    | -15.67     | -56.30 to 24.96    | No           | ns      |
| TRF+RT vs. TRF+CT    | -5.500     | -46.13 to 35.13    | No           | ns      |

- CTL
- OB
- ▲ TRF
- ▼ TRF+AT
- ◆ TRF+RT
- TRF+CT

## I. Postprandial Blood Glucose

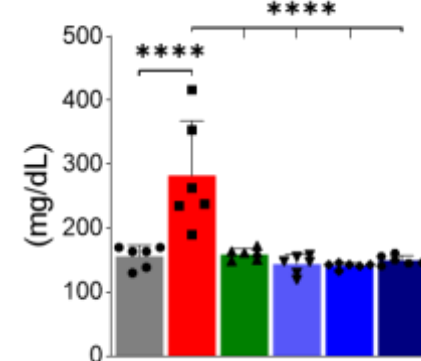

| CTL | OB  | TRF | TRF+AT | TRF+RT | TRF+CT |
|-----|-----|-----|--------|--------|--------|
| 170 | 263 | 172 | 131    | 143    | 156    |
| 170 | 190 | 148 | 148    | 133    | 161    |
| 139 | 417 | 163 | 120    | 143    | 141    |
| 164 | 354 | 161 | 149    | 143    | 145    |
| 164 | 238 | 150 | 156    | 146    | 146    |
| 130 | 235 | 161 | 159    | 141    | 150    |

| Shapiro-Wilk test     |        |        |        |        |        |        |
|-----------------------|--------|--------|--------|--------|--------|--------|
| W                     | 0.7979 | 0.9063 | 0.9221 | 0.8968 | 0.7997 | 0.9529 |
| P value               | 0.0563 | 0.4124 | 0.5205 | 0.3555 | 0.0584 | 0.7636 |
| Passed normality test | Yes    | Yes    | Yes    | Yes    | Yes    | Yes    |
| P value summary       | ns     | ns     | ns     | ns     | ns     | ns     |

### Ordinary one-way ANOVA ANOVA results

| Tukey's multiple com | Mean Diff. | 95.00% CI of diff. | Significant? | Summary |
|----------------------|------------|--------------------|--------------|---------|
| CTL vs. OB           | -126.7     | -190.6 to -62.71   | Yes          | ****    |
| CTL vs. TRF          | -3.000     | -66.95 to 60.95    | No           | ns      |
| CTL vs. TRF+AT       | 12.33      | -51.62 to 76.29    | No           | ns      |
| CTL vs. TRF+RT       | 14.67      | -49.29 to 78.62    | No           | ns      |
| CTL vs. TRF+CT       | 6.333      | -57.62 to 70.29    | No           | ns      |
| OB vs. TRF           | 123.7      | 59.71 to 187.6     | Yes          | ****    |
| OB vs. TRF+AT        | 139.0      | 75.05 to 203.0     | Yes          | ****    |
| OB vs. TRF+RT        | 141.3      | 77.38 to 205.3     | Yes          | ****    |
| OB vs. TRF+CT        | 133.0      | 69.05 to 197.0     | Yes          | ****    |
| TRF vs. TRF+AT       | 15.33      | -48.62 to 79.29    | No           | ns      |
| TRF vs. TRF+RT       | 17.67      | -46.29 to 81.62    | No           | ns      |
| TRF vs. TRF+CT       | 9.333      | -54.62 to 73.29    | No           | ns      |
| TRF+AT vs. TRF+RT    | 2.333      | -61.62 to 66.29    | No           | ns      |
| TRF+AT vs. TRF+CT    | -6.000     | -69.95 to 57.95    | No           | ns      |
| TRF+RT vs. TRF+CT    | -8.333     | -72.29 to 55.62    | No           | ns      |

# Figure 3

K.

AUC - GTT

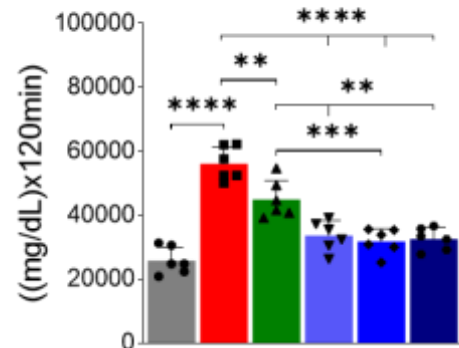

| CTL   | OB    | TRF   | TRF+AT | TRF+RT | TRF+CT |
|-------|-------|-------|--------|--------|--------|
| 20895 | 50115 | 40590 | 26460  | 25215  | 33495  |
| 24810 | 52485 | 49260 | 32505  | 30900  | 29220  |
| 24795 | 57645 | 39075 | 39255  | 33840  | 36645  |
| 31290 | 62235 | 54540 | 30645  | 30000  | 27750  |
| 30645 | 62070 | 44580 | 35730  | 35640  | 35760  |
| 22410 | 52440 | 41490 | 37350  | 35370  | 32490  |

Shapiro-Wilk test

|                       |        |        |        |        |        |        |
|-----------------------|--------|--------|--------|--------|--------|--------|
| W                     | 0.8879 | 0.8696 | 0.9083 | 0.9691 | 0.9074 | 0.9409 |
| P value               | 0.3075 | 0.2245 | 0.4255 | 0.8865 | 0.4195 | 0.6664 |
| Passed normality test | Yes    | Yes    | Yes    | Yes    | Yes    | Yes    |
| P value summary       | ns     | ns     | ns     | ns     | ns     | ns     |

Ordinary one-way ANOVA  
ANOVA results

| Tukey's multiple com | Mean Diff. | 95.00% CI of diff. | Significant? | Summary |
|----------------------|------------|--------------------|--------------|---------|
| CTL vs. OB           | -30358     | -38581 to -22134   | Yes          | ****    |
| CTL vs. TRF          | -19115     | -27338 to -10892   | Yes          | ****    |
| CTL vs. TRF+AT       | -7850      | -16073 to 373.4    | No           | ns      |
| CTL vs. TRF+RT       | -6020      | -14243 to 2203     | No           | ns      |
| CTL vs. TRF+CT       | -6753      | -14976 to 1471     | No           | ns      |
| OB vs. TRF           | 11243      | 3019 to 19466      | Yes          | **      |
| OB vs. TRF+AT        | 22508      | 14284 to 30731     | Yes          | ****    |
| OB vs. TRF+RT        | 24338      | 16114 to 32561     | Yes          | ****    |
| OB vs. TRF+CT        | 23605      | 15382 to 31828     | Yes          | ****    |
| TRF vs. TRF+AT       | 11265      | 3042 to 19488      | Yes          | **      |
| TRF vs. TRF+RT       | 13095      | 4872 to 21318      | Yes          | ***     |
| TRF vs. TRF+CT       | 12363      | 4139 to 20586      | Yes          | **      |
| TRF+AT vs. TRF+RT    | 1830       | -6393 to 10053     | No           | ns      |
| TRF+AT vs. TRF+CT    | 1098       | -7126 to 9321      | No           | ns      |
| TRF+RT vs. TRF+CT    | -732.5     | -8956 to 7491      | No           | ns      |

- CTL
- OB
- ▲ TRF
- ▼ TRF+AT
- ◆ TRF+RT
- TRF+CT

M.

AUC - ITT

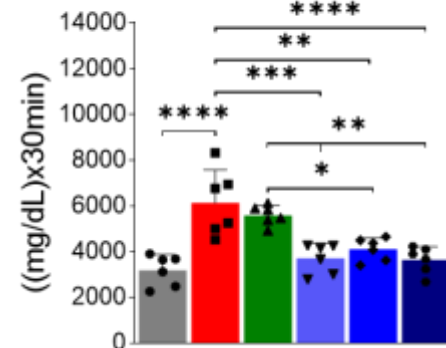

| CTL    | OB     | TRF    | TRF+AT | TRF+RT | TRF+CT |
|--------|--------|--------|--------|--------|--------|
| 2257.5 | 5002.5 | 5870.0 | 2802.5 | 4652.5 | 4092.5 |
| 3645.0 | 6757.5 | 4907.5 | 4285.0 | 3620.0 | 4227.5 |
| 3907.5 | 6930.0 | 5817.5 | 4175.0 | 3402.5 | 2677.5 |
| 3122.5 | 4517.5 | 5457.5 | 3682.5 | 4370.0 | 3672.5 |
| 3680.0 | 8327.5 | 6112.5 | 4270.0 | 4502.5 | 3242.5 |
| 2477.5 | 5250.0 | 5360.0 | 3025.0 | 4082.5 | 3887.5 |

Shapiro-Wilk test

|                       |        |        |        |        |        |        |
|-----------------------|--------|--------|--------|--------|--------|--------|
| W                     | 0.8905 | 0.9286 | 0.9602 | 0.8413 | 0.9223 | 0.9273 |
| P value               | 0.3210 | 0.5694 | 0.8209 | 0.1337 | 0.5220 | 0.5591 |
| Passed normality test | Yes    | Yes    | Yes    | Yes    | Yes    | Yes    |
| P value summary       | ns     | ns     | ns     | ns     | ns     | ns     |

Ordinary one-way ANOVA  
ANOVA results

| Tukey's multiple com | Mean Diff. | 95.00% CI of diff. | Significant? | Summary |
|----------------------|------------|--------------------|--------------|---------|
| CTL vs. OB           | -2949      | -4343 to -1555     | Yes          | ****    |
| CTL vs. TRF          | -2406      | -3800 to -1012     | Yes          | ***     |
| CTL vs. TRF+AT       | -525.0     | -1919 to 868.8     | No           | ns      |
| CTL vs. TRF+RT       | -923.3     | -2317 to 470.5     | No           | ns      |
| CTL vs. TRF+CT       | -451.7     | -1845 to 942.1     | No           | ns      |
| OB vs. TRF           | 543.3      | -850.5 to 1937     | No           | ns      |
| OB vs. TRF+AT        | 2424       | 1030 to 3818       | Yes          | ***     |
| OB vs. TRF+RT        | 2026       | 632.0 to 3420      | Yes          | **      |
| OB vs. TRF+CT        | 2498       | 1104 to 3891       | Yes          | ****    |
| TRF vs. TRF+AT       | 1881       | 487.0 to 3275      | Yes          | **      |
| TRF vs. TRF+RT       | 1483       | 88.71 to 2876      | Yes          | *       |
| TRF vs. TRF+CT       | 1954       | 560.4 to 3348      | Yes          | **      |
| TRF+AT vs. TRF+RT    | -398.3     | -1792 to 995.5     | No           | ns      |
| TRF+AT vs. TRF+CT    | 73.33      | -1320 to 1467      | No           | ns      |
| TRF+RT vs. TRF+CT    | 471.7      | -922.1 to 1865     | No           | ns      |

# Figure 4

## B. Oil Red Staining

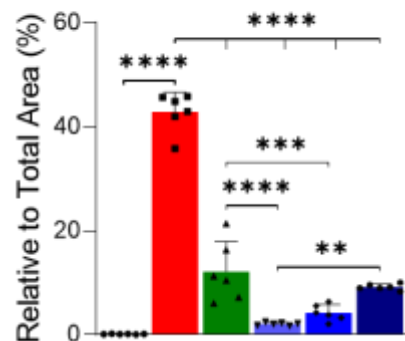

| CTL     | OB      | TRF      | TRF+AT  | TRF+RT  | TRF+CT   |
|---------|---------|----------|---------|---------|----------|
| 0.15411 | 35.8806 | 7.21478  | 1.74859 | 2.05619 | 8.31213  |
| 0.13152 | 44.9315 | 6.07455  | 2.07829 | 5.59405 | 10.04260 |
| 0.10237 | 42.9786 | 16.38280 | 1.84917 | 3.84512 | 8.96455  |
| 0.19887 | 45.7334 | 10.47340 | 2.45945 | 6.38256 | 9.15679  |
| 0.08034 | 42.0300 | 11.34710 | 2.15849 | 3.25956 | 8.97899  |
| 0.21324 | 45.8806 | 21.44020 | 2.28200 | 4.27850 | 9.59888  |

### Shapiro-Wilk test

|                       |     |        |        |        |        |        |        |
|-----------------------|-----|--------|--------|--------|--------|--------|--------|
| W                     |     | 0.9503 | 0.8216 | 0.9293 | 0.9729 | 0.9810 | 0.9697 |
| P value               |     | 0.7430 | 0.0911 | 0.5750 | 0.9113 | 0.9564 | 0.8905 |
| Passed normality test | Yes | Yes    | Yes    | Yes    | Yes    | Yes    | Yes    |
| P value summary       | ns  | ns     | ns     | ns     | ns     | ns     | ns     |

### Ordinary one-way ANOVA ANOVA results

| Tukey's multiple com | Mean Diff. | 95.00% CI of diff. | Significant? | Summary |
|----------------------|------------|--------------------|--------------|---------|
| CTL vs. OB           | -42.76     | -47.87 to -37.64   | Yes          | ****    |
| CTL vs. TRF          | -12.01     | -17.12 to -6.894   | Yes          | ****    |
| CTL vs. TRF+AT       | -1.949     | -7.064 to 3.165    | No           | ns      |
| CTL vs. TRF+RT       | -4.089     | -9.204 to 1.025    | No           | ns      |
| CTL vs. TRF+CT       | -9.029     | -14.14 to -3.915   | Yes          | ***     |
| OB vs. TRF           | 30.75      | 25.64 to 35.86     | Yes          | ****    |
| OB vs. TRF+AT        | 40.81      | 35.70 to 45.92     | Yes          | ****    |
| OB vs. TRF+RT        | 38.67      | 33.56 to 43.78     | Yes          | ****    |
| OB vs. TRF+CT        | 33.73      | 28.62 to 38.84     | Yes          | ****    |
| TRF vs. TRF+AT       | 10.06      | 4.945 to 15.17     | Yes          | ****    |
| TRF vs. TRF+RT       | 7.919      | 2.805 to 13.03     | Yes          | ***     |
| TRF vs. TRF+CT       | 2.980      | -2.135 to 8.094    | No           | ns      |
| TRF+AT vs. TRF+RT    | -2.140     | -7.254 to 2.974    | No           | ns      |
| TRF+AT vs. TRF+CT    | -7.080     | -12.19 to -1.965   | Yes          | **      |
| TRF+RT vs. TRF+CT    | -4.940     | -10.05 to 0.1747   | No           | ns      |

- CTL
- OB
- ▲ TRF
- ▼ TRF+AT
- ◆ TRF+RT
- TRF+CT

## C. Relative Weight of Liver

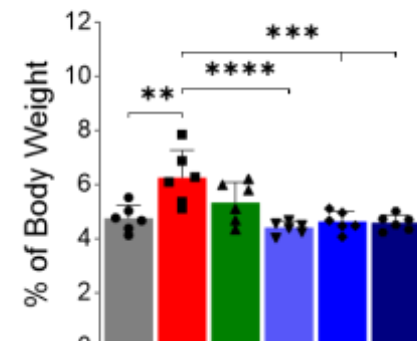

| CTL         | OB          | TRF         | TRF+AT      | TRF+RT      | TRF+CT      |
|-------------|-------------|-------------|-------------|-------------|-------------|
| 4.373716632 | 7.847896440 | 4.652908068 | 4.242681375 | 4.473684211 | 4.332998997 |
| 4.664141917 | 6.879722922 | 5.963069626 | 4.394002499 | 4.665798611 | 5.007554500 |
| 5.027051398 | 5.105105000 | 6.188765513 | 4.037448800 | 4.955714888 | 4.692307692 |
| 4.126696833 | 5.356545000 | 5.075705437 | 4.688172043 | 4.069545281 | 4.723376339 |
| 4.761904762 | 6.271713000 | 4.319654428 | 4.568854569 | 4.469387755 | 4.223493181 |
| 5.516885795 | 6.098320000 | 5.767214261 | 4.500000000 | 5.109179563 | 4.502369668 |

### Shapiro-Wilk test

|                       |     |        |        |        |        |        |        |
|-----------------------|-----|--------|--------|--------|--------|--------|--------|
| W                     |     | 0.9807 | 0.9580 | 0.9254 | 0.9714 | 0.9636 | 0.9693 |
| P value               |     | 0.9550 | 0.8041 | 0.5447 | 0.9018 | 0.8468 | 0.8874 |
| Passed normality test | Yes | Yes    | Yes    | Yes    | Yes    | Yes    | Yes    |
| P value summary       | ns  | ns     | ns     | ns     | ns     | ns     | ns     |

### Ordinary one-way ANOVA ANOVA results

| Tukey's multiple com | Mean Diff. | 95.00% CI of diff. | Significant? | Summary |
|----------------------|------------|--------------------|--------------|---------|
| CTL vs. OB           | -1.515     | -2.556 to -0.4736  | Yes          | **      |
| CTL vs. TRF          | -0.5828    | -1.624 to 0.4584   | No           | ns      |
| CTL vs. TRF+AT       | 0.3399     | -0.7013 to 1.381   | No           | ns      |
| CTL vs. TRF+RT       | 0.1212     | -0.9200 to 1.162   | No           | ns      |
| CTL vs. TRF+CT       | 0.1647     | -0.8765 to 1.206   | No           | ns      |
| OB vs. TRF           | 0.9320     | -0.1092 to 1.973   | No           | ns      |
| OB vs. TRF+AT        | 1.855      | 0.8135 to 2.896    | Yes          | ****    |
| OB vs. TRF+RT        | 1.636      | 0.5948 to 2.677    | Yes          | ***     |
| OB vs. TRF+CT        | 1.680      | 0.6383 to 2.721    | Yes          | ***     |
| TRF vs. TRF+AT       | 0.9227     | -0.1185 to 1.964   | No           | ns      |
| TRF vs. TRF+RT       | 0.7040     | -0.3372 to 1.745   | No           | ns      |
| TRF vs. TRF+CT       | 0.7475     | -0.2937 to 1.789   | No           | ns      |
| TRF+AT vs. TRF+RT    | -0.2187    | -1.260 to 0.8225   | No           | ns      |
| TRF+AT vs. TRF+CT    | -0.1752    | -1.216 to 0.8660   | No           | ns      |
| TRF+RT vs. TRF+CT    | 0.04353    | -0.9977 to 1.085   | No           | ns      |



# Figure 4

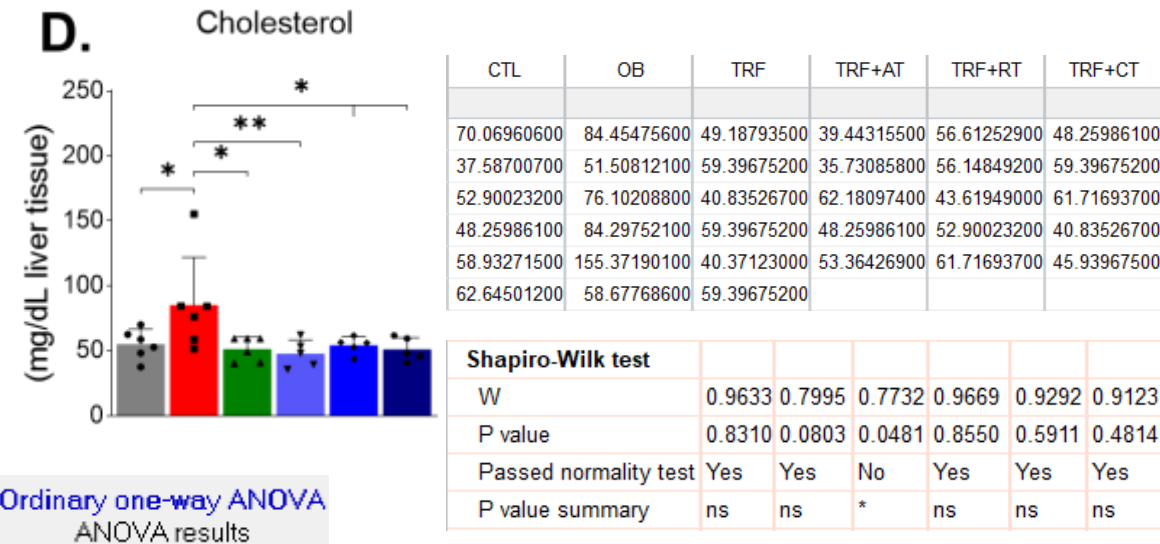

| Tukey's multiple com | Mean Diff. | 95.00% CI of diff.  | Significant? | Summary |
|----------------------|------------|---------------------|--------------|---------|
| CTL vs. OB           | -0.3972    | -0.7342 to -0.06013 | Yes          | *       |
| CTL vs. TRF          | -0.01485   | -0.3519 to 0.3222   | No           | ns      |
| CTL vs. TRF+AT       | 0.04269    | -0.2943 to 0.3797   | No           | ns      |
| CTL vs. TRF+RT       | -0.02135   | -0.3584 to 0.3157   | No           | ns      |
| CTL vs. TRF+CT       | 0.008353   | -0.3287 to 0.3454   | No           | ns      |
| OB vs. TRF           | 0.3823     | 0.04528 to 0.7193   | Yes          | *       |
| OB vs. TRF+AT        | 0.4398     | 0.1028 to 0.7769    | Yes          | **      |
| OB vs. TRF+RT        | 0.3758     | 0.03878 to 0.7128   | Yes          | *       |
| OB vs. TRF+CT        | 0.4055     | 0.06848 to 0.7425   | Yes          | *       |
| TRF vs. TRF+AT       | 0.05754    | -0.2795 to 0.3946   | No           | ns      |
| TRF vs. TRF+RT       | -0.006497  | -0.3435 to 0.3305   | No           | ns      |
| TRF vs. TRF+CT       | 0.02320    | -0.3138 to 0.3602   | No           | ns      |
| TRF+AT vs. TRF+RT    | -0.06404   | -0.4011 to 0.2730   | No           | ns      |
| TRF+AT vs. TRF+CT    | -0.03434   | -0.3714 to 0.3027   | No           | ns      |
| TRF+RT vs. TRF+CT    | 0.02970    | -0.3073 to 0.3667   | No           | ns      |

- CTL
- OB
- ▲ TRF
- ▼ TRF+AT
- ◆ TRF+RT
- TRF+CT

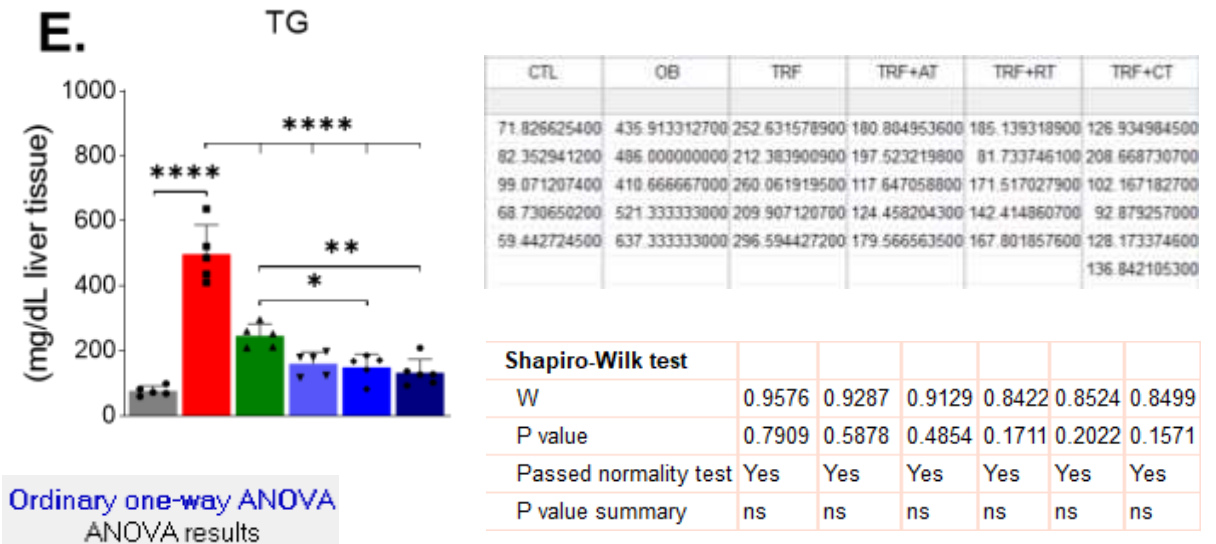

| Tukey's multiple com | Mean Diff. | 95.00% CI of diff. | Significant? | Summary |
|----------------------|------------|--------------------|--------------|---------|
| CTL vs. OB           | -4.220     | -5.159 to -3.280   | Yes          | ****    |
| CTL vs. TRF          | -1.700     | -2.640 to -0.7606  | Yes          | ***     |
| CTL vs. TRF+AT       | -0.8372    | -1.777 to 0.1025   | No           | ns      |
| CTL vs. TRF+RT       | -0.7344    | -1.674 to 0.2053   | No           | ns      |
| CTL vs. TRF+CT       | -0.5633    | -1.463 to 0.3364   | No           | ns      |
| OB vs. TRF           | 2.519      | 1.580 to 3.459     | Yes          | ****    |
| OB vs. TRF+AT        | 3.382      | 2.443 to 4.322     | Yes          | ****    |
| OB vs. TRF+RT        | 3.485      | 2.546 to 4.425     | Yes          | ****    |
| OB vs. TRF+CT        | 3.656      | 2.757 to 4.556     | Yes          | ****    |
| TRF vs. TRF+AT       | 0.8632     | -0.07651 to 1.803  | No           | ns      |
| TRF vs. TRF+RT       | 0.9659     | 0.02627 to 1.906   | Yes          | *       |
| TRF vs. TRF+CT       | 1.137      | 0.2374 to 2.037    | Yes          | **      |
| TRF+AT vs. TRF+RT    | 0.1028     | -0.8369 to 1.042   | No           | ns      |
| TRF+AT vs. TRF+CT    | 0.2739     | -0.6258 to 1.174   | No           | ns      |
| TRF+RT vs. TRF+CT    | 0.1711     | -0.7286 to 1.071   | No           | ns      |



# Figure 4

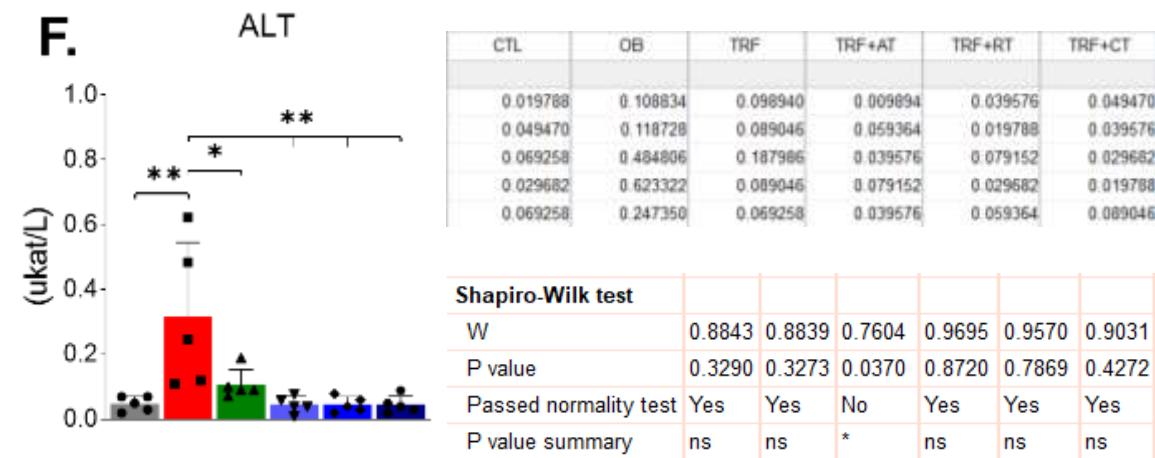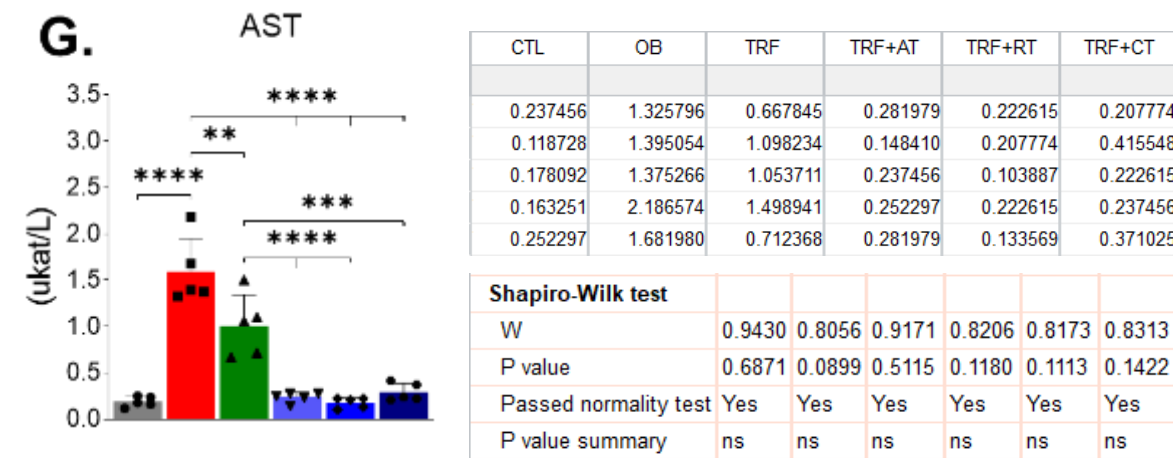

## Ordinary one-way ANOVA

### ANOVA results

| Tukey's multiple com | Mean Diff. | 95.00% CI of diff.  | Significant? | Summary |
|----------------------|------------|---------------------|--------------|---------|
| CTL vs. OB           | -0.2691    | -0.4597 to -0.07851 | Yes          | **      |
| CTL vs. TRF          | -0.05936   | -0.2500 to 0.1312   | No           | ns      |
| CTL vs. TRF+AT       | 0.001979   | -0.1886 to 0.1926   | No           | ns      |
| CTL vs. TRF+RT       | 0.001979   | -0.1886 to 0.1926   | No           | ns      |
| CTL vs. TRF+CT       | 0.001979   | -0.1886 to 0.1926   | No           | ns      |
| OB vs. TRF           | 0.2098     | 0.01915 to 0.4004   | Yes          | *       |
| OB vs. TRF+AT        | 0.2711     | 0.08049 to 0.4617   | Yes          | **      |
| OB vs. TRF+RT        | 0.2711     | 0.08049 to 0.4617   | Yes          | **      |
| OB vs. TRF+CT        | 0.2711     | 0.08049 to 0.4617   | Yes          | **      |
| TRF vs. TRF+AT       | 0.06134    | -0.1293 to 0.2519   | No           | ns      |
| TRF vs. TRF+RT       | 0.06134    | -0.1293 to 0.2519   | No           | ns      |
| TRF vs. TRF+CT       | 0.06134    | -0.1293 to 0.2519   | No           | ns      |
| TRF+AT vs. TRF+RT    | 0.000      | -0.1906 to 0.1906   | No           | ns      |
| TRF+AT vs. TRF+CT    | 0.000      | -0.1906 to 0.1906   | No           | ns      |
| TRF+RT vs. TRF+CT    | 0.000      | -0.1906 to 0.1906   | No           | ns      |

- CTL
- OB
- ▲ TRF
- ▼ TRF+AT
- ◆ TRF+RT
- TRF+CT

| Tukey's multiple com | Mean Diff. | 95.00% CI of diff. | Significant? | Summary |
|----------------------|------------|--------------------|--------------|---------|
| CTL vs. OB           | -1.403     | -1.811 to -0.9948  | Yes          | ****    |
| CTL vs. TRF          | -0.8163    | -1.224 to -0.4081  | Yes          | ****    |
| CTL vs. TRF+AT       | -0.05046   | -0.4586 to 0.3577  | No           | ns      |
| CTL vs. TRF+RT       | 0.01187    | -0.3963 to 0.4200  | No           | ns      |
| CTL vs. TRF+CT       | -0.1009    | -0.5091 to 0.3072  | No           | ns      |
| OB vs. TRF           | 0.5867     | 0.1786 to 0.9948   | Yes          | **      |
| OB vs. TRF+AT        | 1.353      | 0.9444 to 1.761    | Yes          | ****    |
| OB vs. TRF+RT        | 1.415      | 1.007 to 1.823     | Yes          | ****    |
| OB vs. TRF+CT        | 1.302      | 0.8939 to 1.710    | Yes          | ****    |
| TRF vs. TRF+AT       | 0.7658     | 0.3577 to 1.174    | Yes          | ****    |
| TRF vs. TRF+RT       | 0.8281     | 0.4200 to 1.236    | Yes          | ****    |
| TRF vs. TRF+CT       | 0.7153     | 0.3072 to 1.123    | Yes          | ***     |
| TRF+AT vs. TRF+RT    | 0.06233    | -0.3458 to 0.4705  | No           | ns      |
| TRF+AT vs. TRF+CT    | -0.05046   | -0.4586 to 0.3577  | No           | ns      |
| TRF+RT vs. TRF+CT    | -0.1128    | -0.5209 to 0.2953  | No           | ns      |

Figure 4

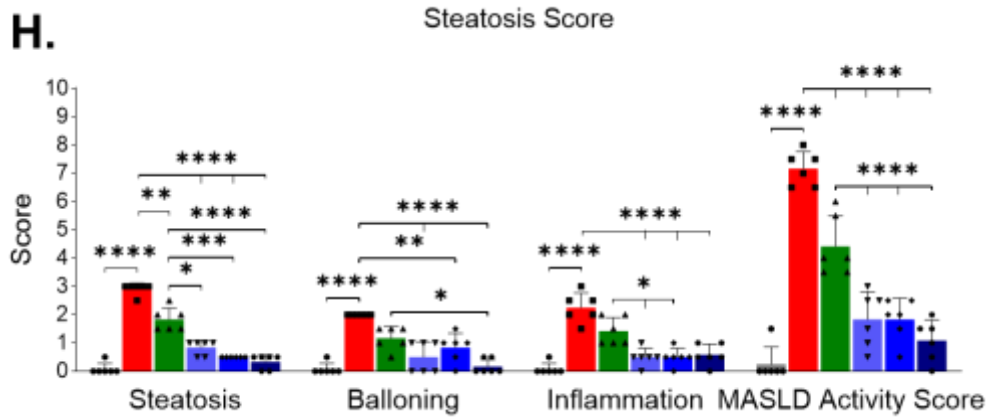

|                      | CTL  |      |      |      |      |      |
|----------------------|------|------|------|------|------|------|
|                      | A:Y1 | A:Y2 | A:Y3 | A:Y4 | A:Y5 | A:Y6 |
| Steatosis            | 0    | 0    | 0    | 1    | 0    | 0    |
| Balloning            | 0    | 0    | 0    | 1    | 0    | 0    |
| Inflammation         | 0    | 0    | 0    | 1    | 0    | 0    |
| MASLD Activity Score | 0    | 0    | 0    | 2    | 0    | 0    |

|                      | OB   |      |      |      |      |      |
|----------------------|------|------|------|------|------|------|
|                      | B:Y1 | B:Y2 | B:Y3 | B:Y4 | B:Y5 | B:Y6 |
| Steatosis            | 3.0  | 2.5  | 3.0  | 3.0  | 3.0  | 3.0  |
| Balloning            | 2.0  | 2.0  | 2.0  | 2.0  | 2.0  | 2.0  |
| Inflammation         | 2.5  | 2.0  | 2.0  | 2.5  | 3.0  | 1.5  |
| MASLD Activity Score | 7.5  | 6.5  | 7.0  | 7.5  | 8.0  | 6.5  |

|                      | TRF  |      |      |      |      |      |
|----------------------|------|------|------|------|------|------|
|                      | C:Y1 | C:Y2 | C:Y3 | C:Y4 | C:Y5 | C:Y6 |
| Steatosis            | 2    | 2    | 2    | 2    | 2    | 3    |
| Balloning            | 1    | 2    | 1    | 1    | 2    | 2    |
| Inflammation         | 1    | 1    | 1    | 2    | 2    | 2    |
| MASLD Activity Score | 4    | 4    | 4    | 4    | 6    | 6    |

|                      | TRF+AT |      |      |      |      |      |
|----------------------|--------|------|------|------|------|------|
|                      | D:Y1   | D:Y2 | D:Y3 | D:Y4 | D:Y5 | D:Y6 |
| Steatosis            | 1.0    | 0.5  | 1.0  | 0.5  | 1.0  | 1.0  |
| Balloning            | 0.0    | 0.0  | 1.0  | 0.0  | 1.0  | 1.0  |
| Inflammation         | 0.5    | 0.0  | 0.5  | 0.5  | 0.5  | 1.0  |
| MASLD Activity Score | 1.5    | 0.5  | 2.5  | 1.0  | 2.5  | 3.0  |

|                      | TRF+RT |      |      |      |      |      |
|----------------------|--------|------|------|------|------|------|
|                      | E:Y1   | E:Y2 | E:Y3 | E:Y4 | E:Y5 | E:Y6 |
| Steatosis            | 0.5    | 0.5  | 0.5  | 0.5  | 0.5  | 0.5  |
| Balloning            | 1.0    | 1.0  | 1.5  | 1.0  | 0.0  | 0.5  |
| Inflammation         | 0.5    | 1.0  | 0.5  | 0.5  | 0.0  | 0.5  |
| MASLD Activity Score | 2.0    | 2.5  | 2.5  | 2.0  | 0.5  | 1.5  |

|                      | TRF+CT |      |      |      |      |      |
|----------------------|--------|------|------|------|------|------|
|                      | F:Y1   | F:Y2 | F:Y3 | F:Y4 | F:Y5 | F:Y6 |
| Steatosis            | 0.0    | 0.5  | 0.0  | 0.5  | 0.5  | 0.5  |
| Balloning            | 0.0    | 0.5  | 0.0  | 0.0  | 0.5  | 0.0  |
| Inflammation         | 0.5    | 0.5  | 0.0  | 1.0  | 1.0  | 0.5  |
| MASLD Activity Score | 0.5    | 1.5  | 0.0  | 1.5  | 2.0  | 1.0  |

● CTL ■ OB ▲ TRF ▼ TRF+AT ◆ TRF+RT ● TRF+CT

# Figure 4

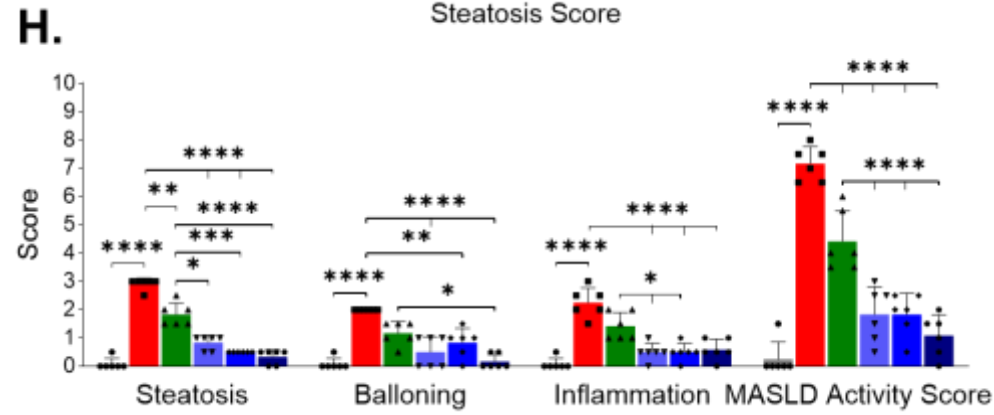

| Shapiro-Wilk test     |        |        |        |        |        |        |
|-----------------------|--------|--------|--------|--------|--------|--------|
| W                     | 0.6298 | 0.7632 | 0.7881 | 0.7907 | 0.7907 | 0.9412 |
| P value               | 0.0012 | 0.0509 | 0.0826 | 0.0865 | 0.0865 | 0.6620 |
| Passed normality test | No     | Yes    | Yes    | Yes    | Yes    | Yes    |
| P value summary       | **     | ns     | ns     | ns     | ns     | ns     |

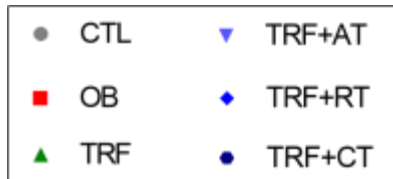

**2way ANOVA**  
Multiple comparisons

| Tukey's multiple comp | Mean Diff. | 95.00% CI of diff. | Significant? | Summary |
|-----------------------|------------|--------------------|--------------|---------|
| Steatosis             |            |                    |              |         |
| CTL vs. OB            | -2.833     | -3.675 to -1.991   | Yes          | ****    |
| CTL vs. TRF           | -1.750     | -2.592 to -0.9081  | Yes          | ****    |
| CTL vs. TRF+AT        | -0.7500    | -1.592 to 0.09188  | No           | ns      |
| CTL vs. TRF+RT        | -0.4167    | -1.259 to 0.4252   | No           | ns      |
| CTL vs. TRF+CT        | -0.2500    | -1.092 to 0.5919   | No           | ns      |
| OB vs. TRF            | 1.083      | 0.2415 to 1.925    | Yes          | **      |
| OB vs. TRF+AT         | 2.083      | 1.241 to 2.925     | Yes          | ****    |
| OB vs. TRF+RT         | 2.417      | 1.575 to 3.259     | Yes          | ****    |
| OB vs. TRF+CT         | 2.583      | 1.741 to 3.425     | Yes          | ****    |
| TRF vs. TRF+AT        | 1.000      | 0.1581 to 1.842    | Yes          | *       |
| TRF vs. TRF+RT        | 1.333      | 0.4915 to 2.175    | Yes          | ***     |
| TRF vs. TRF+CT        | 1.500      | 0.6581 to 2.342    | Yes          | ****    |
| TRF+AT vs. TRF+RT     | 0.3333     | -0.5085 to 1.175   | No           | ns      |
| TRF+AT vs. TRF+CT     | 0.5000     | -0.3419 to 1.342   | No           | ns      |
| TRF+RT vs. TRF+CT     | 0.1667     | -0.6752 to 1.009   | No           | ns      |

**2way ANOVA**  
Multiple comparisons

| Tukey's multiple comp | Mean Diff. | 95.00% CI of diff. | Significant? | Summary |
|-----------------------|------------|--------------------|--------------|---------|
| Inflammation          |            |                    |              |         |
| CTL vs. OB            | -2.167     | -3.009 to -1.325   | Yes          | ****    |
| CTL vs. TRF           | -1.333     | -2.175 to -0.4915  | Yes          | ***     |
| CTL vs. TRF+AT        | -0.4167    | -1.259 to 0.4252   | No           | ns      |
| CTL vs. TRF+RT        | -0.4167    | -1.259 to 0.4252   | No           | ns      |
| CTL vs. TRF+CT        | -0.5000    | -1.342 to 0.3419   | No           | ns      |
| OB vs. TRF            | 0.8333     | -0.008542 to 1.675 | No           | ns      |
| OB vs. TRF+AT         | 1.750      | 0.9081 to 2.592    | Yes          | ****    |
| OB vs. TRF+RT         | 1.750      | 0.9081 to 2.592    | Yes          | ****    |
| OB vs. TRF+CT         | 1.667      | 0.8248 to 2.509    | Yes          | ****    |
| TRF vs. TRF+AT        | 0.9167     | 0.07479 to 1.759   | Yes          | *       |
| TRF vs. TRF+RT        | 0.9167     | 0.07479 to 1.759   | Yes          | *       |
| TRF vs. TRF+CT        | 0.8333     | -0.008542 to 1.675 | No           | ns      |
| TRF+AT vs. TRF+RT     | 0.000      | -0.8419 to 0.8419  | No           | ns      |
| TRF+AT vs. TRF+CT     | -0.08333   | -0.9252 to 0.7585  | No           | ns      |
| TRF+RT vs. TRF+CT     | -0.08333   | -0.9252 to 0.7585  | No           | ns      |

**2way ANOVA**  
Multiple comparisons

| Tukey's multiple comp | Mean Diff. | 95.00% CI of diff. | Significant? | Summary |
|-----------------------|------------|--------------------|--------------|---------|
| Balloning             |            |                    |              |         |
| CTL vs. OB            | -1.917     | -2.759 to -1.075   | Yes          | ****    |
| CTL vs. TRF           | -1.083     | -1.925 to -0.2415  | Yes          | **      |
| CTL vs. TRF+AT        | -0.4167    | -1.259 to 0.4252   | No           | ns      |
| CTL vs. TRF+RT        | -0.7500    | -1.592 to 0.09188  | No           | ns      |
| CTL vs. TRF+CT        | -0.08333   | -0.9252 to 0.7585  | No           | ns      |
| OB vs. TRF            | 0.8333     | -0.008542 to 1.675 | No           | ns      |
| OB vs. TRF+AT         | 1.500      | 0.6581 to 2.342    | Yes          | ****    |
| OB vs. TRF+RT         | 1.167      | 0.3248 to 2.009    | Yes          | **      |
| OB vs. TRF+CT         | 1.833      | 0.9915 to 2.675    | Yes          | ****    |
| TRF vs. TRF+AT        | 0.6667     | -0.1752 to 1.509   | No           | ns      |
| TRF vs. TRF+RT        | 0.3333     | -0.5085 to 1.175   | No           | ns      |
| TRF vs. TRF+CT        | 1.000      | 0.1581 to 1.842    | Yes          | *       |
| TRF+AT vs. TRF+RT     | -0.3333    | -1.175 to 0.5085   | No           | ns      |
| TRF+AT vs. TRF+CT     | 0.3333     | -0.5085 to 1.175   | No           | ns      |
| TRF+RT vs. TRF+CT     | 0.6667     | -0.1752 to 1.509   | No           | ns      |

**2way ANOVA**  
Multiple comparisons

| Tukey's multiple comp | Mean Diff. | 95.00% CI of diff. | Significant? | Summary |
|-----------------------|------------|--------------------|--------------|---------|
| MASLD Activity Score  |            |                    |              |         |
| CTL vs. OB            | -6.917     | -7.759 to -6.075   | Yes          | ****    |
| CTL vs. TRF           | -4.167     | -5.009 to -3.325   | Yes          | ****    |
| CTL vs. TRF+AT        | -1.583     | -2.425 to -0.7415  | Yes          | ****    |
| CTL vs. TRF+RT        | -1.583     | -2.425 to -0.7415  | Yes          | ****    |
| CTL vs. TRF+CT        | -0.8333    | -1.675 to 0.008542 | No           | ns      |
| OB vs. TRF            | 2.750      | 1.908 to 3.592     | Yes          | ****    |
| OB vs. TRF+AT         | 5.333      | 4.491 to 6.175     | Yes          | ****    |
| OB vs. TRF+RT         | 5.333      | 4.491 to 6.175     | Yes          | ****    |
| OB vs. TRF+CT         | 6.083      | 5.241 to 6.925     | Yes          | ****    |
| TRF vs. TRF+AT        | 2.583      | 1.741 to 3.425     | Yes          | ****    |
| TRF vs. TRF+RT        | 2.583      | 1.741 to 3.425     | Yes          | ****    |
| TRF vs. TRF+CT        | 3.333      | 2.491 to 4.175     | Yes          | ****    |
| TRF+AT vs. TRF+RT     | 0.000      | -0.8419 to 0.8419  | No           | ns      |
| TRF+AT vs. TRF+CT     | 0.7500     | -0.09188 to 1.592  | No           | ns      |
| TRF+RT vs. TRF+CT     | 0.7500     | -0.09188 to 1.592  | No           | ns      |



# Figure 4

I.

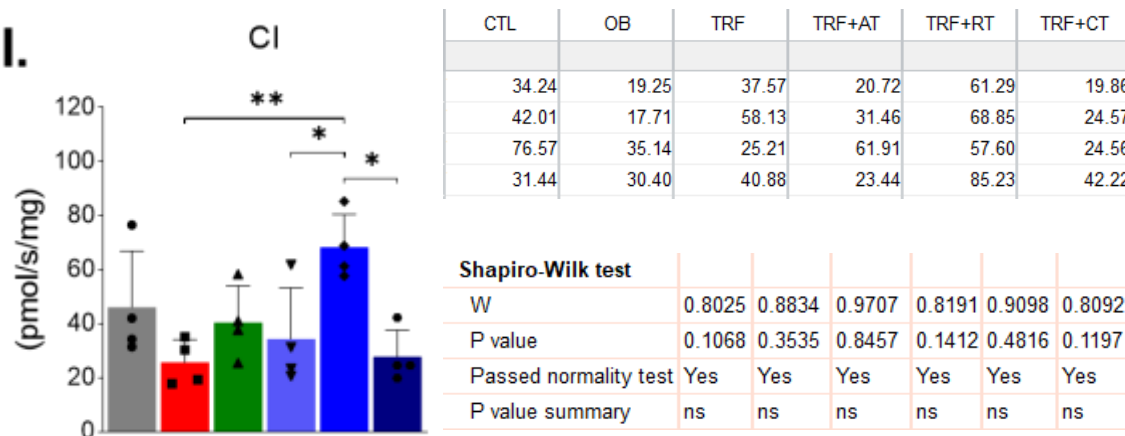

J.

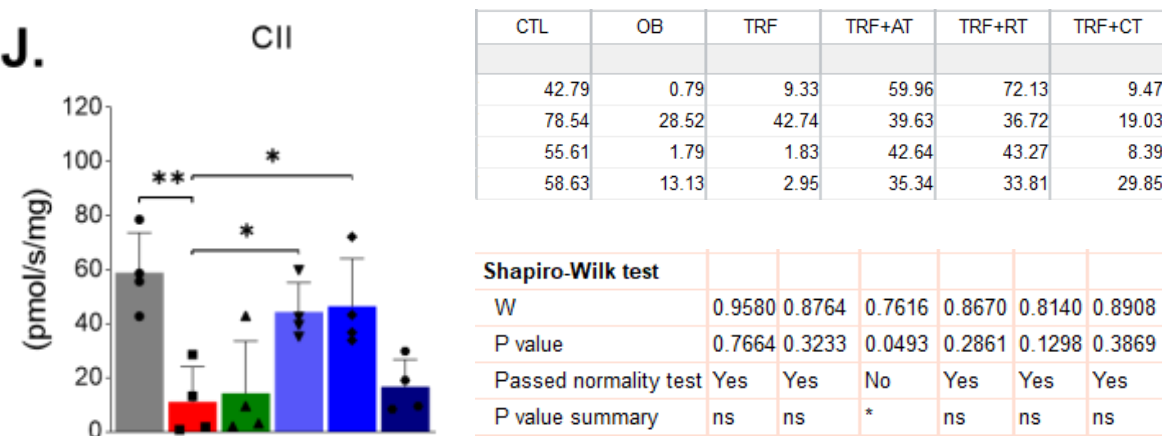

Ordinary one-way ANOVA  
ANOVA results

| Tukey's multiple com | Mean Diff. | 95.00% CI of diff. | Significant? | Summary |
|----------------------|------------|--------------------|--------------|---------|
| CTL vs. OB           | 20.44      | -12.58 to 53.46    | No           | ns      |
| CTL vs. TRF          | 5.617      | -27.40 to 38.64    | No           | ns      |
| CTL vs. TRF+AT       | 11.68      | -21.34 to 44.70    | No           | ns      |
| CTL vs. TRF+RT       | -22.18     | -55.20 to 10.84    | No           | ns      |
| CTL vs. TRF+CT       | 18.26      | -14.76 to 51.28    | No           | ns      |
| OB vs. TRF           | -14.82     | -47.84 to 18.20    | No           | ns      |
| OB vs. TRF+AT        | -8.758     | -41.78 to 24.26    | No           | ns      |
| OB vs. TRF+RT        | -42.62     | -75.64 to -9.600   | Yes          | **      |
| OB vs. TRF+CT        | -2.178     | -35.20 to 30.84    | No           | ns      |
| TRF vs. TRF+AT       | 6.065      | -26.95 to 39.08    | No           | ns      |
| TRF vs. TRF+RT       | -27.80     | -60.81 to 5.223    | No           | ns      |
| TRF vs. TRF+CT       | 12.65      | -20.37 to 45.66    | No           | ns      |
| TRF+AT vs. TRF+RT    | -33.86     | -66.88 to -0.8421  | Yes          | *       |
| TRF+AT vs. TRF+CT    | 6.580      | -26.44 to 39.60    | No           | ns      |
| TRF+RT vs. TRF+CT    | 40.44      | 7.422 to 73.46     | Yes          | *       |

- CTL
- OB
- ▲ TRF
- ▼ TRF+AT
- ◆ TRF+RT
- TRF+CT

Ordinary one-way ANOVA  
ANOVA results

| Tukey's multiple com | Mean Diff. | 95.00% CI of diff. | Significant? | Summary |
|----------------------|------------|--------------------|--------------|---------|
| CTL vs. OB           | 47.84      | 14.98 to 80.69     | Yes          | **      |
| CTL vs. TRF          | 44.68      | 11.82 to 77.54     | Yes          | **      |
| CTL vs. TRF+AT       | 14.50      | -18.36 to 47.36    | No           | ns      |
| CTL vs. TRF+RT       | 12.41      | -20.45 to 45.27    | No           | ns      |
| CTL vs. TRF+CT       | 42.21      | 9.350 to 75.07     | Yes          | **      |
| OB vs. TRF           | -3.155     | -36.01 to 29.70    | No           | ns      |
| OB vs. TRF+AT        | -33.34     | -66.19 to -0.4771  | Yes          | *       |
| OB vs. TRF+RT        | -35.43     | -68.28 to -2.567   | Yes          | *       |
| OB vs. TRF+CT        | -5.628     | -38.49 to 27.23    | No           | ns      |
| TRF vs. TRF+AT       | -30.18     | -63.04 to 2.678    | No           | ns      |
| TRF vs. TRF+RT       | -32.27     | -65.13 to 0.5879   | No           | ns      |
| TRF vs. TRF+CT       | -2.473     | -35.33 to 30.39    | No           | ns      |
| TRF+AT vs. TRF+RT    | -2.090     | -34.95 to 30.77    | No           | ns      |
| TRF+AT vs. TRF+CT    | 27.71      | -5.150 to 60.57    | No           | ns      |
| TRF+RT vs. TRF+CT    | 29.80      | -3.060 to 62.66    | No           | ns      |

# Figure 4

K.

OXPHOS

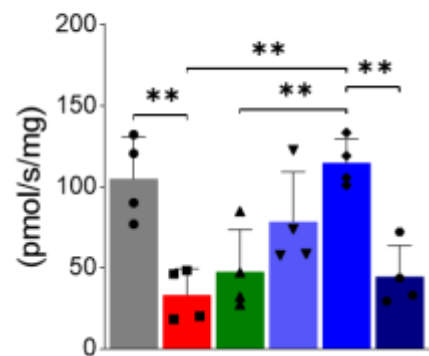

| CTL    | OB    | TRF   | TRF+AT | TRF+RT | TRF+CT |
|--------|-------|-------|--------|--------|--------|
| 77.03  | 20.04 | 46.90 | 57.93  | 133.42 | 29.33  |
| 120.55 | 46.23 | 84.62 | 74.10  | 105.56 | 43.60  |
| 132.18 | 18.16 | 27.04 | 122.92 | 100.88 | 32.95  |
| 90.08  | 48.27 | 31.82 | 58.78  | 119.05 | 72.07  |

Shapiro-Wilk test

|                       |        |        |        |        |        |        |
|-----------------------|--------|--------|--------|--------|--------|--------|
| W                     | 0.9300 | 0.7880 | 0.8669 | 0.7948 | 0.9404 | 0.8627 |
| P value               | 0.5944 | 0.0825 | 0.2857 | 0.0933 | 0.6569 | 0.2699 |
| Passed normality test | Yes    | Yes    | Yes    | Yes    | Yes    | Yes    |
| P value summary       | ns     | ns     | ns     | ns     | ns     | ns     |

Ordinary one-way ANOVA  
ANOVA results

| Tukey's multiple comp | Mean Diff. | 95.00% CI of diff. | Significant? | Summary |
|-----------------------|------------|--------------------|--------------|---------|
| CTL vs. OB            | 71.79      | 20.44 to 123.1     | Yes          | **      |
| CTL vs. TRF           | 57.37      | 6.019 to 108.7     | Yes          | *       |
| CTL vs. TRF+AT        | 26.53      | -24.82 to 77.87    | No           | ns      |
| CTL vs. TRF+RT        | -9.767     | -61.11 to 41.58    | No           | ns      |
| CTL vs. TRF+CT        | 60.47      | 9.126 to 111.8     | Yes          | *       |
| OB vs. TRF            | -14.42     | -65.77 to 36.93    | No           | ns      |
| OB vs. TRF+AT         | -45.26     | -96.60 to 6.089    | No           | ns      |
| OB vs. TRF+RT         | -81.55     | -132.9 to -30.21   | Yes          | **      |
| OB vs. TRF+CT         | -11.31     | -62.66 to 40.03    | No           | ns      |
| TRF vs. TRF+AT        | -30.84     | -82.18 to 20.51    | No           | ns      |
| TRF vs. TRF+RT        | -67.13     | -118.5 to -15.79   | Yes          | **      |
| TRF vs. TRF+CT        | 3.108      | -48.24 to 54.45    | No           | ns      |
| TRF+AT vs. TRF+RT     | -36.30     | -87.64 to 15.05    | No           | ns      |
| TRF+AT vs. TRF+CT     | 33.95      | -17.40 to 85.29    | No           | ns      |
| TRF+RT vs. TRF+CT     | 70.24      | 18.89 to 121.6     | Yes          | **      |

- CTL
- OB
- ▲ TRF
- ▼ TRF+AT
- ◆ TRF+RT
- TRF+CT

L.

ATP-Linked Respiration

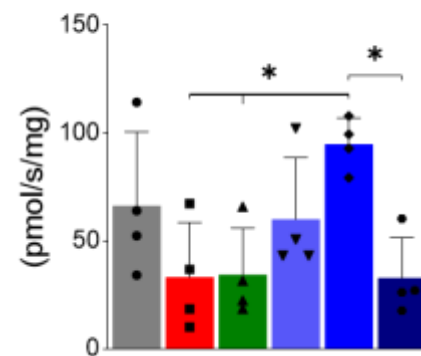

| CTL           | OB           | TRF          | TRF+AT        | TRF+RT        | TRF+CT       |
|---------------|--------------|--------------|---------------|---------------|--------------|
| 34.190000000  | 18.390000000 | 31.250000000 | 50.890000000  | 107.910000000 | 17.730000000 |
| 52.460000000  | 36.830000000 | 65.630000000 | 43.460000000  | 99.420000000  | 27.080000000 |
| 114.360000000 | 10.030000000 | 18.330000000 | 102.440000000 | 92.970000000  | 26.240000000 |
| 64.020000000  | 67.360000000 | 22.130000000 | 43.420000000  | 79.280000000  | 60.250000000 |

Shapiro-Wilk test

|                       |        |        |        |        |        |        |
|-----------------------|--------|--------|--------|--------|--------|--------|
| W                     | 0.9191 | 0.9315 | 0.8305 | 0.7182 | 0.9843 | 0.8161 |
| P value               | 0.5319 | 0.6030 | 0.1690 | 0.0185 | 0.9267 | 0.1345 |
| Passed normality test | Yes    | Yes    | Yes    | No     | Yes    | Yes    |
| P value summary       | ns     | ns     | ns     | *      | ns     | ns     |

Ordinary one-way ANOVA  
ANOVA results

| Tukey's multiple comp | Mean Diff. | 95.00% CI of diff. | Significant? | Summary |
|-----------------------|------------|--------------------|--------------|---------|
| CTL vs. OB            | 33.11      | -21.93 to 88.14    | No           | ns      |
| CTL vs. TRF           | 31.92      | -23.11 to 86.95    | No           | ns      |
| CTL vs. TRF+AT        | 6.205      | -48.83 to 61.24    | No           | ns      |
| CTL vs. TRF+RT        | -28.64     | -83.67 to 26.39    | No           | ns      |
| CTL vs. TRF+CT        | 33.43      | -21.60 to 88.46    | No           | ns      |
| OB vs. TRF            | -1.182     | -56.21 to 53.85    | No           | ns      |
| OB vs. TRF+AT         | -26.90     | -81.93 to 28.13    | No           | ns      |
| OB vs. TRF+RT         | -61.74     | -116.8 to -6.712   | Yes          | *       |
| OB vs. TRF+CT         | 0.3275     | -54.70 to 55.36    | No           | ns      |
| TRF vs. TRF+AT        | -25.72     | -80.75 to 29.31    | No           | ns      |
| TRF vs. TRF+RT        | -60.56     | -115.6 to -5.530   | Yes          | *       |
| TRF vs. TRF+CT        | 1.510      | -53.52 to 56.54    | No           | ns      |
| TRF+AT vs. TRF+RT     | -34.84     | -89.87 to 20.19    | No           | ns      |
| TRF+AT vs. TRF+CT     | 27.23      | -27.80 to 82.26    | No           | ns      |
| TRF+RT vs. TRF+CT     | 62.07      | 7.040 to 117.1     | Yes          | *       |



# Figure 6

**A.**

Total Fatty Acids

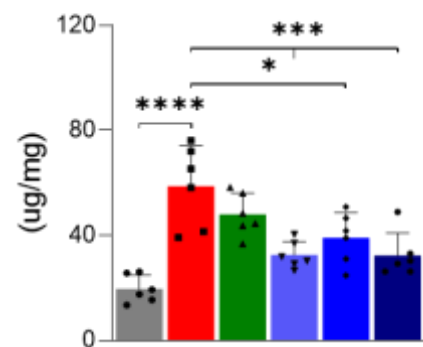

| CTL     | OB      | TRF     | TRA+AT  | TRA+RT  | TRA+CT  |
|---------|---------|---------|---------|---------|---------|
| 25.6837 | 72.0072 | 58.3238 | 26.6703 | 46.5684 | 30.3752 |
| 15.4198 | 65.3749 | 44.5477 | 30.2882 | 41.7902 | 48.9306 |
| 13.4499 | 41.4543 | 36.7722 | 31.8515 | 39.0326 | 33.0301 |
| 26.1809 | 76.1873 | 48.4883 | 40.3486 | 31.0974 | 26.2532 |
| 19.3553 | 58.2835 | 43.7866 | 36.9543 | 24.7610 | 26.2583 |
| 17.5909 | 39.1836 | 56.1798 | 29.1236 | 50.8860 | 29.2579 |

Shapiro-Wilk test

|                       |        |        |        |        |        |        |
|-----------------------|--------|--------|--------|--------|--------|--------|
| W                     | 0.9015 | 0.9028 | 0.9492 | 0.9377 | 0.9697 | 0.7571 |
| P value               | 0.3827 | 0.3905 | 0.7336 | 0.6406 | 0.8907 | 0.0233 |
| Passed normality test | Yes    | Yes    | Yes    | Yes    | Yes    | No     |
| P value summary       | ns     | ns     | ns     | ns     | ns     | *      |

Ordinary one-way ANOVA  
ANOVA results

| Tukey's multiple com | Mean Diff. | 95.00% CI of diff. | Significant? | Summary |
|----------------------|------------|--------------------|--------------|---------|
| CTL vs. OB           | -39.14     | -55.61 to -22.66   | Yes          | ****    |
| CTL vs. TRF          | -28.40     | -44.88 to -11.92   | Yes          | ***     |
| CTL vs. TRA+AT       | -12.93     | -29.41 to 3.553    | No           | ns      |
| CTL vs. TRA+RT       | -19.41     | -35.89 to -2.930   | Yes          | *       |
| CTL vs. TRA+CT       | -12.74     | -29.22 to 3.742    | No           | ns      |
| OB vs. TRF           | 10.73      | -5.747 to 27.21    | No           | ns      |
| OB vs. TRA+AT        | 26.21      | 9.730 to 42.69     | Yes          | ***     |
| OB vs. TRA+RT        | 19.73      | 3.247 to 36.21     | Yes          | *       |
| OB vs. TRA+CT        | 26.40      | 9.918 to 42.88     | Yes          | ***     |
| TRF vs. TRA+AT       | 15.48      | -1.002 to 31.96    | No           | ns      |
| TRF vs. TRA+RT       | 8.994      | -7.485 to 25.47    | No           | ns      |
| TRF vs. TRA+CT       | 15.67      | -0.8137 to 32.14   | No           | ns      |
| TRA+AT vs. TRA+RT    | -6.483     | -22.96 to 9.996    | No           | ns      |
| TRA+AT vs. TRA+CT    | 0.1885     | -16.29 to 16.67    | No           | ns      |
| TRA+RT vs. TRA+CT    | 6.672      | -9.807 to 23.15    | No           | ns      |

- CTL
- OB
- ▲ TRF
- ▼ TRF+AT
- ◆ TRF+RT
- TRF+CT

**B.**

Saturated Fatty Acids

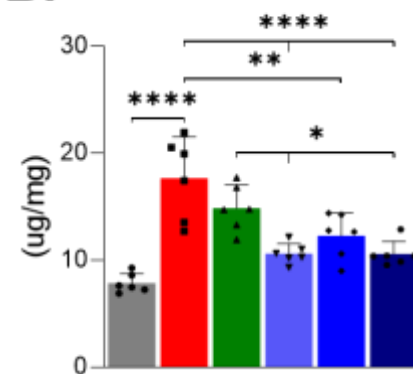

| CTL    | OB      | TRF     | TRA+AT  | TRA+RT  | TRA+CT  |
|--------|---------|---------|---------|---------|---------|
| 8.5825 | 19.9363 | 17.7159 | 10.6035 | 14.3785 | 10.3548 |
| 6.8892 | 20.5396 | 13.2878 | 10.1844 | 12.6344 | 12.8567 |
| 7.4638 | 13.5027 | 11.9172 | 12.1447 | 12.7518 | 10.3769 |
| 9.2620 | 21.9296 | 14.7100 | 11.0166 | 10.5994 | 9.5493  |
| 7.2440 | 17.4411 | 14.7523 | 9.3101  | 8.9784  | 9.8307  |
| 7.6087 | 12.6991 | 16.8079 | 10.2644 | 14.2375 | 10.3837 |

Shapiro-Wilk test

|                       |        |        |        |        |        |        |
|-----------------------|--------|--------|--------|--------|--------|--------|
| W                     | 0.9097 | 0.8976 | 0.9639 | 0.9654 | 0.9093 | 0.7521 |
| P value               | 0.4346 | 0.3601 | 0.8489 | 0.8601 | 0.4318 | 0.0209 |
| Passed normality test | Yes    | Yes    | Yes    | Yes    | Yes    | No     |
| P value summary       | ns     | ns     | ns     | ns     | ns     | *      |

Ordinary one-way ANOVA  
ANOVA results

| Tukey's multiple com | Mean Diff. | 95.00% CI of diff. | Significant? | Summary |
|----------------------|------------|--------------------|--------------|---------|
| CTL vs. OB           | -9.833     | -13.55 to -6.114   | Yes          | ****    |
| CTL vs. TRF          | -7.023     | -10.74 to -3.305   | Yes          | ****    |
| CTL vs. TRA+AT       | -2.746     | -6.464 to 0.9732   | No           | ns      |
| CTL vs. TRA+RT       | -4.422     | -8.140 to -0.7028  | Yes          | *       |
| CTL vs. TRA+CT       | -2.717     | -6.436 to 1.002    | No           | ns      |
| OB vs. TRF           | 2.810      | -0.9092 to 6.528   | No           | ns      |
| OB vs. TRA+AT        | 7.087      | 3.369 to 10.81     | Yes          | ****    |
| OB vs. TRA+RT        | 5.411      | 1.693 to 9.130     | Yes          | **      |
| OB vs. TRA+CT        | 7.116      | 3.397 to 10.83     | Yes          | ****    |
| TRF vs. TRA+AT       | 4.278      | 0.5591 to 7.997    | Yes          | *       |
| TRF vs. TRA+RT       | 2.602      | -1.117 to 6.321    | No           | ns      |
| TRF vs. TRA+CT       | 4.307      | 0.5877 to 8.025    | Yes          | *       |
| TRA+AT vs. TRA+RT    | -1.676     | -5.395 to 2.043    | No           | ns      |
| TRA+AT vs. TRA+CT    | 0.02860    | -3.690 to 3.747    | No           | ns      |
| TRA+RT vs. TRA+CT    | 1.705      | -2.014 to 5.423    | No           | ns      |

# Figure 6

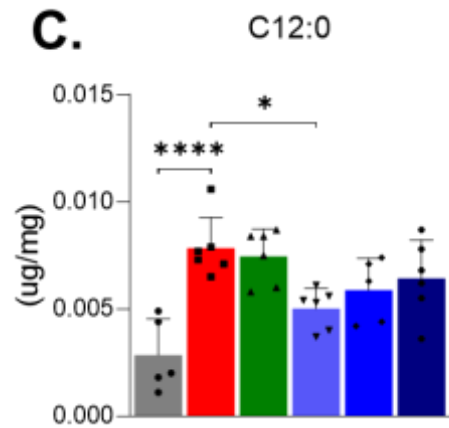

| CTL    | OB     | TRF    | TRA+AT | TRA+RT | TRA+CT |
|--------|--------|--------|--------|--------|--------|
| 0.0049 | 0.0071 | 0.0084 | 0.0053 | 0.0044 | 0.0055 |
| 0.0011 | 0.0077 | 0.0087 | 0.0037 | 0.0063 | 0.0068 |
| 0.0018 | 0.0073 | 0.0060 | 0.0056 | 0.0074 | 0.0087 |
| 0.0020 | 0.0065 | 0.0075 | 0.0061 | 0.0042 | 0.0078 |
| 0.0044 | 0.0079 | 0.0084 | 0.0054 | 0.0071 | 0.0062 |
|        | 0.0106 | 0.0058 | 0.0040 |        | 0.0036 |

| Shapiro-Wilk test     |        |        |        |        |        |        |
|-----------------------|--------|--------|--------|--------|--------|--------|
| W                     | 0.8652 | 0.8163 | 0.8364 | 0.8882 | 0.8589 | 0.9832 |
| P value               | 0.2474 | 0.0819 | 0.1216 | 0.3090 | 0.2245 | 0.9662 |
| Passed normality test | Yes    | Yes    | Yes    | Yes    | Yes    | Yes    |
| P value summary       | ns     | ns     | ns     | ns     | ns     | ns     |

## Ordinary one-way ANOVA ANOVA results

| Tukey's multiple comp | Mean Diff. | 95.00% CI of diff.      | Significant? | Summary |
|-----------------------|------------|-------------------------|--------------|---------|
| CTL vs. OB            | -0.005010  | -0.007709 to -0.002311  | Yes          | ****    |
| CTL vs. TRF           | -0.004627  | -0.007325 to -0.001928  | Yes          | ***     |
| CTL vs. TRA+AT        | -0.002177  | -0.004875 to 0.0005219  | No           | ns      |
| CTL vs. TRA+RT        | -0.003040  | -0.005859 to -0.0002214 | Yes          | *       |
| CTL vs. TRA+CT        | -0.003593  | -0.006292 to -0.0008948 | Yes          | **      |
| OB vs. TRF            | 0.0003833  | -0.002190 to 0.002956   | No           | ns      |
| OB vs. TRA+AT         | 0.002833   | 0.0002603 to 0.005406   | Yes          | *       |
| OB vs. TRA+RT         | 0.001970   | -0.0007286 to 0.004669  | No           | ns      |
| OB vs. TRA+CT         | 0.001417   | -0.001156 to 0.003990   | No           | ns      |
| TRF vs. TRA+AT        | 0.002450   | -0.0001230 to 0.005023  | No           | ns      |
| TRF vs. TRA+RT        | 0.001587   | -0.001112 to 0.004285   | No           | ns      |
| TRF vs. TRA+CT        | 0.001033   | -0.001540 to 0.003606   | No           | ns      |
| TRA+AT vs. TRA+RT     | -0.0008633 | -0.003562 to 0.001835   | No           | ns      |
| TRA+AT vs. TRA+CT     | -0.001417  | -0.003990 to 0.001156   | No           | ns      |
| TRA+RT vs. TRA+CT     | -0.0005533 | -0.003252 to 0.002145   | No           | ns      |

- CTL
- OB
- ▲ TRF
- ▼ TRF+AT
- ◆ TRF+RT
- TRF+CT

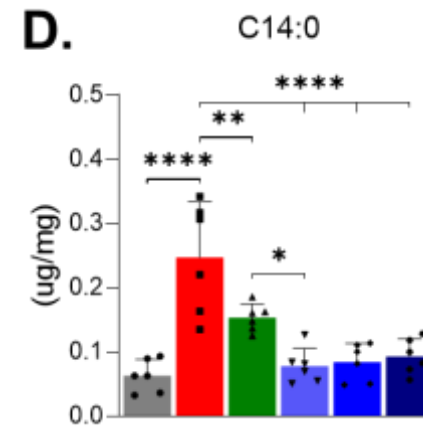

| CTL    | OB     | TRF    | TRA+AT | TRA+RT | TRA+CT |
|--------|--------|--------|--------|--------|--------|
| 0.0894 | 0.3171 | 0.1483 | 0.0838 | 0.1136 | 0.1182 |
| 0.0625 | 0.3067 | 0.1369 | 0.0694 | 0.0485 | 0.1281 |
| 0.0361 | 0.1631 | 0.1252 | 0.1266 | 0.1002 | 0.0996 |
| 0.0930 | 0.3424 | 0.1608 | 0.0812 | 0.1106 | 0.0564 |
| 0.0625 | 0.2204 | 0.1622 | 0.0506 | 0.0818 | 0.0727 |
| 0.0321 | 0.1347 | 0.1858 | 0.0549 | 0.0501 | 0.0824 |

| Shapiro-Wilk test     |        |        |        |        |        |        |
|-----------------------|--------|--------|--------|--------|--------|--------|
| W                     | 0.8943 | 0.8962 | 0.9779 | 0.8944 | 0.8581 | 0.9662 |
| P value               | 0.3415 | 0.3522 | 0.9407 | 0.3418 | 0.1828 | 0.8663 |
| Passed normality test | Yes    | Yes    | Yes    | Yes    | Yes    | Yes    |
| P value summary       | ns     | ns     | ns     | ns     | ns     | ns     |

## Ordinary one-way ANOVA ANOVA results

| Tukey's multiple comp | Mean Diff. | 95.00% CI of diff.   | Significant? | Summary |
|-----------------------|------------|----------------------|--------------|---------|
| CTL vs. OB            | -0.1848    | -0.2602 to -0.1094   | Yes          | ****    |
| CTL vs. TRF           | -0.09060   | -0.1660 to -0.01522  | Yes          | *       |
| CTL vs. TRA+AT        | -0.01515   | -0.09053 to 0.06023  | No           | ns      |
| CTL vs. TRA+RT        | -0.02153   | -0.09692 to 0.05385  | No           | ns      |
| CTL vs. TRA+CT        | -0.03030   | -0.1057 to 0.04508   | No           | ns      |
| OB vs. TRF            | 0.09420    | 0.01882 to 0.1696    | Yes          | **      |
| OB vs. TRA+AT         | 0.1697     | 0.09427 to 0.2450    | Yes          | ****    |
| OB vs. TRA+RT         | 0.1633     | 0.08788 to 0.2387    | Yes          | ****    |
| OB vs. TRA+CT         | 0.1545     | 0.07912 to 0.2299    | Yes          | ****    |
| TRF vs. TRA+AT        | 0.07545    | 6.508e-005 to 0.1508 | Yes          | *       |
| TRF vs. TRA+RT        | 0.06907    | -0.006318 to 0.1445  | No           | ns      |
| TRF vs. TRA+CT        | 0.06030    | -0.01508 to 0.1357   | No           | ns      |
| TRA+AT vs. TRA+RT     | -0.006383  | -0.08177 to 0.06900  | No           | ns      |
| TRA+AT vs. TRA+CT     | -0.01515   | -0.09053 to 0.06023  | No           | ns      |
| TRA+RT vs. TRA+CT     | -0.008767  | -0.08415 to 0.06662  | No           | ns      |

# Figure 6

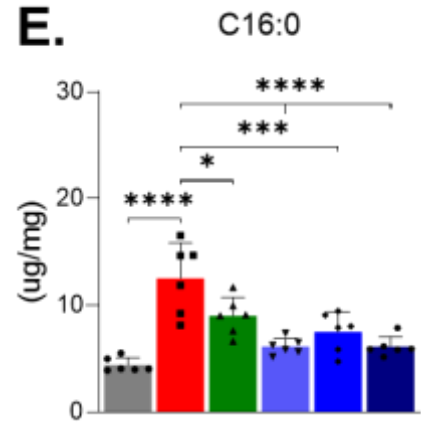

| CTL    | OB      | TRF     | TRA+AT | TRA+RT | TRA+CT |
|--------|---------|---------|--------|--------|--------|
| 4.9899 | 14.6997 | 6.6469  | 6.2504 | 9.0876 | 5.8782 |
| 3.9231 | 14.6731 | 9.0262  | 5.6671 | 8.0475 | 7.8878 |
| 3.9988 | 9.2446  | 7.6146  | 7.3759 | 7.9097 | 5.9153 |
| 5.5025 | 16.5432 | 9.9600  | 6.5481 | 5.8637 | 5.1520 |
| 4.0442 | 11.8968 | 9.1072  | 5.1837 | 4.7377 | 5.8321 |
| 4.0588 | 8.1492  | 11.6815 | 5.8543 | 9.4558 | 6.1541 |

| Shapiro-Wilk test     |        |        |        |        |        |        |
|-----------------------|--------|--------|--------|--------|--------|--------|
| W                     | 0.7649 | 0.9223 | 0.9775 | 0.9783 | 0.9117 | 0.8086 |
| P value               | 0.0277 | 0.5222 | 0.9387 | 0.9427 | 0.4480 | 0.0702 |
| Passed normality test | No     | Yes    | Yes    | Yes    | Yes    | Yes    |
| P value summary       | *      | ns     | ns     | ns     | ns     | ns     |

## Ordinary one-way ANOVA ANOVA results

| Tukey's multiple com | Mean Diff. | 95.00% CI of diff. | Significant? | Summary |
|----------------------|------------|--------------------|--------------|---------|
| CTL vs. OB           | -8.115     | -11.29 to -4.943   | Yes          | ****    |
| CTL vs. TRF          | -4.587     | -7.758 to -1.415   | Yes          | **      |
| CTL vs. TRA+AT       | -1.727     | -4.899 to 1.445    | No           | ns      |
| CTL vs. TRA+RT       | -3.097     | -6.269 to 0.07410  | No           | ns      |
| CTL vs. TRA+CT       | -1.717     | -4.889 to 1.455    | No           | ns      |
| OB vs. TRF           | 3.528      | 0.3568 to 6.700    | Yes          | *       |
| OB vs. TRA+AT        | 6.388      | 3.216 to 9.559     | Yes          | ****    |
| OB vs. TRA+RT        | 5.017      | 1.846 to 8.189     | Yes          | ***     |
| OB vs. TRA+CT        | 6.398      | 3.226 to 9.569     | Yes          | ****    |
| TRF vs. TRA+AT       | 2.859      | -0.3121 to 6.031   | No           | ns      |
| TRF vs. TRA+RT       | 1.489      | -1.682 to 4.661    | No           | ns      |
| TRF vs. TRA+CT       | 2.869      | -0.3021 to 6.041   | No           | ns      |
| TRA+AT vs. TRA+RT    | -1.370     | -4.542 to 1.801    | No           | ns      |
| TRA+AT vs. TRA+CT    | 0.01000    | -3.162 to 3.182    | No           | ns      |
| TRA+RT vs. TRA+CT    | 1.380      | -1.791 to 4.552    | No           | ns      |

- CTL
- OB
- ▲ TRF
- ▼ TRF+AT
- ◆ TRF+RT
- TRF+CT

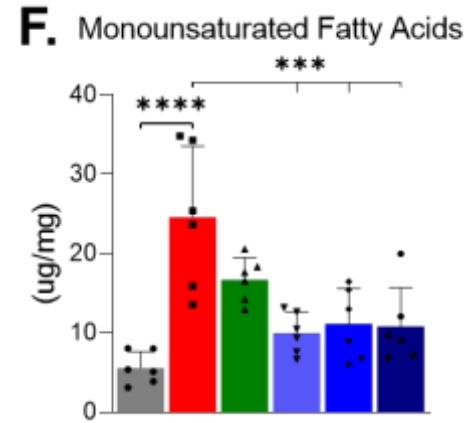

| CTL    | OB      | TRF     | TRA+AT  | TRA+RT  | TRA+CT  |
|--------|---------|---------|---------|---------|---------|
| 8.0083 | 34.8582 | 12.9417 | 7.6235  | 16.4865 | 9.7031  |
| 5.1235 | 25.4229 | 18.3431 | 9.3963  | 6.0702  | 12.0809 |
| 3.8829 | 15.9443 | 14.2587 | 10.4959 | 15.4536 | 6.9083  |
| 8.0519 | 34.3098 | 17.6398 | 13.1785 | 13.0285 | 7.2261  |
| 5.3867 | 23.6729 | 16.5551 | 12.6443 | 9.0556  | 9.0899  |
| 3.1257 | 13.5811 | 20.5790 | 6.6590  | 6.8669  | 19.9915 |

| Shapiro-Wilk test     |        |        |        |        |        |        |
|-----------------------|--------|--------|--------|--------|--------|--------|
| W                     | 0.8939 | 0.9075 | 0.9774 | 0.9408 | 0.9031 | 0.8176 |
| P value               | 0.3393 | 0.4204 | 0.9379 | 0.6653 | 0.3924 | 0.0841 |
| Passed normality test | Yes    | Yes    | Yes    | Yes    | Yes    | Yes    |
| P value summary       | ns     | ns     | ns     | ns     | ns     | ns     |

## Ordinary one-way ANOVA ANOVA results

| Tukey's multiple com | Mean Diff. | 95.00% CI of diff. | Significant? | Summary |
|----------------------|------------|--------------------|--------------|---------|
| CTL vs. OB           | -19.04     | -27.57 to -10.50   | Yes          | ****    |
| CTL vs. TRF          | -11.12     | -19.66 to -2.586   | Yes          | **      |
| CTL vs. TRA+AT       | -4.403     | -12.94 to 4.134    | No           | ns      |
| CTL vs. TRA+RT       | -5.564     | -14.10 to 2.973    | No           | ns      |
| CTL vs. TRA+CT       | -5.237     | -13.77 to 3.300    | No           | ns      |
| OB vs. TRF           | 7.912      | -0.6250 to 16.45   | No           | ns      |
| OB vs. TRA+AT        | 14.63      | 6.095 to 23.17     | Yes          | ***     |
| OB vs. TRA+RT        | 13.47      | 4.934 to 22.01     | Yes          | ***     |
| OB vs. TRA+CT        | 13.80      | 5.261 to 22.34     | Yes          | ***     |
| TRF vs. TRA+AT       | 6.720      | -1.817 to 15.26    | No           | ns      |
| TRF vs. TRA+RT       | 5.559      | -2.978 to 14.10    | No           | ns      |
| TRF vs. TRA+CT       | 5.886      | -2.651 to 14.42    | No           | ns      |
| TRA+AT vs. TRA+RT    | -1.161     | -9.698 to 7.376    | No           | ns      |
| TRA+AT vs. TRA+CT    | -0.8337    | -9.371 to 7.703    | No           | ns      |
| TRA+RT vs. TRA+CT    | 0.3269     | -8.210 to 8.864    | No           | ns      |

# Figure 6

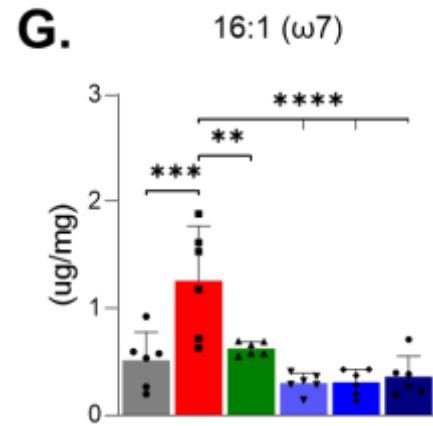

| CTL    | OB     | TRF    | TRA+AT | TRA+RT | TRA+CT |
|--------|--------|--------|--------|--------|--------|
| 0.0651 | 1.3709 | 0.4065 | 0.2038 | 0.3972 | 0.1689 |
| 0.2471 | 1.0190 | 0.6348 | 0.2198 | 0.1016 | 0.2541 |
| 0.0983 | 0.5525 | 0.4800 | 0.2942 | 0.3627 | 0.1218 |
| 0.0669 | 1.6888 | 0.5673 | 0.2931 | 0.3004 | 0.1459 |
|        | 0.8167 | 0.4472 | 0.1265 | 0.1625 | 0.2072 |
|        | 2.0015 | 0.8730 | 0.1217 | 0.1079 | 0.5021 |

| Shapiro-Wilk test     |    |        |        |        |        |        |        |
|-----------------------|----|--------|--------|--------|--------|--------|--------|
| W                     |    | 0.7561 | 0.9727 | 0.8898 | 0.8758 | 0.8713 | 0.7935 |
| P value               |    | 0.0440 | 0.9099 | 0.3170 | 0.2504 | 0.2313 | 0.0514 |
| Passed normality test | No | Yes    | Yes    | Yes    | Yes    | Yes    | Yes    |
| P value summary       | *  | ns     | ns     | ns     | ns     | ns     | ns     |

## Ordinary one-way ANOVA

ANOVA results

| Tukey's multiple com | Mean Diff | 95.00% CI of diff. | Significant? | Summary |
|----------------------|-----------|--------------------|--------------|---------|
| CTL vs. OB           | -1.122    | -1.633 to -0.6111  | Yes          | ****    |
| CTL vs. TRF          | -0.4488   | -0.9599 to 0.06234 | No           | ns      |
| CTL vs. TRA+AT       | -0.09050  | -0.6016 to 0.4206  | No           | ns      |
| CTL vs. TRA+RT       | -0.1194   | -0.6305 to 0.3918  | No           | ns      |
| CTL vs. TRA+CT       | -0.1140   | -0.6251 to 0.3971  | No           | ns      |
| OB vs. TRF           | 0.6734    | 0.2163 to 1.131    | Yes          | **      |
| OB vs. TRA+AT        | 1.032     | 0.5746 to 1.489    | Yes          | ****    |
| OB vs. TRA+RT        | 1.003     | 0.5457 to 1.460    | Yes          | ****    |
| OB vs. TRA+CT        | 1.008     | 0.5511 to 1.465    | Yes          | ****    |
| TRF vs. TRA+AT       | 0.3583    | -0.09888 to 0.8154 | No           | ns      |
| TRF vs. TRA+RT       | 0.3294    | -0.1277 to 0.7866  | No           | ns      |
| TRF vs. TRA+CT       | 0.3348    | -0.1224 to 0.7920  | No           | ns      |
| TRA+AT vs. TRA+RT    | -0.02887  | -0.4860 to 0.4283  | No           | ns      |
| TRA+AT vs. TRA+CT    | -0.02348  | -0.4806 to 0.4337  | No           | ns      |
| TRA+RT vs. TRA+CT    | 0.005383  | -0.4518 to 0.4625  | No           | ns      |

- CTL
- OB
- ▲ TRF
- ▼ TRF+AT
- ◆ TRF+RT
- TRF+CT

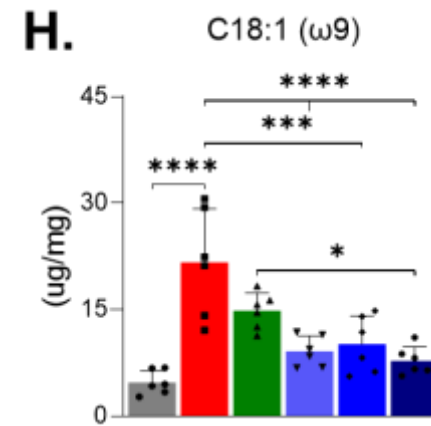

| CTL    | OB      | TRF     | TRA+AT  | TRA+RT  | TRA+CT  |
|--------|---------|---------|---------|---------|---------|
| 6.7141 | 30.6112 | 11.3271 | 6.9158  | 14.8333 | 8.7535  |
| 4.2474 | 22.4144 | 16.3313 | 8.4748  | 5.5938  | 11.0891 |
| 3.3950 | 14.1741 | 12.5698 | 9.4338  | 14.0471 | 6.6365  |
| 6.8196 | 29.4244 | 15.7124 | 11.8276 | 11.8436 | 5.6696  |
| 4.4886 | 21.1936 | 14.6187 | 11.4432 | 8.2152  | 6.4541  |
| 2.7284 | 12.1105 | 18.3170 | 6.8032  | 6.2560  | 8.1945  |

| Shapiro-Wilk test     |     |        |        |        |        |        |        |
|-----------------------|-----|--------|--------|--------|--------|--------|--------|
| W                     |     | 0.8928 | 0.9194 | 0.9777 | 0.8964 | 0.8960 | 0.9298 |
| P value               |     | 0.3334 | 0.5008 | 0.9395 | 0.3529 | 0.3508 | 0.5786 |
| Passed normality test | Yes | Yes    | Yes    | Yes    | Yes    | Yes    | Yes    |
| P value summary       | ns  | ns     | ns     | ns     | ns     | ns     | ns     |

## Ordinary one-way ANOVA

ANOVA results

| Tukey's multiple com | Mean Diff. | 95.00% CI of diff. | Significant? | Summary |
|----------------------|------------|--------------------|--------------|---------|
| CTL vs. OB           | -16.92     | -23.78 to -10.06   | Yes          | ****    |
| CTL vs. TRF          | -10.08     | -16.94 to -3.218   | Yes          | **      |
| CTL vs. TRA+AT       | -4.418     | -11.28 to 2.445    | No           | ns      |
| CTL vs. TRA+RT       | -5.399     | -12.26 to 1.463    | No           | ns      |
| CTL vs. TRA+CT       | -3.067     | -9.930 to 3.795    | No           | ns      |
| OB vs. TRF           | 6.842      | -0.02037 to 13.70  | No           | ns      |
| OB vs. TRA+AT        | 12.50      | 5.643 to 19.37     | Yes          | ****    |
| OB vs. TRA+RT        | 11.52      | 4.661 to 18.39     | Yes          | ***     |
| OB vs. TRA+CT        | 13.86      | 6.993 to 20.72     | Yes          | ****    |
| TRF vs. TRA+AT       | 5.663      | -1.199 to 12.53    | No           | ns      |
| TRF vs. TRA+RT       | 4.681      | -2.181 to 11.54    | No           | ns      |
| TRF vs. TRA+CT       | 7.013      | 0.1508 to 13.88    | Yes          | *       |
| TRA+AT vs. TRA+RT    | -0.9818    | -7.844 to 5.881    | No           | ns      |
| TRA+AT vs. TRA+CT    | 1.350      | -5.512 to 8.213    | No           | ns      |
| TRA+RT vs. TRA+CT    | 2.332      | -4.530 to 9.194    | No           | ns      |



# Figure 7

## A. Polyunsaturated Fatty Acids

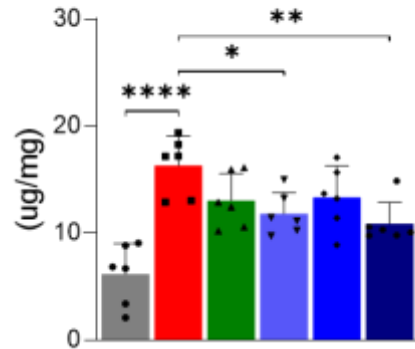

| CTL    | OB      | TRF     | TRA+AT  | TRA+RT  | TRA+CT  |
|--------|---------|---------|---------|---------|---------|
| 9.0628 | 18.2802 | 15.9419 | 9.7324  | 15.6749 | 10.3014 |
| 3.3932 | 17.1919 | 10.1823 | 10.2705 | 13.6809 | 14.8575 |
| 2.0811 | 13.0468 | 12.8962 | 11.1426 | 13.2281 | 10.5519 |
| 8.8376 | 19.3827 | 10.5745 | 14.9947 | 11.4181 | 9.7783  |
| 6.6999 | 17.1505 | 16.1113 | 13.2642 | 8.8937  | 10.0516 |
| 6.8296 | 12.8827 | 12.4478 | 11.4548 | 17.0680 | 9.7661  |

| Shapiro-Wilk test     |     |        |        |        |        |        |        |
|-----------------------|-----|--------|--------|--------|--------|--------|--------|
| W                     |     | 0.8946 | 0.8587 | 0.8843 | 0.9262 | 0.9811 | 0.6360 |
| P value               |     | 0.3431 | 0.1848 | 0.2895 | 0.5510 | 0.9569 | 0.0012 |
| Passed normality test | Yes | Yes    | Yes    | Yes    | Yes    | Yes    | No     |
| P value summary       | ns  | ns     | ns     | ns     | ns     | ns     | **     |

### Ordinary one-way ANOVA ANOVA results

| Tukey's multiple com | Mean Diff. | 95.00% CI of diff. | Significant? | Summary |
|----------------------|------------|--------------------|--------------|---------|
| CTL vs. OB           | -10.17     | -14.62 to -5.727   | Yes          | ****    |
| CTL vs. TRF          | -6.875     | -11.32 to -2.431   | Yes          | ***     |
| CTL vs. TRA+AT       | -5.659     | -10.10 to -1.215   | Yes          | **      |
| CTL vs. TRA+RT       | -7.177     | -11.62 to -2.732   | Yes          | ***     |
| CTL vs. TRA+CT       | -4.734     | -9.178 to -0.2894  | Yes          | *       |
| OB vs. TRF           | 3.297      | -1.148 to 7.741    | No           | ns      |
| OB vs. TRA+AT        | 4.513      | 0.06824 to 8.957   | Yes          | *       |
| OB vs. TRA+RT        | 2.995      | -1.449 to 7.440    | No           | ns      |
| OB vs. TRA+CT        | 5.438      | 0.9936 to 9.882    | Yes          | **      |
| TRF vs. TRA+AT       | 1.216      | -3.229 to 5.660    | No           | ns      |
| TRF vs. TRA+RT       | -0.3016    | -4.746 to 4.143    | No           | ns      |
| TRF vs. TRA+CT       | 2.141      | -2.303 to 6.586    | No           | ns      |
| TRA+AT vs. TRA+RT    | -1.517     | -5.962 to 2.927    | No           | ns      |
| TRA+AT vs. TRA+CT    | 0.9254     | -3.519 to 5.370    | No           | ns      |
| TRA+RT vs. TRA+CT    | 2.443      | -2.002 to 6.887    | No           | ns      |

- CTL
- OB
- ▲ TRF
- ▼ TRF+AT
- ◆ TRF+RT
- TRF+CT

## B. Total Fatty Acids (ω6)

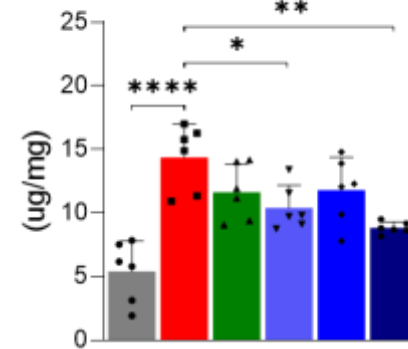

| CTL    | OB      | TRF     | TRA+AT  | TRA+RT  | TRA+CT |
|--------|---------|---------|---------|---------|--------|
| 7.8464 | 16.2745 | 14.1849 | 8.7507  | 13.9028 | 9.1858 |
| 3.1392 | 15.7850 | 9.0665  | 9.1311  | 12.2988 | 9.5196 |
| 1.9283 | 11.3437 | 11.9310 | 9.8244  | 12.0755 | 8.6405 |
| 7.5386 | 17.0154 | 9.4043  | 13.4083 | 9.8805  | 8.8265 |
| 5.8099 | 14.9035 | 14.0622 | 11.5804 | 7.8069  | 8.1825 |
| 6.1754 | 10.9256 | 11.1771 | 9.7422  | 14.8022 | 8.6945 |

| Shapiro-Wilk test     |     |        |        |        |        |        |        |
|-----------------------|-----|--------|--------|--------|--------|--------|--------|
| W                     |     | 0.9030 | 0.8522 | 0.8969 | 0.8761 | 0.9549 | 0.9764 |
| P value               |     | 0.3923 | 0.1638 | 0.3561 | 0.2517 | 0.7799 | 0.9321 |
| Passed normality test | Yes | Yes    | Yes    | Yes    | Yes    | Yes    | Yes    |
| P value summary       | ns  | ns     | ns     | ns     | ns     | ns     | ns     |

### Ordinary one-way ANOVA ANOVA results

| Tukey's multiple com | Mean Diff. | 95.00% CI of diff. | Significant? | Summary |
|----------------------|------------|--------------------|--------------|---------|
| CTL vs. OB           | -8.968     | -12.72 to -5.220   | Yes          | ****    |
| CTL vs. TRF          | -6.231     | -9.980 to -2.483   | Yes          | ***     |
| CTL vs. TRA+AT       | -5.000     | -8.748 to -1.251   | Yes          | **      |
| CTL vs. TRA+RT       | -6.388     | -10.14 to -2.640   | Yes          | ***     |
| CTL vs. TRA+CT       | -3.435     | -7.184 to 0.3132   | No           | ns      |
| OB vs. TRF           | 2.737      | -1.011 to 6.485    | No           | ns      |
| OB vs. TRA+AT        | 3.968      | 0.2200 to 7.717    | Yes          | *       |
| OB vs. TRA+RT        | 2.580      | -1.168 to 6.329    | No           | ns      |
| OB vs. TRA+CT        | 5.533      | 1.785 to 9.281     | Yes          | **      |
| TRF vs. TRA+AT       | 1.231      | -2.517 to 4.980    | No           | ns      |
| TRF vs. TRA+RT       | -0.1568    | -3.905 to 3.592    | No           | ns      |
| TRF vs. TRA+CT       | 2.796      | -0.9523 to 6.545   | No           | ns      |
| TRA+AT vs. TRA+RT    | -1.388     | -5.137 to 2.360    | No           | ns      |
| TRA+AT vs. TRA+CT    | 1.565      | -2.184 to 5.313    | No           | ns      |
| TRA+RT vs. TRA+CT    | 2.953      | -0.7955 to 6.701   | No           | ns      |



# Figure 7

## C. Total Fatty Acids ( $\omega$ 3)

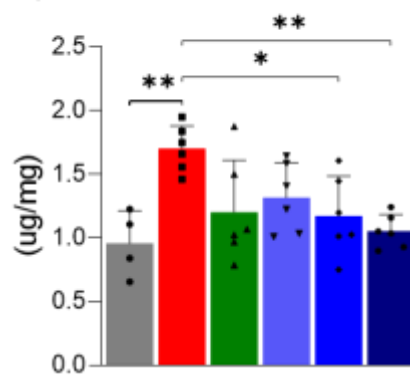

| CTL    | OB     | TRF    | TRA+AT | TRA+RT | TRA+CT |
|--------|--------|--------|--------|--------|--------|
| 1.1063 | 1.4618 | 1.5001 | 1.0354 | 1.6068 | 1.0351 |
| 1.2250 | 1.6594 | 0.9704 | 1.2262 | 0.7504 | 1.2426 |
| 0.8405 | 1.5580 | 0.7871 | 1.4077 | 1.1983 | 1.0501 |
| 0.6542 | 1.9516 | 1.0231 | 1.5844 | 1.0262 | 1.1585 |
|        | 1.7495 | 1.8755 | 1.0093 | 1.4470 | 0.8993 |
|        | 1.8356 | 1.0683 | 1.6423 | 1.0137 | 0.9276 |

| Shapiro-Wilk test     |     |        |        |        |        |        |
|-----------------------|-----|--------|--------|--------|--------|--------|
| W                     |     | 0.9557 | 0.9877 | 0.8883 | 0.9057 | 0.9657 |
| P value               |     | 0.7516 | 0.9827 | 0.3095 | 0.4085 | 0.8621 |
| Passed normality test | Yes | Yes    | Yes    | Yes    | Yes    | Yes    |
| P value summary       | ns  | ns     | ns     | ns     | ns     | ns     |

### Ordinary one-way ANOVA ANOVA results

| Tukey's multiple com | Mean Diff. | 95.00% CI of diff. | Significant? | Summary |
|----------------------|------------|--------------------|--------------|---------|
| CTL vs. OB           | -0.7462    | -1.289 to -0.2029  | Yes          | **      |
| CTL vs. TRF          | -0.2476    | -0.7909 to 0.2957  | No           | ns      |
| CTL vs. TRA+AT       | -0.3611    | -0.9043 to 0.1822  | No           | ns      |
| CTL vs. TRA+RT       | -0.2172    | -0.7605 to 0.3261  | No           | ns      |
| CTL vs. TRA+CT       | -0.09570   | -0.6390 to 0.4476  | No           | ns      |
| OB vs. TRF           | 0.4986     | 0.01263 to 0.9845  | Yes          | *       |
| OB vs. TRA+AT        | 0.3851     | -0.1008 to 0.8710  | No           | ns      |
| OB vs. TRA+RT        | 0.5289     | 0.04298 to 1.015   | Yes          | *       |
| OB vs. TRA+CT        | 0.6505     | 0.1645 to 1.136    | Yes          | **      |
| TRF vs. TRA+AT       | -0.1135    | -0.5994 to 0.3725  | No           | ns      |
| TRF vs. TRA+RT       | 0.03035    | -0.4556 to 0.5163  | No           | ns      |
| TRF vs. TRA+CT       | 0.1519     | -0.3341 to 0.6378  | No           | ns      |
| TRA+AT vs. TRA+RT    | 0.1438     | -0.3421 to 0.6298  | No           | ns      |
| TRA+AT vs. TRA+CT    | 0.2654     | -0.2206 to 0.7513  | No           | ns      |
| TRA+RT vs. TRA+CT    | 0.1215     | -0.3644 to 0.6075  | No           | ns      |

- CTL
- OB
- ▲ TRF
- ▼ TRF+AT
- ◆ TRF+RT
- TRF+CT

## D. C18:2 ( $\omega$ 6)

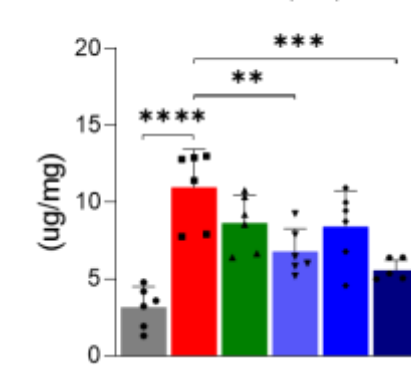

| CTL    | OB      | TRF     | TRA+AT | TRA+RT  | TRA+CT |
|--------|---------|---------|--------|---------|--------|
| 4.7881 | 12.8116 | 10.7688 | 5.2074 | 9.9973  | 6.3886 |
| 1.9248 | 12.9004 | 6.6502  | 5.8407 | 9.4618  | 6.4067 |
| 1.3090 | 7.9264  | 9.2024  | 6.4771 | 8.7541  | 5.2492 |
| 4.1955 | 13.0055 | 6.4149  | 9.2529 | 6.7919  | 5.0521 |
| 3.2390 | 7.7768  | 10.3552 | 7.9143 | 4.5807  | 5.0099 |
| 3.5957 | 11.4075 | 8.5823  | 6.0297 | 10.9453 | 5.3544 |

| Shapiro-Wilk test     |     |        |        |        |        |        |
|-----------------------|-----|--------|--------|--------|--------|--------|
| W                     |     | 0.9520 | 0.7710 | 0.9080 | 0.9101 | 0.9306 |
| P value               |     | 0.7566 | 0.0318 | 0.4236 | 0.4371 | 0.5848 |
| Passed normality test | Yes | No     | Yes    | Yes    | Yes    | No     |
| P value summary       | ns  | *      | ns     | ns     | ns     | *      |

### Ordinary one-way ANOVA ANOVA results

| Tukey's multiple com | Mean Diff. | 95.00% CI of diff. | Significant? | Summary |
|----------------------|------------|--------------------|--------------|---------|
| CTL vs. OB           | -7.796     | -10.96 to -4.631   | Yes          | ****    |
| CTL vs. TRF          | -5.487     | -8.652 to -2.322   | Yes          | ***     |
| CTL vs. TRA+AT       | -3.612     | -6.777 to -0.4467  | Yes          | *       |
| CTL vs. TRA+RT       | -5.247     | -8.411 to -2.082   | Yes          | ***     |
| CTL vs. TRA+CT       | -2.401     | -5.566 to 0.7635   | No           | ns      |
| OB vs. TRF           | 2.309      | -0.8559 to 5.474   | No           | ns      |
| OB vs. TRA+AT        | 4.184      | 1.019 to 7.349     | Yes          | **      |
| OB vs. TRA+RT        | 2.550      | -0.6154 to 5.714   | No           | ns      |
| OB vs. TRA+CT        | 5.395      | 2.230 to 8.560     | Yes          | ***     |
| TRF vs. TRA+AT       | 1.875      | -1.290 to 5.040    | No           | ns      |
| TRF vs. TRA+RT       | 0.2405     | -2.925 to 3.405    | No           | ns      |
| TRF vs. TRA+CT       | 3.085      | -0.07947 to 6.250  | No           | ns      |
| TRA+AT vs. TRA+RT    | -1.635     | -4.800 to 1.530    | No           | ns      |
| TRA+AT vs. TRA+CT    | 1.210      | -1.955 to 4.375    | No           | ns      |
| TRA+RT vs. TRA+CT    | 2.845      | -0.3199 to 6.010   | No           | ns      |

# Figure 7

E.

C20:4 ( $\omega$ 6)

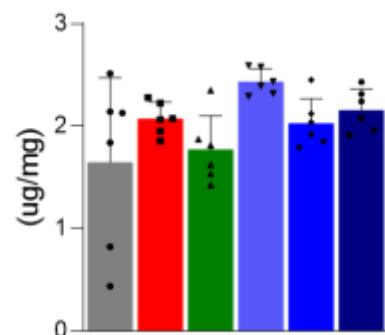

| CTL    | OB     | TRF    | TRA+AT | TRA+RT | TRA+CT |
|--------|--------|--------|--------|--------|--------|
| 2.1408 | 1.9506 | 1.8129 | 2.3182 | 1.7945 | 1.9101 |
| 0.8222 | 2.2239 | 1.4264 | 2.4349 | 1.8509 | 2.0752 |
| 0.4352 | 1.8537 | 1.5358 | 2.3904 | 1.9203 | 2.4314 |
| 2.5141 | 2.2781 | 1.8729 | 2.5909 | 2.0391 | 2.2423 |
| 1.8376 | 2.0634 | 2.3512 | 2.2912 | 2.4509 | 2.3143 |
| 2.1276 | 2.0739 | 1.6242 | 2.5799 | 2.1223 | 1.9624 |

| Shapiro-Wilk test     |     |        |        |        |        |        |
|-----------------------|-----|--------|--------|--------|--------|--------|
| W                     |     | 0.8797 | 0.9599 | 0.9153 | 0.8939 | 0.9070 |
| P value               |     | 0.2676 | 0.8190 | 0.4724 | 0.3391 | 0.4169 |
| Passed normality test | Yes | Yes    | Yes    | Yes    | Yes    | Yes    |
| P value summary       | ns  | ns     | ns     | ns     | ns     | ns     |

Ordinary one-way ANOVA  
ANOVA results

| Tukey's multiple com | Mean Diff. | 95.00% CI of diff. | Significant? | Summary |
|----------------------|------------|--------------------|--------------|---------|
| CTL vs. OB           | -0.4277    | -1.120 to 0.2647   | No           | ns      |
| CTL vs. TRF          | -0.1243    | -0.8167 to 0.5681  | No           | ns      |
| CTL vs. TRA+AT       | -0.7880    | -1.480 to -0.09560 | Yes          | *       |
| CTL vs. TRA+RT       | -0.3834    | -1.076 to 0.3090   | No           | ns      |
| CTL vs. TRA+CT       | -0.5097    | -1.202 to 0.1827   | No           | ns      |
| OB vs. TRF           | 0.3034     | -0.3890 to 0.9958  | No           | ns      |
| OB vs. TRA+AT        | -0.3603    | -1.053 to 0.3321   | No           | ns      |
| OB vs. TRA+RT        | 0.04427    | -0.6481 to 0.7367  | No           | ns      |
| OB vs. TRA+CT        | -0.08202   | -0.7744 to 0.6104  | No           | ns      |
| TRF vs. TRA+AT       | -0.6637    | -1.356 to 0.02871  | No           | ns      |
| TRF vs. TRA+RT       | -0.2591    | -0.9515 to 0.4333  | No           | ns      |
| TRF vs. TRA+CT       | -0.3854    | -1.078 to 0.3070   | No           | ns      |
| TRA+AT vs. TRA+RT    | 0.4046     | -0.2878 to 1.097   | No           | ns      |
| TRA+AT vs. TRA+CT    | 0.2783     | -0.4141 to 0.9707  | No           | ns      |
| TRA+RT vs. TRA+CT    | -0.1263    | -0.8187 to 0.5661  | No           | ns      |

- CTL
- OB
- ▲ TRF
- ▼ TRF+AT
- ◆ TRF+RT
- TRF+CT

F.

C18:3 ( $\omega$ 3)

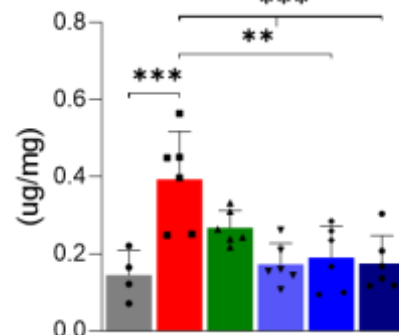

| CTL    | OB     | TRF    | TRA+AT | TRA+RT | TRA+CT |
|--------|--------|--------|--------|--------|--------|
| 0.2209 | 0.4502 | 0.3317 | 0.1077 | 0.2846 | 0.1681 |
| 0.1649 | 0.2504 | 0.2429 | 0.1547 | 0.0940 | 0.3036 |
| 0.1213 | 0.4489 | 0.2378 | 0.1592 | 0.2590 | 0.2076 |
| 0.0710 | 0.2477 | 0.2170 | 0.2613 | 0.2354 | 0.1168 |
|        | 0.3967 | 0.3100 | 0.2095 | 0.1669 | 0.1181 |
|        | 0.5641 | 0.2634 | 0.1442 | 0.0997 | 0.1358 |

| Shapiro-Wilk test     |     |        |        |        |        |        |
|-----------------------|-----|--------|--------|--------|--------|--------|
| W                     |     | 0.9973 | 0.9045 | 0.9200 | 0.9360 | 0.8920 |
| P value               |     | 0.9909 | 0.4011 | 0.5051 | 0.6270 | 0.3287 |
| Passed normality test | Yes | Yes    | Yes    | Yes    | Yes    | Yes    |
| P value summary       | ns  | ns     | ns     | ns     | ns     | ns     |

Ordinary one-way ANOVA  
ANOVA results

| Tukey's multiple com | Mean Diff. | 95.00% CI of diff.  | Significant? | Summary |
|----------------------|------------|---------------------|--------------|---------|
| CTL vs. OB           | -0.2485    | -0.4038 to -0.09318 | Yes          | ***     |
| CTL vs. TRF          | -0.1226    | -0.2779 to 0.03268  | No           | ns      |
| CTL vs. TRA+AT       | -0.02824   | -0.1835 to 0.1271   | No           | ns      |
| CTL vs. TRA+RT       | -0.04541   | -0.2007 to 0.1099   | No           | ns      |
| CTL vs. TRA+CT       | -0.03048   | -0.1858 to 0.1248   | No           | ns      |
| OB vs. TRF           | 0.1259     | -0.01303 to 0.2648  | No           | ns      |
| OB vs. TRA+AT        | 0.2202     | 0.08134 to 0.3591   | Yes          | ***     |
| OB vs. TRA+RT        | 0.2031     | 0.06417 to 0.3420   | Yes          | **      |
| OB vs. TRA+CT        | 0.2180     | 0.07910 to 0.3569   | Yes          | ***     |
| TRF vs. TRA+AT       | 0.09437    | -0.04453 to 0.2333  | No           | ns      |
| TRF vs. TRA+RT       | 0.07720    | -0.06170 to 0.2161  | No           | ns      |
| TRF vs. TRA+CT       | 0.09213    | -0.04676 to 0.2310  | No           | ns      |
| TRA+AT vs. TRA+RT    | -0.01717   | -0.1561 to 0.1217   | No           | ns      |
| TRA+AT vs. TRA+CT    | -0.002233  | -0.1411 to 0.1367   | No           | ns      |
| TRA+RT vs. TRA+CT    | 0.01493    | -0.1240 to 0.1538   | No           | ns      |

# Figure 7

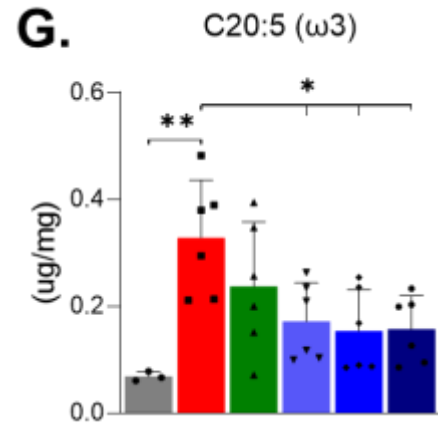

| CTL    | OB     | TRF    | TRA+AT | TRA+RT | TRA+CT |
|--------|--------|--------|--------|--------|--------|
| 0.0670 | 0.2132 | 0.3947 | 0.0997 | 0.2357 | 0.2333 |
| 0.0783 | 0.2950 | 0.2002 | 0.1180 | 0.0899 | 0.1993 |
| 0.0609 | 0.3900 | 0.1512 | 0.2633 | 0.1690 | 0.0946 |
|        | 0.4827 | 0.2567 | 0.2097 | 0.0853 | 0.1264 |
|        | 0.2114 | 0.0713 | 0.1037 | 0.2544 | 0.2031 |
|        | 0.3805 | 0.3480 | 0.2351 | 0.0875 | 0.0857 |

| Shapiro-Wilk test     |        |        |        |        |        |        |
|-----------------------|--------|--------|--------|--------|--------|--------|
| W                     | 0.9711 | 0.9187 | 0.9751 | 0.8495 | 0.8186 | 0.8839 |
| P value               | 0.6737 | 0.4961 | 0.9247 | 0.1559 | 0.0858 | 0.2877 |
| Passed normality test | Yes    | Yes    | Yes    | Yes    | Yes    | Yes    |
| P value summary       | ns     | ns     | ns     | ns     | ns     | ns     |

## Ordinary one-way ANOVA ANOVA results

| Tukey's multiple com | Mean Diff. | 95.00% CI of diff.  | Significant? | Summary |
|----------------------|------------|---------------------|--------------|---------|
| CTL vs. OB           | -0.2601    | -0.4505 to -0.06958 | Yes          | **      |
| CTL vs. TRF          | -0.1683    | -0.3588 to 0.02220  | No           | ns      |
| CTL vs. TRA+AT       | -0.1029    | -0.2933 to 0.08763  | No           | ns      |
| CTL vs. TRA+RT       | -0.08490   | -0.2754 to 0.1056   | No           | ns      |
| CTL vs. TRA+CT       | -0.08833   | -0.2788 to 0.1021   | No           | ns      |
| OB vs. TRF           | 0.09178    | -0.06375 to 0.2473  | No           | ns      |
| OB vs. TRA+AT        | 0.1572     | 0.001688 to 0.3127  | Yes          | *       |
| OB vs. TRA+RT        | 0.1752     | 0.01964 to 0.3307   | Yes          | *       |
| OB vs. TRA+CT        | 0.1717     | 0.01620 to 0.3273   | Yes          | *       |
| TRF vs. TRA+AT       | 0.06543    | -0.09010 to 0.2210  | No           | ns      |
| TRF vs. TRA+RT       | 0.08338    | -0.07215 to 0.2389  | No           | ns      |
| TRF vs. TRA+CT       | 0.07995    | -0.07558 to 0.2355  | No           | ns      |
| TRA+AT vs. TRA+RT    | 0.01795    | -0.1376 to 0.1735   | No           | ns      |
| TRA+AT vs. TRA+CT    | 0.01452    | -0.1410 to 0.1700   | No           | ns      |
| TRA+RT vs. TRA+CT    | -0.003433  | -0.1590 to 0.1521   | No           | ns      |

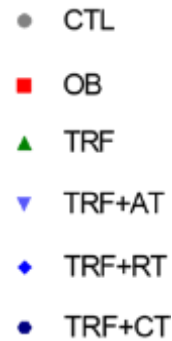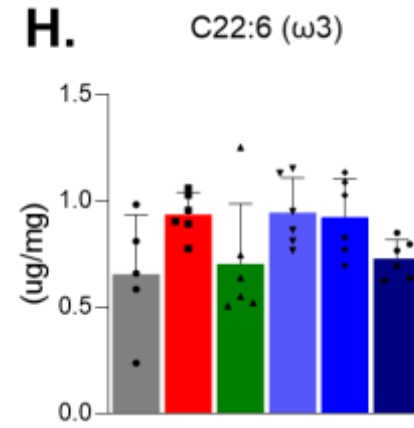

| CTL    | OB     | TRF    | TRA+AT | TRA+RT | TRA+CT |
|--------|--------|--------|--------|--------|--------|
| 0.8092 | 0.8916 | 0.7444 | 0.7661 | 1.0865 | 0.6338 |
| 0.2353 | 0.9033 | 0.5048 | 0.9490 | 0.7703 | 0.6245 |
| 0.9819 | 1.0269 | 0.5195 | 0.8615 | 0.6944 | 0.7962 |
| 0.6583 | 0.7741 | 0.6371 | 1.1515 | 1.0257 | 0.8491 |
| 0.5831 | 1.0597 | 1.2520 | 0.8106 | 0.8264 | 0.7653 |
|        | 0.9555 | 0.5499 | 1.1300 | 1.1329 | 0.6921 |

| Shapiro-Wilk test     |        |        |        |        |        |        |
|-----------------------|--------|--------|--------|--------|--------|--------|
| W                     | 0.9725 | 0.9621 | 0.7525 | 0.8897 | 0.9069 | 0.9284 |
| P value               | 0.8909 | 0.8355 | 0.0211 | 0.3166 | 0.4165 | 0.5676 |
| Passed normality test | Yes    | Yes    | No     | Yes    | Yes    | Yes    |
| P value summary       | ns     | ns     | *      | ns     | ns     | ns     |

## Ordinary one-way ANOVA ANOVA results

| Tukey's multiple com | Mean Diff. | 95.00% CI of diff. | Significant? | Summary |
|----------------------|------------|--------------------|--------------|---------|
| CTL vs. OB           | -0.2816    | -0.6429 to 0.07964 | No           | ns      |
| CTL vs. TRF          | -0.04772   | -0.4090 to 0.3135  | No           | ns      |
| CTL vs. TRA+AT       | -0.2912    | -0.6525 to 0.07004 | No           | ns      |
| CTL vs. TRA+RT       | -0.2691    | -0.6304 to 0.09212 | No           | ns      |
| CTL vs. TRA+CT       | -0.07327   | -0.4345 to 0.2880  | No           | ns      |
| OB vs. TRF           | 0.2339     | -0.1106 to 0.5784  | No           | ns      |
| OB vs. TRA+AT        | -0.009600  | -0.3541 to 0.3349  | No           | ns      |
| OB vs. TRA+RT        | 0.01248    | -0.3320 to 0.3569  | No           | ns      |
| OB vs. TRA+CT        | 0.2084     | -0.1361 to 0.5528  | No           | ns      |
| TRF vs. TRA+AT       | -0.2435    | -0.5880 to 0.1010  | No           | ns      |
| TRF vs. TRA+RT       | -0.2214    | -0.5659 to 0.1230  | No           | ns      |
| TRF vs. TRA+CT       | -0.02555   | -0.3700 to 0.3189  | No           | ns      |
| TRA+AT vs. TRA+RT    | 0.02208    | -0.3224 to 0.3665  | No           | ns      |
| TRA+AT vs. TRA+CT    | 0.2180     | -0.1265 to 0.5624  | No           | ns      |
| TRA+RT vs. TRA+CT    | 0.1959     | -0.1486 to 0.5403  | No           | ns      |

Figure 7

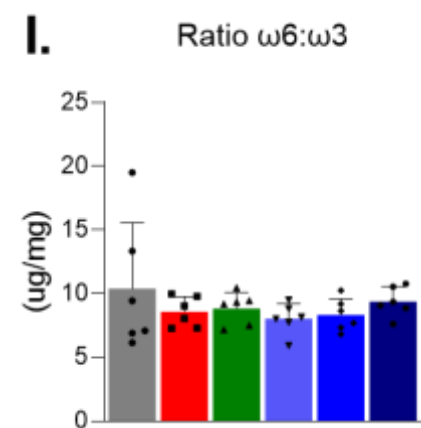

| CTL   | OB   | TRF   | TRA+AT | TRA+RT | TRA+CT |
|-------|------|-------|--------|--------|--------|
| 7.09  | 9.81 | 9.46  | 8.82   | 8.65   | 8.87   |
| 13.34 | 7.28 | 9.34  | 8.01   | 9.20   | 10.79  |
| 19.51 | 8.06 | 9.19  | 9.52   | 10.26  | 7.62   |
| 6.15  | 9.98 | 7.50  | 8.16   | 6.83   | 9.10   |
| 6.91  | 9.05 | 10.46 | 5.93   | 7.70   | 9.37   |
| 9.44  | 7.31 | 7.17  | 7.75   | 7.34   | 10.55  |

| Shapiro-Wilk test     |        |        |        |        |        |        |
|-----------------------|--------|--------|--------|--------|--------|--------|
| W                     | 0.8404 | 0.8774 | 0.9010 | 0.9353 | 0.9626 | 0.9450 |
| P value               | 0.1314 | 0.2575 | 0.3797 | 0.6214 | 0.8392 | 0.6995 |
| Passed normality test | Yes    | Yes    | Yes    | Yes    | Yes    | Yes    |
| P value summary       | ns     | ns     | ns     | ns     | ns     | ns     |

| Tukey's multiple com | Mean Diff. | 95.00% CI of diff. | Significant? | Summary |
|----------------------|------------|--------------------|--------------|---------|
| CTL vs. OB           | 1.825      | -2.372 to 6.022    | No           | ns      |
| CTL vs. TRF          | 1.553      | -2.643 to 5.750    | No           | ns      |
| CTL vs. TRA+AT       | 2.375      | -1.822 to 6.572    | No           | ns      |
| CTL vs. TRA+RT       | 2.077      | -2.120 to 6.273    | No           | ns      |
| CTL vs. TRA+CT       | 1.023      | -3.173 to 5.220    | No           | ns      |
| OB vs. TRF           | -0.2717    | -4.468 to 3.925    | No           | ns      |
| OB vs. TRA+AT        | 0.5500     | -3.647 to 4.747    | No           | ns      |
| OB vs. TRA+RT        | 0.2517     | -3.945 to 4.448    | No           | ns      |
| OB vs. TRA+CT        | -0.8017    | -4.998 to 3.395    | No           | ns      |
| TRF vs. TRA+AT       | 0.8217     | -3.375 to 5.018    | No           | ns      |
| TRF vs. TRA+RT       | 0.5233     | -3.673 to 4.720    | No           | ns      |
| TRF vs. TRA+CT       | -0.5300    | -4.727 to 3.667    | No           | ns      |
| TRA+AT vs. TRA+RT    | -0.2983    | -4.495 to 3.898    | No           | ns      |
| TRA+AT vs. TRA+CT    | -1.352     | -5.548 to 2.845    | No           | ns      |
| TRA+RT vs. TRA+CT    | -1.053     | -5.250 to 3.143    | No           | ns      |

● CTL   ■ OB   ▲ TRF   ▼ TRF+AT   ◆ TRF+RT   ● TRF+CT



Figure 8

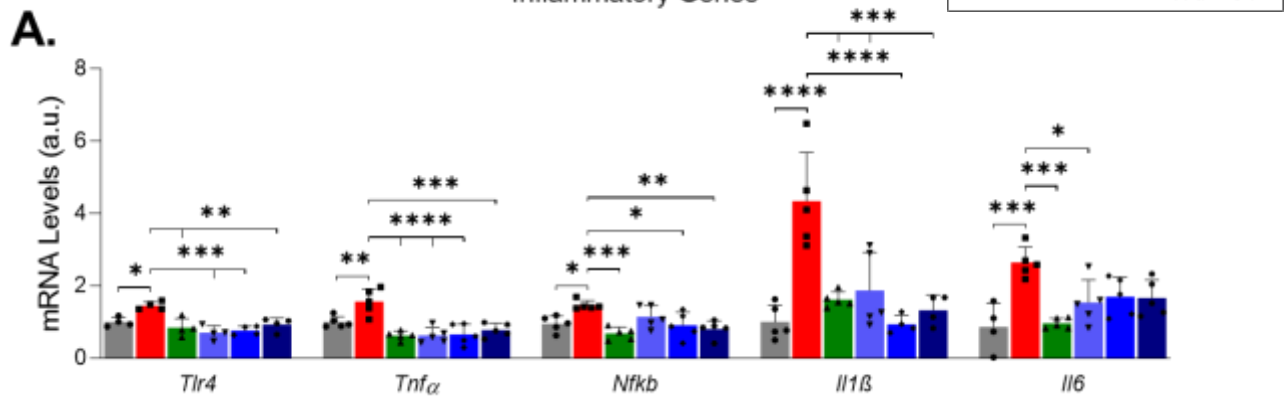

| Grouped     | TRF         |             |             |             |             |
|-------------|-------------|-------------|-------------|-------------|-------------|
|             | C:1         | C:2         | C:3         | C:4         | C:5         |
| <i>Tlr4</i> | 0.775665000 | 1.195293000 | 0.585766000 | 0.824620000 |             |
| <i>Tnfα</i> | 0.779614241 | 0.433563372 | 0.672566175 | 0.603347615 | 0.634300873 |
| <i>Nfkb</i> | 0.722971833 | 0.486422439 | 0.531443496 | 0.907237826 | 0.759359042 |
| <i>Il1β</i> | 1.963942000 | 1.514743000 | 1.397507000 | 1.664067000 | 1.559952000 |
| <i>Il6</i>  | 0.830766824 | 0.908143163 | 1.110533506 | 1.133341170 | 0.830764627 |

| Grouped     | TRF+AT      |             |             |             |             |
|-------------|-------------|-------------|-------------|-------------|-------------|
|             | D:1         | D:2         | D:3         | D:4         | D:5         |
| <i>Tlr4</i> | 0.944677000 | 0.688362000 | 0.470909000 | 0.708541000 |             |
| <i>Tnfα</i> | 0.976602654 | 0.585703073 | 0.691499706 | 0.436707557 | 0.474516276 |
| <i>Nfkb</i> | 0.984321680 | 0.764756681 | 1.467257296 | 1.075563958 | 1.470066904 |
| <i>Il1β</i> | 2.910490000 | 1.154949000 | 3.120118000 | 0.920258000 | 1.272690000 |
| <i>Il6</i>  | 1.501482655 | 1.607654821 | 0.840219748 | 1.224754071 | 2.533820790 |

| Grouped     | TRF+RT      |             |             |             |             |
|-------------|-------------|-------------|-------------|-------------|-------------|
|             | E:1         | E:2         | E:3         | E:4         | E:5         |
| <i>Tlr4</i> | 0.667359000 | 0.642309000 | 0.886057000 | 0.863333000 |             |
| <i>Tnfα</i> | 0.296005258 | 0.607769670 | 0.499467958 | 0.954632382 | 0.937612616 |
| <i>Nfkb</i> | 0.886488670 | 1.168731457 | 0.744776268 | 0.414714556 | 1.350670793 |
| <i>Il1β</i> | 0.940145000 | 1.283298000 | 0.827755000 | 0.703826000 |             |
| <i>Il6</i>  | 1.221448864 | 2.166159058 | 1.099580729 | 1.768480045 | 2.275991235 |

| Grouped     | TRF+CT      |             |             |             |             |
|-------------|-------------|-------------|-------------|-------------|-------------|
|             | F:1         | F:2         | F:3         | F:4         | F:5         |
| <i>Tlr4</i> | 1.034262000 | 0.658201000 | 0.961277000 | 1.067411000 |             |
| <i>Tnfα</i> | 0.755566213 | 0.931523760 | 0.679097155 | 0.990776010 | 0.529702865 |
| <i>Nfkb</i> | 0.826693316 | 1.053533129 | 0.892507320 | 0.408703310 | 0.851887185 |
| <i>Il1β</i> | 1.679358000 | 1.682570000 | 1.144646000 | 0.826704000 |             |
| <i>Il6</i>  | 2.328828930 | 2.051433961 | 1.271894771 | 1.163989657 | 1.524862325 |

| Grouped     | CTL         |             |             |             |             |
|-------------|-------------|-------------|-------------|-------------|-------------|
|             | A:1         | A:2         | A:3         | A:4         | A:5         |
| <i>Tlr4</i> | 0.874152000 | 1.177432000 | 1.013252000 | 0.935164000 |             |
| <i>Tnfα</i> | 1.256647271 | 1.035285196 | 0.888860086 | 0.879666301 | 0.939541146 |
| <i>Nfkb</i> | 1.190136919 | 0.633313742 | 0.972498958 | 0.863257406 | 1.100273901 |
| <i>Il1β</i> | 0.767611000 | 1.627558000 | 0.737401000 | 1.361904000 | 0.505526000 |
| <i>Il6</i>  | 1.582380111 | 0.023773113 | 1.110101937 | 0.733614804 |             |

| Grouped     | OB          |             |             |             |             |
|-------------|-------------|-------------|-------------|-------------|-------------|
|             | B:1         | B:2         | B:3         | B:4         | B:5         |
| <i>Tlr4</i> | 1.365380000 | 1.372919000 | 1.490283000 | 1.596933000 |             |
| <i>Tnfα</i> | 1.078848814 | 1.390921734 | 1.567655560 | 1.838601229 | 1.970564006 |
| <i>Nfkb</i> | 1.406256486 | 1.427024733 | 1.380290428 | 1.699336849 | 1.428966264 |
| <i>Il1β</i> | 4.645745000 | 3.114929000 | 4.103871000 | 3.371974000 | 6.493309000 |
| <i>Il6</i>  | 2.188404113 | 2.701899943 | 3.326787459 | 2.435350966 | 2.592114952 |



# Figure 8

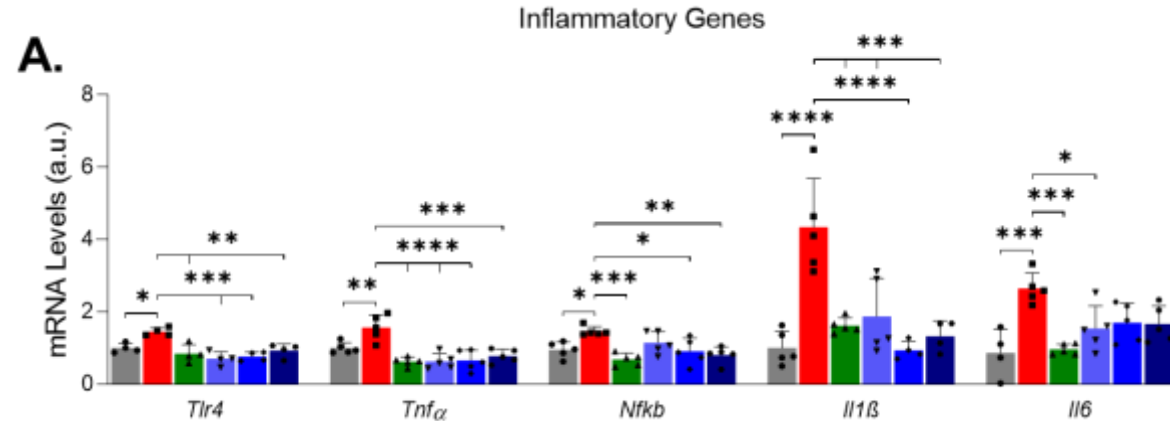

Ordinary one-way ANOVA  
ANOVA results

***Tnfα***

| Tukey's multiple com | Mean Diff. | 95.00% CI of diff. | Significant? | Summary |
|----------------------|------------|--------------------|--------------|---------|
| CTL vs. OB           | -0.5693    | -1.028 to -0.1107  | Yes          | **      |
| CTL vs. TRF          | 0.3753     | -0.08327 to 0.8339 | No           | ns      |
| CTL vs. TRF+AT       | 0.3670     | -0.09159 to 0.8256 | No           | ns      |
| CTL vs. TRF+RT       | 0.3409     | -0.1177 to 0.7995  | No           | ns      |
| CTL vs. TRF+CT       | 0.2227     | -0.2359 to 0.6813  | No           | ns      |
| OB vs. TRF           | 0.9446     | 0.4861 to 1.403    | Yes          | ****    |
| OB vs. TRF+AT        | 0.9363     | 0.4777 to 1.395    | Yes          | ****    |
| OB vs. TRF+RT        | 0.9102     | 0.4516 to 1.369    | Yes          | ****    |
| OB vs. TRF+CT        | 0.7920     | 0.3334 to 1.251    | Yes          | ***     |
| TRF vs. TRF+AT       | -0.008327  | -0.4669 to 0.4503  | No           | ns      |
| TRF vs. TRF+RT       | -0.03442   | -0.4930 to 0.4242  | No           | ns      |
| TRF vs. TRF+CT       | -0.1527    | -0.6112 to 0.3059  | No           | ns      |
| TRF+AT vs. TRF+RT    | -0.02609   | -0.4847 to 0.4325  | No           | ns      |
| TRF+AT vs. TRF+CT    | -0.1443    | -0.6029 to 0.3143  | No           | ns      |
| TRF+RT vs. TRF+CT    | -0.1182    | -0.5768 to 0.3404  | No           | ns      |

Ordinary one-way ANOVA  
ANOVA results

***Tlr4***

| Tukey's multiple com | Mean Diff. | 95.00% CI of diff.  | Significant? | Summary |
|----------------------|------------|---------------------|--------------|---------|
| CTL vs. OB           | -0.4564    | -0.8488 to -0.06392 | Yes          | *       |
| CTL vs. TRF          | 0.1547     | -0.2378 to 0.5471   | No           | ns      |
| CTL vs. TRF+AT       | 0.2969     | -0.09559 to 0.6893  | No           | ns      |
| CTL vs. TRF+RT       | 0.2352     | -0.1572 to 0.6277   | No           | ns      |
| CTL vs. TRF+CT       | 0.06971    | -0.3228 to 0.4622   | No           | ns      |
| OB vs. TRF           | 0.6110     | 0.2186 to 1.004     | Yes          | **      |
| OB vs. TRF+AT        | 0.7533     | 0.3608 to 1.146     | Yes          | ***     |
| OB vs. TRF+RT        | 0.6916     | 0.2992 to 1.084     | Yes          | ***     |
| OB vs. TRF+CT        | 0.5261     | 0.1336 to 0.9186    | Yes          | **      |
| TRF vs. TRF+AT       | 0.1422     | -0.2502 to 0.5347   | No           | ns      |
| TRF vs. TRF+RT       | 0.08057    | -0.3119 to 0.4730   | No           | ns      |
| TRF vs. TRF+CT       | -0.08495   | -0.4774 to 0.3075   | No           | ns      |
| TRF+AT vs. TRF+RT    | -0.06164   | -0.4541 to 0.3308   | No           | ns      |
| TRF+AT vs. TRF+CT    | -0.2272    | -0.6196 to 0.1653   | No           | ns      |
| TRF+RT vs. TRF+CT    | -0.1655    | -0.5580 to 0.2269   | No           | ns      |

Ordinary one-way ANOVA  
ANOVA results

***Nfkb***

| Tukey's multiple com | Mean Diff. | 95.00% CI of diff. | Significant? | Summary |
|----------------------|------------|--------------------|--------------|---------|
| CTL vs. OB           | -0.5165    | -1.009 to -0.02372 | Yes          | *       |
| CTL vs. TRF          | 0.2704     | -0.2224 to 0.7632  | No           | ns      |
| CTL vs. TRF+AT       | -0.2005    | -0.6933 to 0.2923  | No           | ns      |
| CTL vs. TRF+RT       | 0.03882    | -0.4539 to 0.5316  | No           | ns      |
| CTL vs. TRF+CT       | 0.1452     | -0.3475 to 0.6380  | No           | ns      |
| OB vs. TRF           | 0.7869     | 0.2941 to 1.280    | Yes          | ***     |
| OB vs. TRF+AT        | 0.3160     | -0.1768 to 0.8087  | No           | ns      |
| OB vs. TRF+RT        | 0.5553     | 0.06254 to 1.048   | Yes          | *       |
| OB vs. TRF+CT        | 0.6617     | 0.1689 to 1.154    | Yes          | **      |
| TRF vs. TRF+AT       | -0.4709    | -0.9637 to 0.02186 | No           | ns      |
| TRF vs. TRF+RT       | -0.2316    | -0.7244 to 0.2612  | No           | ns      |
| TRF vs. TRF+CT       | -0.1252    | -0.6179 to 0.3676  | No           | ns      |
| TRF+AT vs. TRF+RT    | 0.2393     | -0.2534 to 0.7321  | No           | ns      |
| TRF+AT vs. TRF+CT    | 0.3457     | -0.1470 to 0.8385  | No           | ns      |
| TRF+RT vs. TRF+CT    | 0.1064     | -0.3864 to 0.5992  | No           | ns      |

# Figure 8

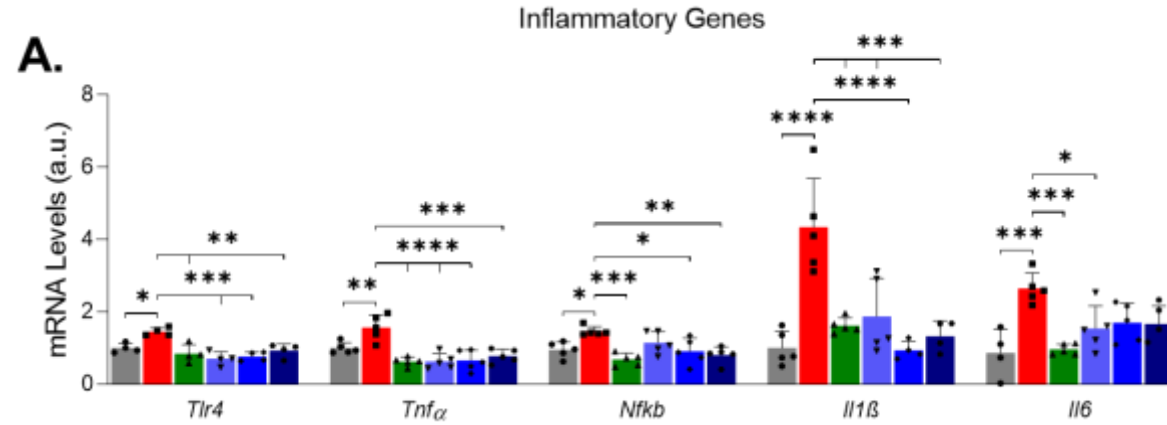

Ordinary one-way ANOVA  
ANOVA results

*Il1β*

| Tukey's multiple comp | Mean Diff. | 95.00% CI of diff. | Significant? | Summary |
|-----------------------|------------|--------------------|--------------|---------|
| CTL vs. OB            | -3.346     | -4.886 to -1.806   | Yes          | *****   |
| CTL vs. TRF           | -0.6200    | -2.160 to 0.9196   | No           | ns      |
| CTL vs. TRF+AT        | -0.8757    | -2.415 to 0.6640   | No           | ns      |
| CTL vs. TRF+RT        | 0.06124    | -1.572 to 1.694    | No           | ns      |
| CTL vs. TRF+CT        | -0.3333    | -1.966 to 1.300    | No           | ns      |
| OB vs. TRF            | 2.726      | 1.186 to 4.266     | Yes          | ***     |
| OB vs. TRF+AT         | 2.470      | 0.9306 to 4.010    | Yes          | ***     |
| OB vs. TRF+RT         | 3.407      | 1.774 to 5.040     | Yes          | *****   |
| OB vs. TRF+CT         | 3.013      | 1.380 to 4.646     | Yes          | ***     |
| TRF vs. TRF+AT        | -0.2557    | -1.795 to 1.284    | No           | ns      |
| TRF vs. TRF+RT        | 0.6813     | -0.9518 to 2.314   | No           | ns      |
| TRF vs. TRF+CT        | 0.2867     | -1.346 to 1.920    | No           | ns      |
| TRF+AT vs. TRF+RT     | 0.9369     | -0.6961 to 2.570   | No           | ns      |
| TRF+AT vs. TRF+CT     | 0.5424     | -1.091 to 2.175    | No           | ns      |
| TRF+RT vs. TRF+CT     | -0.3946    | -2.116 to 1.327    | No           | ns      |

Ordinary one-way ANOVA  
ANOVA results

*Il16*

| Tukey's multiple comp | Mean Diff. | 95.00% CI of diff. | Significant? | Summary |
|-----------------------|------------|--------------------|--------------|---------|
| CTL vs. OB            | -1.786     | -2.836 to -0.7364  | Yes          | ***     |
| CTL vs. TRF           | -0.1002    | -1.150 to 0.9498   | No           | ns      |
| CTL vs. TRF+AT        | -0.6791    | -1.729 to 0.3709   | No           | ns      |
| CTL vs. TRF+RT        | -0.8439    | -1.894 to 0.2062   | No           | ns      |
| CTL vs. TRF+CT        | -0.8057    | -1.856 to 0.2443   | No           | ns      |
| OB vs. TRF            | 1.686      | 0.6962 to 2.676    | Yes          | ***     |
| OB vs. TRF+AT         | 1.107      | 0.1174 to 2.097    | Yes          | *       |
| OB vs. TRF+RT         | 0.9426     | -0.04739 to 1.933  | No           | ns      |
| OB vs. TRF+CT         | 0.9807     | -0.009262 to 1.971 | No           | ns      |
| TRF vs. TRF+AT        | -0.5789    | -1.569 to 0.4111   | No           | ns      |
| TRF vs. TRF+RT        | -0.7436    | -1.734 to 0.2463   | No           | ns      |
| TRF vs. TRF+CT        | -0.7055    | -1.695 to 0.2845   | No           | ns      |
| TRF+AT vs. TRF+RT     | -0.1647    | -1.155 to 0.8252   | No           | ns      |
| TRF+AT vs. TRF+CT     | -0.1266    | -1.117 to 0.8634   | No           | ns      |
| TRF+RT vs. TRF+CT     | 0.03813    | -0.9518 to 1.028   | No           | ns      |

Figure 8

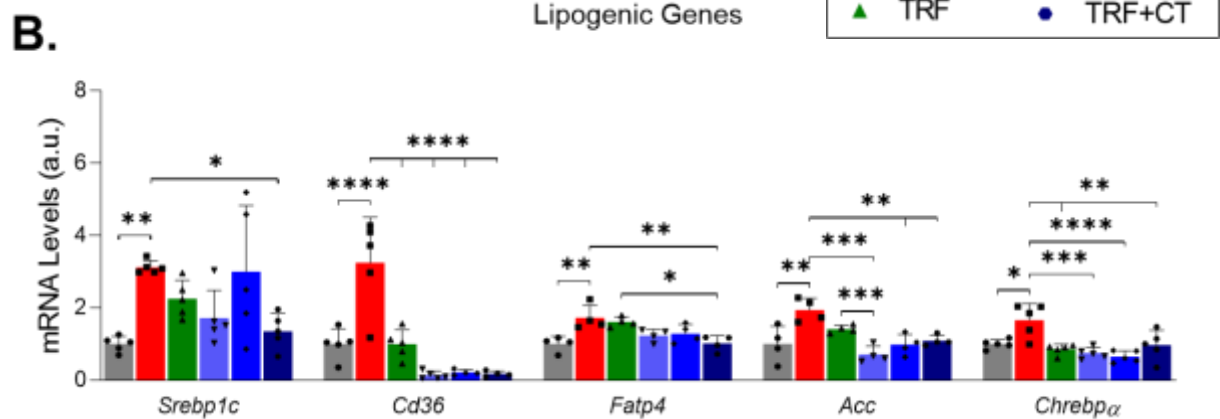

| Grouped        | CTL         |             |             |             |             |
|----------------|-------------|-------------|-------------|-------------|-------------|
|                | A:1         | A:2         | A:3         | A:4         | A:5         |
| <i>Srebp1c</i> | 0.887429097 | 1.260036795 | 0.698314463 | 1.058446800 | 1.095772846 |
| <i>Cd36</i>    | 1.539183000 | 0.992407000 | 1.046716000 | 0.354186000 | 1.067508000 |
| <i>Fatp4</i>   | 1.080762000 | 0.687602000 | 1.055737000 | 1.175899000 |             |
| <i>Acc</i>     | 1.172949000 | 0.381210000 | 0.885310000 | 1.560532000 |             |
| <i>Chrebpα</i> | 1.001702594 | 1.040259434 | 0.971761959 | 0.818659063 | 1.167616950 |

| Grouped        | OB          |             |             |             |             |
|----------------|-------------|-------------|-------------|-------------|-------------|
|                | B:1         | B:2         | B:3         | B:4         | B:5         |
| <i>Srebp1c</i> | 3.129078679 | 3.431894818 | 3.092996792 | 2.987637967 | 2.987637967 |
| <i>Cd36</i>    | 3.720409000 | 4.276095000 | 4.096215000 | 1.183342000 | 2.974420000 |
| <i>Fatp4</i>   | 1.648288000 | 1.471051000 | 2.237158000 | 1.552493000 |             |
| <i>Acc</i>     | 2.283715000 | 1.735957000 | 2.152980000 | 1.607536000 |             |
| <i>Chrebpα</i> | 1.388307466 | 0.997068280 | 1.858027668 | 2.041016123 | 2.035843755 |

| Grouped        | TRF         |             |             |             |             |
|----------------|-------------|-------------|-------------|-------------|-------------|
|                | C:1         | C:2         | C:3         | C:4         | C:5         |
| <i>Srebp1c</i> | 1.675619985 | 2.229656610 | 2.504911738 | 2.973208870 | 1.891796853 |
| <i>Cd36</i>    | 0.466585000 | 0.794205000 | 1.034888000 | 1.129715000 | 1.563987000 |
| <i>Fatp4</i>   | 1.573301000 | 1.627001000 | 1.797030000 | 1.460852000 |             |
| <i>Acc</i>     | 1.295673000 | 1.442031000 | 1.375222000 | 1.554395000 |             |
| <i>Chrebpα</i> | 0.611600164 | 0.930547677 | 0.912867451 | 0.851435745 | 0.973284927 |

| Grouped        | TRF+AT      |             |             |             |             |
|----------------|-------------|-------------|-------------|-------------|-------------|
|                | D:1         | D:2         | D:3         | D:4         | D:5         |
| <i>Srebp1c</i> | 1.524666906 | 1.403664373 | 1.027960421 | 3.037755373 | 1.624019590 |
| <i>Cd36</i>    | 0.059447000 | 0.053646000 | 0.099972000 | 0.170588000 | 0.312912000 |
| <i>Fatp4</i>   | 1.005428000 | 1.344733000 | 1.214765000 | 1.388831000 |             |
| <i>Acc</i>     | 0.526518000 | 0.671413000 | 0.601199000 | 1.048798000 |             |
| <i>Chrebpα</i> | 0.663647339 | 0.986295927 | 0.727300333 | 0.797186050 | 0.576202749 |

| Grouped        | TRF+RT      |             |             |             |             |
|----------------|-------------|-------------|-------------|-------------|-------------|
|                | E:1         | E:2         | E:3         | E:4         | E:5         |
| <i>Srebp1c</i> | 5.196584688 | 2.504126993 | 0.863962080 | 1.850756654 | 4.592780419 |
| <i>Cd36</i>    | 0.201829000 | 0.138165000 | 0.321355000 | 0.195852000 |             |
| <i>Fatp4</i>   | 1.155891000 | 1.418930000 | 1.010577000 | 1.587350000 |             |
| <i>Acc</i>     | 0.894198000 | 1.047267000 | 0.640924000 | 1.338986000 |             |
| <i>Chrebpα</i> | 0.822008665 | 0.544340737 | 0.611958316 | 0.472292867 | 0.811297361 |

| Grouped        | TRF+CT      |             |             |             |             |
|----------------|-------------|-------------|-------------|-------------|-------------|
|                | F:1         | F:2         | F:3         | F:4         | F:5         |
| <i>Srebp1c</i> | 1.961555970 | 1.640182137 | 1.358763536 | 0.657846028 | 1.175292715 |
| <i>Cd36</i>    | 0.151855000 | 0.275235000 | 0.180690000 | 0.093949000 |             |
| <i>Fatp4</i>   | 0.726003000 | 1.191317000 | 0.972259000 | 1.174531000 |             |
| <i>Acc</i>     | 1.059115000 | 1.056511000 | 0.965484000 | 1.309320000 |             |
| <i>Chrebpα</i> | 1.151564798 | 1.009514628 | 1.479747443 | 0.351618768 | 0.847031770 |

# Figure 8

B.

## Lipogenic Genes

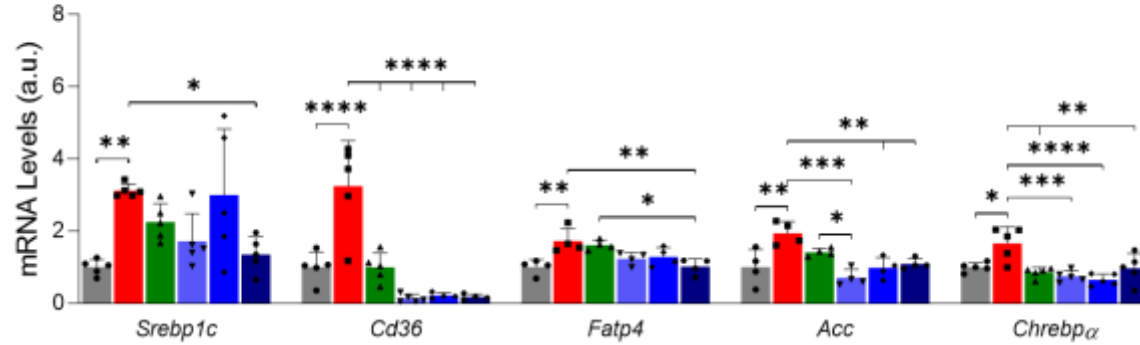

### Ordinary one-way ANOVA ANOVA results

### Cd36

| Tukey's multiple com | Mean Diff. | 95.00% CI of diff. | Significant? | Summary |
|----------------------|------------|--------------------|--------------|---------|
| CTL vs. OB           | -2.250     | -3.423 to -1.077   | Yes          | ****    |
| CTL vs. TRF          | 0.002124   | -1.171 to 1.175    | No           | ns      |
| CTL vs. TRF+AT       | 0.8607     | -0.3121 to 2.034   | No           | ns      |
| CTL vs. TRF+RT       | 0.7857     | -0.4583 to 2.030   | No           | ns      |
| CTL vs. TRF+CT       | 0.8246     | -0.4194 to 2.069   | No           | ns      |
| OB vs. TRF           | 2.252      | 1.079 to 3.425     | Yes          | ****    |
| OB vs. TRF+AT        | 3.111      | 1.938 to 4.284     | Yes          | ****    |
| OB vs. TRF+RT        | 3.036      | 1.792 to 4.280     | Yes          | ****    |
| OB vs. TRF+CT        | 3.075      | 1.831 to 4.319     | Yes          | ****    |
| TRF vs. TRF+AT       | 0.8586     | -0.3143 to 2.031   | No           | ns      |
| TRF vs. TRF+RT       | 0.7836     | -0.4604 to 2.028   | No           | ns      |
| TRF vs. TRF+CT       | 0.8224     | -0.4215 to 2.066   | No           | ns      |
| TRF+AT vs. TRF+RT    | -0.07499   | -1.319 to 1.169    | No           | ns      |
| TRF+AT vs. TRF+CT    | -0.03612   | -1.280 to 1.208    | No           | ns      |
| TRF+RT vs. TRF+CT    | 0.03887    | -1.272 to 1.350    | No           | ns      |

### Ordinary one-way ANOVA ANOVA results

### Srebp1c

| Tukey's multiple com | Mean Diff. | 95.00% CI of diff. | Significant? | Summary |
|----------------------|------------|--------------------|--------------|---------|
| CTL vs. OB           | -2.126     | -3.828 to -0.4237  | Yes          | **      |
| CTL vs. TRF          | -1.255     | -2.957 to 0.4472   | No           | ns      |
| CTL vs. TRF+AT       | -0.7236    | -2.426 to 0.9786   | No           | ns      |
| CTL vs. TRF+RT       | -2.002     | -3.704 to -0.2994  | Yes          | *       |
| CTL vs. TRF+CT       | -0.3587    | -2.061 to 1.343    | No           | ns      |
| OB vs. TRF           | 0.8708     | -0.8314 to 2.573   | No           | ns      |
| OB vs. TRF+AT        | 1.402      | -0.3000 to 3.104   | No           | ns      |
| OB vs. TRF+RT        | 0.1242     | -1.578 to 1.826    | No           | ns      |
| OB vs. TRF+CT        | 1.767      | 0.06493 to 3.469   | Yes          | *       |
| TRF vs. TRF+AT       | 0.5314     | -1.171 to 2.234    | No           | ns      |
| TRF vs. TRF+RT       | -0.7466    | -2.449 to 0.9556   | No           | ns      |
| TRF vs. TRF+CT       | 0.8963     | -0.8059 to 2.599   | No           | ns      |
| TRF+AT vs. TRF+RT    | -1.278     | -2.980 to 0.4242   | No           | ns      |
| TRF+AT vs. TRF+CT    | 0.3649     | -1.337 to 2.067    | No           | ns      |
| TRF+RT vs. TRF+CT    | 1.643      | -0.05928 to 3.345  | No           | ns      |

### Ordinary one-way ANOVA ANOVA results

### Fatp4

| Tukey's multiple com | Mean Diff. | 95.00% CI of diff. | Significant? | Summary |
|----------------------|------------|--------------------|--------------|---------|
| CTL vs. OB           | -0.7272    | -1.255 to -0.1999  | Yes          | **      |
| CTL vs. TRF          | -0.6145    | -1.142 to -0.08724 | Yes          | *       |
| CTL vs. TRF+AT       | -0.2384    | -0.7657 to 0.2889  | No           | ns      |
| CTL vs. TRF+RT       | -0.2932    | -0.8205 to 0.2341  | No           | ns      |
| CTL vs. TRF+CT       | -0.01603   | -0.5433 to 0.5113  | No           | ns      |
| OB vs. TRF           | 0.1127     | -0.4146 to 0.6400  | No           | ns      |
| OB vs. TRF+AT        | 0.4888     | -0.03849 to 1.016  | No           | ns      |
| OB vs. TRF+RT        | 0.4341     | -0.09324 to 0.9614 | No           | ns      |
| OB vs. TRF+CT        | 0.7112     | 0.1839 to 1.239    | Yes          | **      |
| TRF vs. TRF+AT       | 0.3761     | -0.1512 to 0.9034  | No           | ns      |
| TRF vs. TRF+RT       | 0.3214     | -0.2059 to 0.8487  | No           | ns      |
| TRF vs. TRF+CT       | 0.5985     | 0.07122 to 1.126   | Yes          | *       |
| TRF+AT vs. TRF+RT    | -0.05475   | -0.5821 to 0.4726  | No           | ns      |
| TRF+AT vs. TRF+CT    | 0.2224     | -0.3049 to 0.7497  | No           | ns      |
| TRF+RT vs. TRF+CT    | 0.2772     | -0.2501 to 0.8045  | No           | ns      |



# Figure 8

B.

Lipogenic Genes

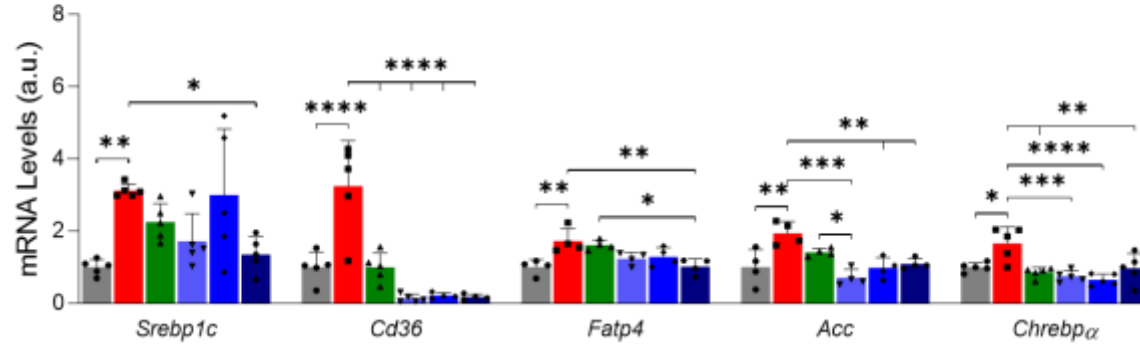

Ordinary one-way ANOVA  
ANOVA results

*Acc*

| Tukey's multiple com | Mean Diff. | 95.00% CI of diff. | Significant? | Summary |
|----------------------|------------|--------------------|--------------|---------|
| CTL vs. OB           | -0.9450    | -1.610 to -0.2804  | Yes          | **      |
| CTL vs. TRF          | -0.4168    | -1.081 to 0.2478   | No           | ns      |
| CTL vs. TRF+AT       | 0.2880     | -0.3766 to 0.9527  | No           | ns      |
| CTL vs. TRF+RT       | 0.01966    | -0.6450 to 0.6843  | No           | ns      |
| CTL vs. TRF+CT       | -0.09761   | -0.7623 to 0.5670  | No           | ns      |
| OB vs. TRF           | 0.5282     | -0.1364 to 1.193   | No           | ns      |
| OB vs. TRF+AT        | 1.233      | 0.5684 to 1.898    | Yes          | ***     |
| OB vs. TRF+RT        | 0.9647     | 0.3000 to 1.629    | Yes          | **      |
| OB vs. TRF+CT        | 0.8474     | 0.1828 to 1.512    | Yes          | **      |
| TRF vs. TRF+AT       | 0.7048     | 0.04019 to 1.370   | Yes          | *       |
| TRF vs. TRF+RT       | 0.4365     | -0.2282 to 1.101   | No           | ns      |
| TRF vs. TRF+CT       | 0.3192     | -0.3454 to 0.9839  | No           | ns      |
| TRF+AT vs. TRF+RT    | -0.2684    | -0.9330 to 0.3963  | No           | ns      |
| TRF+AT vs. TRF+CT    | -0.3856    | -1.050 to 0.2790   | No           | ns      |
| TRF+RT vs. TRF+CT    | -0.1173    | -0.7819 to 0.5474  | No           | ns      |

Ordinary one-way ANOVA  
ANOVA results

*Chrebp*

| Tukey's multiple comp | Mean Diff. | 95.00% CI of diff. | Significant? | Summary |
|-----------------------|------------|--------------------|--------------|---------|
| CTL vs. OB            | -0.6641    | -1.210 to -0.1178  | Yes          | *       |
| CTL vs. TRF           | 0.1441     | -0.4022 to 0.6903  | No           | ns      |
| CTL vs. TRF+AT        | 0.2499     | -0.2963 to 0.7961  | No           | ns      |
| CTL vs. TRF+RT        | 0.3476     | -0.1986 to 0.8938  | No           | ns      |
| CTL vs. TRF+CT        | 0.03210    | -0.5141 to 0.5783  | No           | ns      |
| OB vs. TRF            | 0.8081     | 0.2619 to 1.354    | Yes          | **      |
| OB vs. TRF+AT         | 0.9139     | 0.3677 to 1.460    | Yes          | ***     |
| OB vs. TRF+RT         | 1.012      | 0.4655 to 1.558    | Yes          | ****    |
| OB vs. TRF+CT         | 0.6962     | 0.1500 to 1.242    | Yes          | **      |
| TRF vs. TRF+AT        | 0.1058     | -0.4404 to 0.6520  | No           | ns      |
| TRF vs. TRF+RT        | 0.2036     | -0.3426 to 0.7498  | No           | ns      |
| TRF vs. TRF+CT        | -0.1119    | -0.6582 to 0.4343  | No           | ns      |
| TRF+AT vs. TRF+RT     | 0.09775    | -0.4485 to 0.6440  | No           | ns      |
| TRF+AT vs. TRF+CT     | -0.2178    | -0.7640 to 0.3284  | No           | ns      |
| TRF+RT vs. TRF+CT     | -0.3155    | -0.8617 to 0.2307  | No           | ns      |

Figure 8

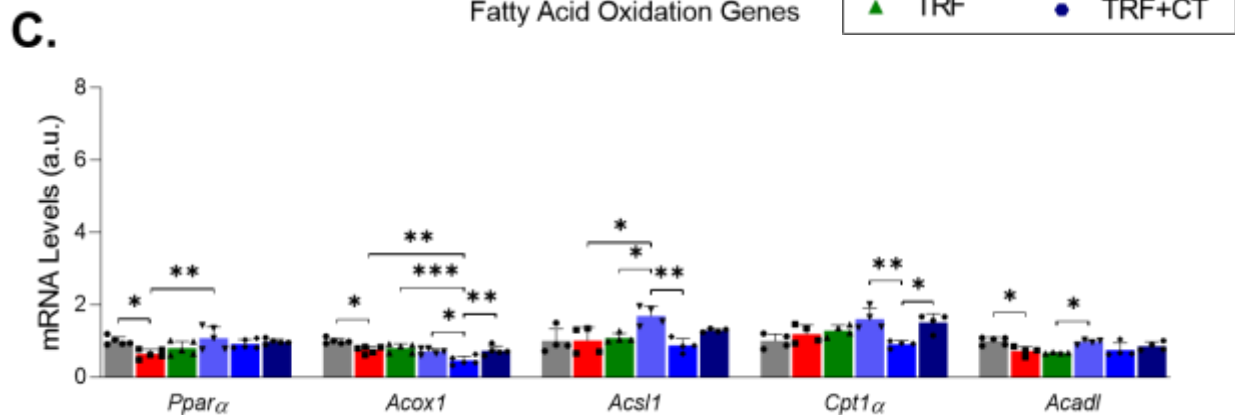

| Grouped      | CTL      |          |          |          |          |
|--------------|----------|----------|----------|----------|----------|
|              | A:1      | A:2      | A:3      | A:4      | A:5      |
| <i>Ppara</i> | 0.941077 | 1.193828 | 0.905997 | 1.033811 | 0.925287 |
| <i>Acox1</i> | 1.005045 | 0.984116 | 0.942039 | 1.131627 | 0.937173 |
| <i>Acsl1</i> | 0.896405 | 0.722213 | 0.875585 | 1.505798 |          |
| <i>Cpt1a</i> | 1.130362 | 0.881100 | 0.779851 | 1.208687 |          |
| <i>Acadl</i> | 1.083813 | 0.867895 | 1.058327 | 1.088911 | 0.901055 |

| Grouped      | OB       |          |          |          |          |
|--------------|----------|----------|----------|----------|----------|
|              | B:1      | B:2      | B:3      | B:4      | B:5      |
| <i>Ppara</i> | 0.589391 | 0.485547 | 0.777501 | 0.759710 | 0.617076 |
| <i>Acox1</i> | 0.689065 | 0.798911 | 0.617283 | 0.829397 | 0.834517 |
| <i>Acsl1</i> | 1.351517 | 1.316895 | 0.705477 | 0.654845 |          |
| <i>Cpt1a</i> | 1.347010 | 0.933466 | 1.469235 | 1.025881 |          |
| <i>Acadl</i> | 0.847781 | 0.746254 | 0.557473 | 0.739554 |          |

| Grouped      | TRF      |          |          |          |          |
|--------------|----------|----------|----------|----------|----------|
|              | C:1      | C:2      | C:3      | C:4      | C:5      |
| <i>Ppara</i> | 1.015883 | 0.607353 | 0.989838 | 0.746536 | 0.649665 |
| <i>Acox1</i> | 0.916749 | 0.669846 | 0.891140 | 0.856200 | 0.670290 |
| <i>Acsl1</i> | 0.994310 | 1.045481 | 1.036690 | 1.279020 |          |
| <i>Cpt1a</i> | 1.457503 | 1.232042 | 1.366466 | 1.094636 |          |
| <i>Acadl</i> | 0.664960 | 0.688023 | 0.655877 | 0.678567 |          |

| Grouped      | TRF+AT   |          |          |          |          |
|--------------|----------|----------|----------|----------|----------|
|              | D:1      | D:2      | D:3      | D:4      | D:5      |
| <i>Ppara</i> | 0.768040 | 1.082055 | 1.356077 | 1.436119 | 0.785690 |
| <i>Acox1</i> | 0.790282 | 0.653688 | 0.710093 | 0.797284 | 0.601874 |
| <i>Acsl1</i> | 1.960135 | 1.884554 | 1.541073 | 1.403958 |          |
| <i>Cpt1a</i> | 1.374495 | 2.017098 | 1.396034 | 1.662628 |          |
| <i>Acadl</i> | 1.012090 | 0.889632 | 0.968824 | 1.038579 |          |

| Grouped      | TRF+RT   |          |          |          |          |
|--------------|----------|----------|----------|----------|----------|
|              | E:1      | E:2      | E:3      | E:4      | E:5      |
| <i>Ppara</i> | 0.819837 | 1.035629 | 0.840565 | 0.817529 | 1.086245 |
| <i>Acox1</i> | 0.532572 | 0.331703 | 0.409616 | 0.403112 | 0.638877 |
| <i>Acsl1</i> | 0.877930 | 1.120128 | 0.859654 | 0.652872 |          |
| <i>Cpt1a</i> | 0.773487 | 0.929028 | 1.005808 | 0.941441 |          |
| <i>Acadl</i> | 0.629113 | 0.653053 | 0.670870 | 1.049262 |          |

| Grouped      | TRF+CT   |          |          |          |          |
|--------------|----------|----------|----------|----------|----------|
|              | F:1      | F:2      | F:3      | F:4      | F:5      |
| <i>Ppara</i> | 0.900893 | 1.006636 | 1.098368 | 0.961272 | 0.954828 |
| <i>Acox1</i> | 0.728245 | 0.938854 | 0.710660 | 0.688630 | 0.596642 |
| <i>Acsl1</i> | 1.270346 | 1.324715 | 1.347046 | 1.250358 |          |
| <i>Cpt1a</i> | 1.158129 | 1.573263 | 1.671292 | 1.677253 |          |
| <i>Acadl</i> | 0.769914 | 1.008141 | 0.895269 | 0.752113 |          |

# Figure 8

C.

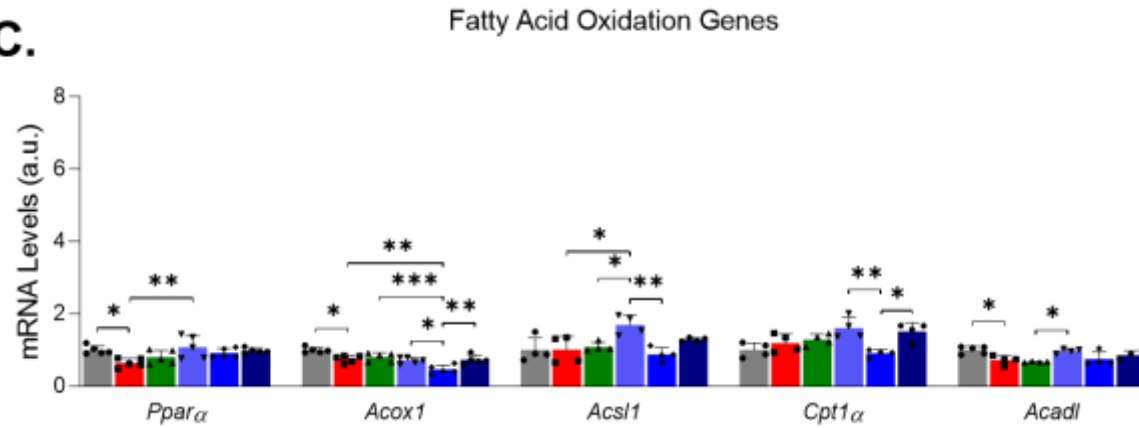

Ordinary one-way ANOVA  
ANOVA results

**Acox1**

| Tukey's multiple com | Mean Diff. | 95.00% CI of diff.  | Significant? | Summary |
|----------------------|------------|---------------------|--------------|---------|
| CTL vs. OB           | 0.2462     | 0.03772 to 0.4546   | Yes          | *       |
| CTL vs. TRF          | 0.1992     | -0.009289 to 0.4076 | No           | ns      |
| CTL vs. TRF+AT       | 0.2894     | 0.08091 to 0.4978   | Yes          | **      |
| CTL vs. TRF+RT       | 0.5368     | 0.3284 to 0.7453    | Yes          | ****    |
| CTL vs. TRF+CT       | 0.2674     | 0.05895 to 0.4758   | Yes          | **      |
| OB vs. TRF           | -0.04701   | -0.2555 to 0.1614   | No           | ns      |
| OB vs. TRF+AT        | 0.04319    | -0.1653 to 0.2516   | No           | ns      |
| OB vs. TRF+RT        | 0.2907     | 0.08221 to 0.4991   | Yes          | **      |
| OB vs. TRF+CT        | 0.02123    | -0.1872 to 0.2297   | No           | ns      |
| TRF vs. TRF+AT       | 0.09020    | -0.1182 to 0.2986   | No           | ns      |
| TRF vs. TRF+RT       | 0.3377     | 0.1292 to 0.5461    | Yes          | ***     |
| TRF vs. TRF+CT       | 0.06824    | -0.1402 to 0.2767   | No           | ns      |
| TRF+AT vs. TRF+RT    | 0.2475     | 0.03902 to 0.4559   | Yes          | *       |
| TRF+AT vs. TRF+CT    | -0.02196   | -0.2304 to 0.1865   | No           | ns      |
| TRF+RT vs. TRF+CT    | -0.2694    | -0.4779 to -0.06099 | Yes          | **      |

Ordinary one-way ANOVA  
ANOVA results

**Ppara**

| Tukey's multiple com | Mean Diff. | 95.00% CI of diff.  | Significant? | Summary |
|----------------------|------------|---------------------|--------------|---------|
| CTL vs. OB           | 0.3542     | 0.01116 to 0.6971   | Yes          | *       |
| CTL vs. TRF          | 0.1981     | -0.1448 to 0.5411   | No           | ns      |
| CTL vs. TRF+AT       | -0.08560   | -0.4286 to 0.2574   | No           | ns      |
| CTL vs. TRF+RT       | 0.08004    | -0.2630 to 0.4230   | No           | ns      |
| CTL vs. TRF+CT       | 0.01560    | -0.3274 to 0.3586   | No           | ns      |
| OB vs. TRF           | -0.1560    | -0.4990 to 0.1870   | No           | ns      |
| OB vs. TRF+AT        | -0.4398    | -0.7827 to -0.09676 | Yes          | **      |
| OB vs. TRF+RT        | -0.2741    | -0.6171 to 0.06888  | No           | ns      |
| OB vs. TRF+CT        | -0.3386    | -0.6815 to 0.004439 | No           | ns      |
| TRF vs. TRF+AT       | -0.2837    | -0.6267 to 0.05925  | No           | ns      |
| TRF vs. TRF+RT       | -0.1181    | -0.4611 to 0.2249   | No           | ns      |
| TRF vs. TRF+CT       | -0.1825    | -0.5255 to 0.1604   | No           | ns      |
| TRF+AT vs. TRF+RT    | 0.1656     | -0.1774 to 0.5086   | No           | ns      |
| TRF+AT vs. TRF+CT    | 0.1012     | -0.2418 to 0.4442   | No           | ns      |
| TRF+RT vs. TRF+CT    | -0.06444   | -0.4074 to 0.2786   | No           | ns      |

Ordinary one-way ANOVA  
ANOVA results

**Acs1**

| Tukey's multiple com | Mean Diff. | 95.00% CI of diff. | Significant? | Summary |
|----------------------|------------|--------------------|--------------|---------|
| CTL vs. OB           | -0.007183  | -0.5799 to 0.5655  | No           | ns      |
| CTL vs. TRF          | -0.08888   | -0.6616 to 0.4838  | No           | ns      |
| CTL vs. TRF+AT       | -0.6974    | -1.270 to -0.1248  | Yes          | *       |
| CTL vs. TRF+RT       | 0.1224     | -0.4503 to 0.6950  | No           | ns      |
| CTL vs. TRF+CT       | -0.2981    | -0.8708 to 0.2746  | No           | ns      |
| OB vs. TRF           | -0.08169   | -0.6544 to 0.4910  | No           | ns      |
| OB vs. TRF+AT        | -0.6902    | -1.263 to -0.1176  | Yes          | *       |
| OB vs. TRF+RT        | 0.1295     | -0.4431 to 0.7022  | No           | ns      |
| OB vs. TRF+CT        | -0.2909    | -0.8636 to 0.2817  | No           | ns      |
| TRF vs. TRF+AT       | -0.6086    | -1.181 to -0.03588 | Yes          | *       |
| TRF vs. TRF+RT       | 0.2112     | -0.3614 to 0.7839  | No           | ns      |
| TRF vs. TRF+CT       | -0.2092    | -0.7819 to 0.3634  | No           | ns      |
| TRF+AT vs. TRF+RT    | 0.8198     | 0.2471 to 1.392    | Yes          | **      |
| TRF+AT vs. TRF+CT    | 0.3993     | -0.1734 to 0.9720  | No           | ns      |
| TRF+RT vs. TRF+CT    | -0.4205    | -0.9931 to 0.1522  | No           | ns      |

# Figure 8

C.

## Fatty Acid Oxidation Genes

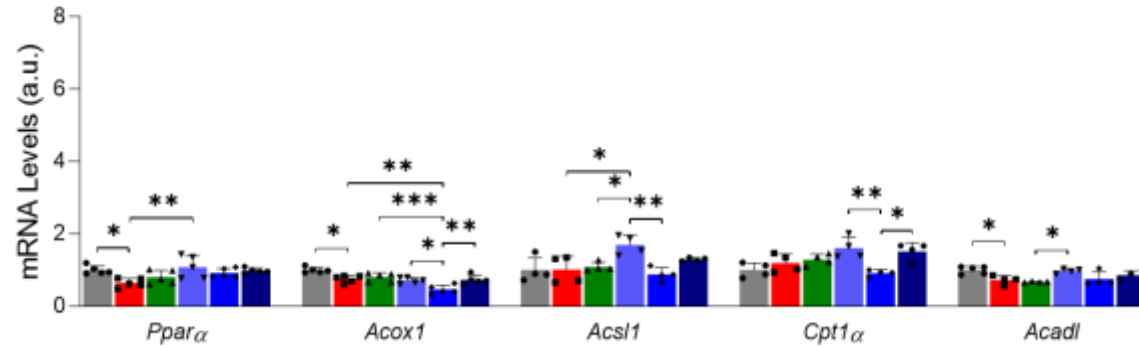

### Ordinary one-way ANOVA ANOVA results

### *Cpt1α*

| Tukey's multiple com | Mean Diff. | 95.00% CI of diff. | Significant? | Summary |
|----------------------|------------|--------------------|--------------|---------|
| CTL vs. OB           | -0.1939    | -0.6891 to 0.3013  | No           | ns      |
| CTL vs. TRF          | -0.2877    | -0.7829 to 0.2076  | No           | ns      |
| CTL vs. TRF+AT       | -0.6126    | -1.108 to -0.1173  | Yes          | *       |
| CTL vs. TRF+RT       | 0.08756    | -0.4077 to 0.5828  | No           | ns      |
| CTL vs. TRF+CT       | -0.5200    | -1.015 to -0.02477 | Yes          | *       |
| OB vs. TRF           | -0.09376   | -0.5890 to 0.4015  | No           | ns      |
| OB vs. TRF+AT        | -0.4187    | -0.9139 to 0.07655 | No           | ns      |
| OB vs. TRF+RT        | 0.2815     | -0.2138 to 0.7767  | No           | ns      |
| OB vs. TRF+CT        | -0.3261    | -0.8213 to 0.1691  | No           | ns      |
| TRF vs. TRF+AT       | -0.3249    | -0.8201 to 0.1703  | No           | ns      |
| TRF vs. TRF+RT       | 0.3752     | -0.1200 to 0.8704  | No           | ns      |
| TRF vs. TRF+CT       | -0.2323    | -0.7275 to 0.2629  | No           | ns      |
| TRF+AT vs. TRF+RT    | 0.7001     | 0.2049 to 1.195    | Yes          | **      |
| TRF+AT vs. TRF+CT    | 0.09258    | -0.4026 to 0.5878  | No           | ns      |
| TRF+RT vs. TRF+CT    | -0.6075    | -1.103 to -0.1123  | Yes          | *       |

### Ordinary one-way ANOVA ANOVA results

### *Acadl*

| Tukey's multiple com | Mean Diff. | 95.00% CI of diff.  | Significant? | Summary |
|----------------------|------------|---------------------|--------------|---------|
| CTL vs. OB           | 0.2772     | 0.02672 to 0.5277   | Yes          | *       |
| CTL vs. TRF          | 0.3281     | 0.07763 to 0.5787   | Yes          | **      |
| CTL vs. TRF+AT       | 0.02272    | -0.2278 to 0.2732   | No           | ns      |
| CTL vs. TRF+RT       | 0.2494     | -0.001088 to 0.4999 | No           | ns      |
| CTL vs. TRF+CT       | 0.1436     | -0.1069 to 0.3942   | No           | ns      |
| OB vs. TRF           | 0.05091    | -0.2132 to 0.3150   | No           | ns      |
| OB vs. TRF+AT        | -0.2545    | -0.5186 to 0.009549 | No           | ns      |
| OB vs. TRF+RT        | -0.02781   | -0.2919 to 0.2363   | No           | ns      |
| OB vs. TRF+CT        | -0.1336    | -0.3977 to 0.1305   | No           | ns      |
| TRF vs. TRF+AT       | -0.3054    | -0.5695 to -0.04136 | Yes          | *       |
| TRF vs. TRF+RT       | -0.07872   | -0.3428 to 0.1853   | No           | ns      |
| TRF vs. TRF+CT       | -0.1845    | -0.4486 to 0.07956  | No           | ns      |
| TRF+AT vs. TRF+RT    | 0.2267     | -0.03736 to 0.4908  | No           | ns      |
| TRF+AT vs. TRF+CT    | 0.1209     | -0.1431 to 0.3850   | No           | ns      |
| TRF+RT vs. TRF+CT    | -0.1058    | -0.3698 to 0.1583   | No           | ns      |



# Figure S1

## A. Exhaustion Velocity

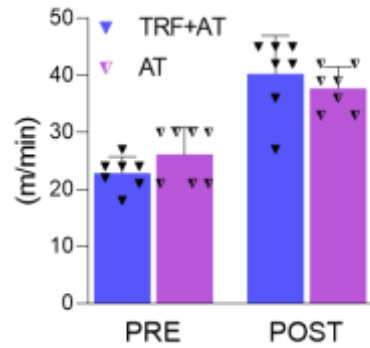

| Grouped |   | TRF+AT |      |      |      |      |      |      |
|---------|---|--------|------|------|------|------|------|------|
|         | ✕ | A:1    | A:2  | A:3  | A:4  | A:5  | A:6  | A:7  |
| PRE     |   | 22.0   | 18.0 | 21.0 | 24.0 | 24.0 | 24.0 | 27.0 |
| POST    |   | 45.0   | 45.0 | 36.0 | 45.0 | 27.0 | 42.0 | 42.0 |

| Grouped |   | AT  |     |     |     |     |     |     |
|---------|---|-----|-----|-----|-----|-----|-----|-----|
|         | ✕ | B:1 | B:2 | B:3 | B:4 | B:5 | B:6 | B:7 |
| PRE     |   | 30  | 30  | 21  | 30  | 21  | 30  | 21  |
| POST    |   | 42  | 39  | 33  | 39  | 36  | 42  | 33  |

| Shapiro-Wilk test     |             |             |
|-----------------------|-------------|-------------|
| W                     | N too small | N too small |
| P value               |             |             |
| Passed normality test |             |             |
| P value summary       |             |             |

| 2way ANOVA           |            |                    |              |         |
|----------------------|------------|--------------------|--------------|---------|
| Multiple comparisons |            |                    |              |         |
| Sidak's multipl      | Mean Diff. | 95.00% CI of diff. | Significant? | Summary |
| TRF+AT - AT          |            |                    |              |         |
| PRE                  | -3.286     | -9.347 to 2.776    | No           | ns      |
| POST                 | 2.571      | -3.490 to 8.633    | No           | ns      |

## B. Exhaustion Velocity

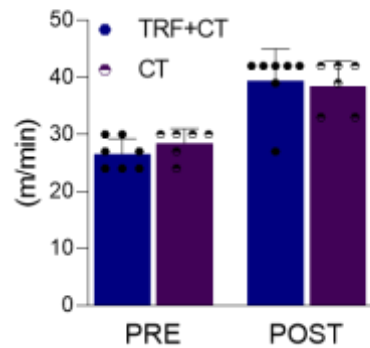

| Grouped |   | TRF+CT |     |     |     |     |     |     |
|---------|---|--------|-----|-----|-----|-----|-----|-----|
|         | ✕ | A:1    | A:2 | A:3 | A:4 | A:5 | A:6 | A:7 |
| PRE     |   | 27     | 27  | 30  | 30  | 24  | 24  | 24  |
| POST    |   | 42     | 42  | 42  | 42  | 42  | 27  | 39  |

| Grouped |   | CT  |     |     |     |     |     |     |
|---------|---|-----|-----|-----|-----|-----|-----|-----|
|         | ✕ | B:1 | B:2 | B:3 | B:4 | B:5 | B:6 | B:7 |
| PRE     |   | 27  | 24  | 30  | 30  | 30  | 30  |     |
| POST    |   | 33  | 33  | 39  | 42  | 42  | 42  |     |

| Shapiro-Wilk test |             |             |
|-------------------|-------------|-------------|
| W                 | N too small | N too small |
| P value           |             |             |
| Passed normality  |             |             |
| P value summary   |             |             |

| 2way ANOVA           |            |                    |              |         |
|----------------------|------------|--------------------|--------------|---------|
| Multiple comparisons |            |                    |              |         |
| Sidak's multipl      | Mean Diff. | 95.00% CI of diff. | Significant? | Summary |
| TRF+CT - CT          |            |                    |              |         |
| PRE                  | -1.929     | -7.332 to 3.475    | No           | ns      |
| POST                 | 0.9286     | -4.475 to 6.332    | No           | ns      |

# Figure S1

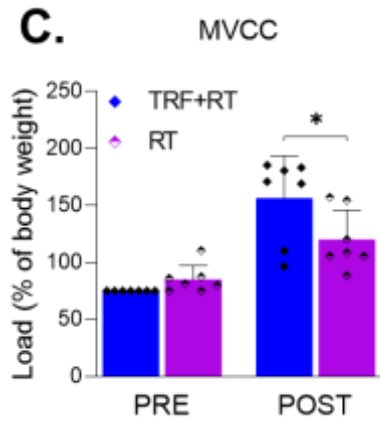

| Grouped |   | TRF+RT      |             |             |             |             |             |             |
|---------|---|-------------|-------------|-------------|-------------|-------------|-------------|-------------|
|         | ✕ | A:1         | A:2         | A:3         | A:4         | A:5         | A:6         | A:7         |
| PRE     |   | 75.00000000 | 75.00000000 | 75.00000000 | 75.00000000 | 75.00000000 | 75.00000000 | 75.00000000 |
| POST    |   | 96.51308713 | 185.2181401 | 183.2802548 | 180.5555556 | 110.4121582 | 170.9488273 | 169.0438871 |

| Grouped |   | RT          |             |             |             |             |             |             |
|---------|---|-------------|-------------|-------------|-------------|-------------|-------------|-------------|
|         | ✕ | B:1         | B:2         | B:3         | B:4         | B:5         | B:6         | B:7         |
| PRE     |   | 87.57071025 | 79.9652433  | 86.22124556 | 75.00000000 | 75.00000000 | 110.6040826 | 81.40341515 |
| POST    |   | 157.2669104 | 105.5395317 | 108.7394564 | 154.3973941 | 88.49325337 | 105.5810398 | 120.2879017 |

| Shapiro-Wilk test |             |             |
|-------------------|-------------|-------------|
| W                 | N too small | N too small |
| P value           |             |             |
| Passed normality  |             |             |
| P value summary   |             |             |

## 2way ANOVA

### Multiple comparisons

| Sidak's multip | Mean Diff. | 95.00% CI of diff. | Significant? | Summary |
|----------------|------------|--------------------|--------------|---------|
| TRF+RT - RT    |            |                    |              |         |
| PRE            | -10.11     | -40.03 to 19.81    | No           | ns      |
| POST           | 36.52      | 6.603 to 66.45     | Yes          | *       |

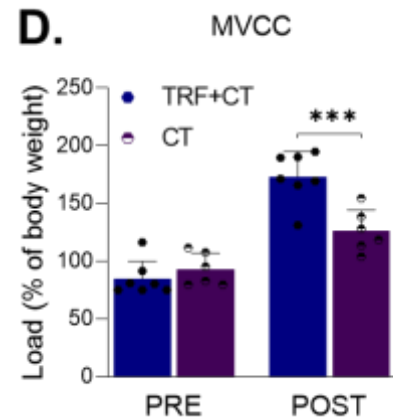

| Grouped |   | TRF+CT      |             |             |             |             |             |             |
|---------|---|-------------|-------------|-------------|-------------|-------------|-------------|-------------|
|         | ✕ | A:1         | A:2         | A:3         | A:4         | A:5         | A:6         | A:7         |
| PRE     |   | 80.26685393 | 75.00000000 | 91.47748078 | 116.3721772 | 75.00000000 | 75.00000000 | 80.90086546 |
| POST    |   | 171.2962963 | 131.1330561 | 194.8934281 | 189.6419952 | 190.2802893 | 169.4881890 | 166.0010111 |

| Grouped |   | CT          |             |             |             |             |             |     |
|---------|---|-------------|-------------|-------------|-------------|-------------|-------------|-----|
|         | ✕ | B:1         | B:2         | B:3         | B:4         | B:5         | B:6         | B:7 |
| PRE     |   | 79.68018721 | 79.76947536 | 82.87608296 | 111.6121552 | 95.34358047 | 107.5379610 |     |
| POST    |   | 103.8507774 | 118.5132957 | 113.4615385 | 138.4081902 | 127.9450695 | 154.4176042 |     |

| Shapiro-Wilk test |             |             |
|-------------------|-------------|-------------|
| W                 | N too small | N too small |
| P value           |             |             |
| Passed normality  |             |             |
| P value summary   |             |             |

## 2way ANOVA

### Multiple comparisons

| Sidak's multip | Mean Diff. | 95.00% CI of diff. | Significant? | Summary |
|----------------|------------|--------------------|--------------|---------|
| TRF+CT - CT    |            |                    |              |         |
| PRE            | -7.944     | -31.63 to 15.74    | No           | ns      |
| POST           | 47.15      | 23.47 to 70.83     | Yes          | ***     |

# Figure S1

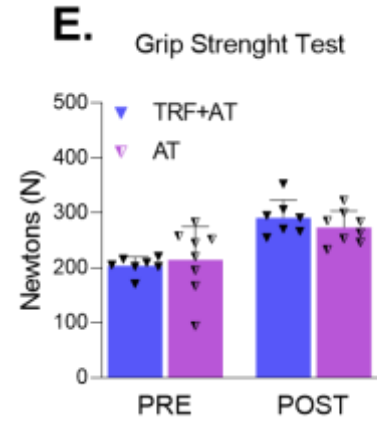

| Grouped |   | TRF+TA  |          |          |          |          |          |          |     |
|---------|---|---------|----------|----------|----------|----------|----------|----------|-----|
|         | x | A:1     | A:2      | A:3      | A:4      | A:5      | A:6      | A:7      | A:8 |
| PRE     |   | 209.333 | 220.6670 | 215.6670 | 202.3330 | 205.0000 | 170.6670 | 202.3330 |     |
| POST    |   | 291.000 | 266.3333 | 352.6667 | 270.6667 | 295.0000 | 254.6667 | 306.0000 |     |

| Grouped |   | TA       |          |          |          |          |          |          |          |
|---------|---|----------|----------|----------|----------|----------|----------|----------|----------|
|         | x | B:1      | B:2      | B:3      | B:4      | B:5      | B:6      | B:7      | B:8      |
| PRE     |   | 220.0000 | 166.6670 | 283.0000 | 195.3330 | 251.6670 | 257.6670 | 94.3333  | 245.3330 |
| POST    |   | 285.6667 | 246.0000 | 300.3333 | 264.0000 | 253.3333 | 284.0000 | 322.6667 | 233.3333 |

| Shapiro-Wilk test |             |             |
|-------------------|-------------|-------------|
| W                 | N too small | N too small |
| P value           |             |             |
| Passed normality  |             |             |
| P value summary   |             |             |

## 2way ANOVA Multiple comparisons

| Sidak's multiple | Mean Diff. | 95.00% CI of diff. | Significant? | Summary |
|------------------|------------|--------------------|--------------|---------|
| TRF+TA - TA      |            |                    |              |         |
| PRE              | -10.54     | -58.84 to 37.77    | No           | ns      |
| POST             | 17.24      | -31.07 to 65.54    | No           | ns      |

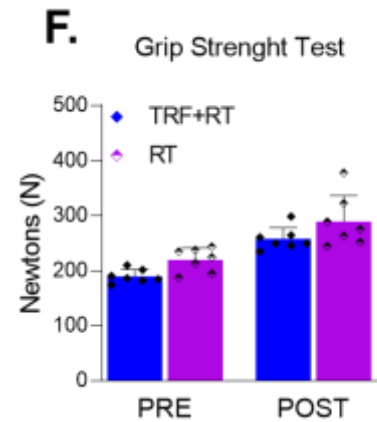

| Grouped |   | TRF+RT   |          |          |          |          |          |          |
|---------|---|----------|----------|----------|----------|----------|----------|----------|
|         | x | A:1      | A:2      | A:3      | A:4      | A:5      | A:6      | A:7      |
| PRE     |   | 184.3330 | 174.0000 | 201.3330 | 209.6670 | 186.0000 | 182.0000 | 190.3330 |
| POST    |   | 245.6667 | 264.3333 | 235.0000 | 249.3333 | 249.3333 | 260.6667 | 298.6667 |

| Grouped |   | RT      |          |         |          |          |          |          |
|---------|---|---------|----------|---------|----------|----------|----------|----------|
|         | x | B:1     | B:2      | B:3     | B:4      | B:5      | B:6      | B:7      |
| PRE     |   | 187.333 | 237.6670 | 243.667 | 194.3330 | 213.6670 | 234.6670 | 224.3330 |
| POST    |   | 263.000 | 289.3333 | 378.000 | 251.6667 | 275.6667 | 244.3333 | 322.6667 |

| Shapiro-Wilk test  |             |             |
|--------------------|-------------|-------------|
| W                  | N too small | N too small |
| P value            |             |             |
| Passed normality t |             |             |
| P value summary    |             |             |

## 2way ANOVA Multiple comparisons

| Sidak's multip | Mean Diff. | 95.00% CI of diff. | Significant? | Summary |
|----------------|------------|--------------------|--------------|---------|
| TRF+RT - RT    |            |                    |              |         |
| PRE            | -29.71     | -66.13 to 6.700    | No           | ns      |
| POST           | -31.67     | -68.08 to 4.748    | No           | ns      |

# Figure S1

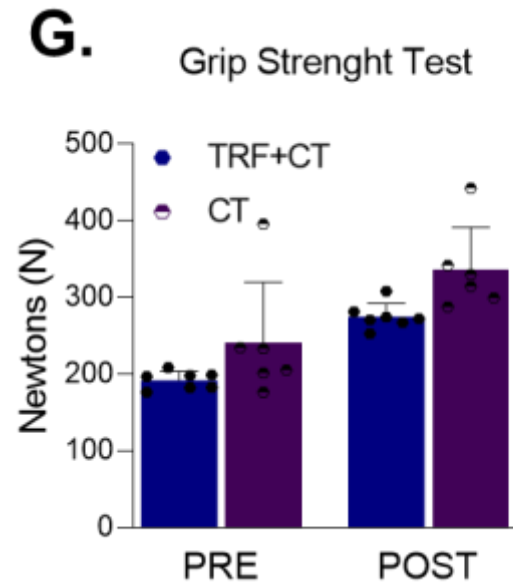

| Grouped      | TRF+CT   |          |          |          |          |          |          |
|--------------|----------|----------|----------|----------|----------|----------|----------|
| <div>⊗</div> | A:1      | A:2      | A:3      | A:4      | A:5      | A:6      | A:7      |
| PRE          | 198.0000 | 199.0000 | 208.6670 | 176.3330 | 197.0000 | 182.3330 | 182.6670 |
| POST         | 267.3333 | 308.0000 | 270.6667 | 252.6667 | 272.3333 | 274.3333 | 281.3333 |

| Grouped      | CT       |          |          |          |          |          |     |
|--------------|----------|----------|----------|----------|----------|----------|-----|
| <div>⊗</div> | B:1      | B:2      | B:3      | B:4      | B:5      | B:6      | B:7 |
| PRE          | 395.6670 | 205.3330 | 176.3330 | 234.3330 | 201.3330 | 233.3330 |     |
| POST         | 314.3333 | 329.6667 | 299.3333 | 342.0000 | 287.6667 | 442.3333 |     |

| Shapiro-Wilk test                   |             |             |
|-------------------------------------|-------------|-------------|
| W                                   | N too small | N too small |
| P value                             |             |             |
| Passed normality test (alpha=0.05)? |             |             |
| P value summary                     |             |             |

| 2way ANOVA                        |            |                    |              |         |
|-----------------------------------|------------|--------------------|--------------|---------|
| Multiple comparisons              |            |                    |              |         |
| Sidak's multiple comparisons test | Mean Diff. | 95.00% CI of diff. | Significant? | Summary |
| TRF+CT - CT                       |            |                    |              |         |
| PRE                               | -49.06     | -112.1 to 14.02    | No           | ns      |
| POST                              | -60.65     | -123.7 to 2.424    | No           | ns      |



# Figure S2

**A.**

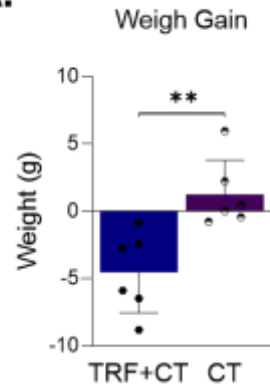

| TRF+CT | CT    |
|--------|-------|
| -2.77  | -0.76 |
| -5.90  | 0.01  |
| -8.81  | 2.23  |
| -2.44  | -0.43 |
| -0.88  | 5.97  |
| -6.48  | 0.47  |

| Shapiro-Wilk test |        |        |
|-------------------|--------|--------|
| W                 | 0.9460 | 0.8112 |
| P value           | 0.7082 | 0.0739 |
| Passed normality  | Yes    | Yes    |
| P value summary   | ns     | ns     |

| Unpaired t test                     |                |
|-------------------------------------|----------------|
| P value                             | 0.0047         |
| P value summary                     | **             |
| Significantly different (P < 0.05)? | Yes            |
| One- or two-tailed P value?         | Two-tailed     |
| t, df                               | t=3.616, df=10 |

**B.**

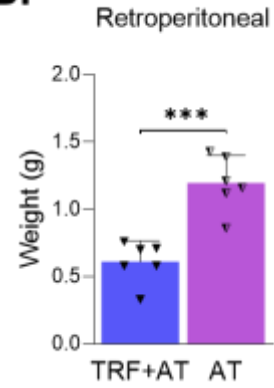

| TRF+AT | AT   |
|--------|------|
| 0.33   | 1.12 |
| 0.76   | 0.86 |
| 0.71   | 1.39 |
| 0.58   | 1.43 |
| 0.58   | 1.21 |
| 0.70   | 1.16 |

| Shapiro-Wilk test |        |        |
|-------------------|--------|--------|
| W                 | 0.8667 | 0.9388 |
| P value           | 0.2132 | 0.6495 |
| Passed normality  | Yes    | Yes    |
| P value summary   | ns     | ns     |

| Unpaired t test                     |                |
|-------------------------------------|----------------|
| P value                             | 0.0002         |
| P value summary                     | ***            |
| Significantly different (P < 0.05)? | Yes            |
| One- or two-tailed P value?         | Two-tailed     |
| t, df                               | t=5.550, df=10 |

**C.**

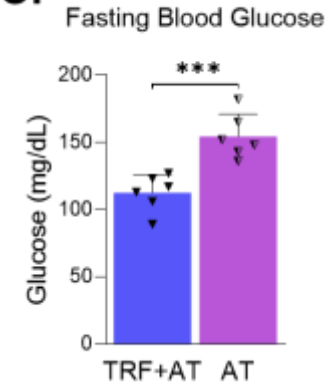

| TRF+AT | AT  |
|--------|-----|
| 89     | 152 |
| 106    | 143 |
| 127    | 148 |
| 113    | 165 |
| 117    | 182 |
| 123    | 136 |

| Shapiro-Wilk test     |        |        |
|-----------------------|--------|--------|
| W                     | 0.9339 | 0.9383 |
| P value               | 0.6107 | 0.6455 |
| Passed normality test | Yes    | Yes    |
| P value summary       | ns     | ns     |

| Unpaired t test                     |                |
|-------------------------------------|----------------|
| P value                             | 0.0008         |
| P value summary                     | ***            |
| Significantly different (P < 0.05)? | Yes            |
| One- or two-tailed P value?         | Two-tailed     |
| t, df                               | t=4.752, df=10 |

# Figure S2

**D.**

Fasting Blood Glucose

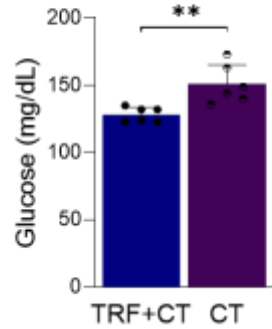

| TRF+CT        | CT         |
|---------------|------------|
| 123.000000000 | 173.000000 |
| 132.000000000 | 149.000000 |
| 135.000000000 | 140.000000 |
| 124.000000000 | 136.000000 |
| 132.000000000 | 144.000000 |
| 123.000000000 | 163.000000 |

| Shapiro-Wilk test     |        |        |
|-----------------------|--------|--------|
| W                     | 0.8163 | 0.9171 |
| P value               | 0.0820 | 0.4849 |
| Passed normality test | Yes    | Yes    |
| P value summary       | ns     | ns     |

| Unpaired t test                     |                |
|-------------------------------------|----------------|
| P value                             | 0.0047         |
| P value summary                     | **             |
| Significantly different (P < 0.05)? | Yes            |
| One- or two-tailed P value?         | Two-tailed     |
| t, df                               | t=3.624, df=10 |

**E.**

Postprandial Blood Glucose

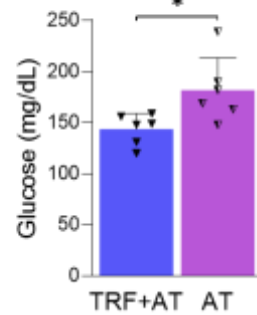

| TRF+AT | AT  |
|--------|-----|
| 131    | 163 |
| 148    | 169 |
| 120    | 190 |
| 149    | 148 |
| 156    | 182 |
| 159    | 239 |

| Shapiro-Wilk test     |        |        |
|-----------------------|--------|--------|
| W                     | 0.8968 | 0.9044 |
| P value               | 0.3555 | 0.4004 |
| Passed normality test | Yes    | Yes    |
| P value summary       | ns     | ns     |

| Unpaired t test                     |                |
|-------------------------------------|----------------|
| P value                             | 0.0242         |
| P value summary                     | *              |
| Significantly different (P < 0.05)? | Yes            |
| One- or two-tailed P value?         | Two-tailed     |
| t, df                               | t=2.653, df=10 |

**F.**

Postprandial Blood Glucose

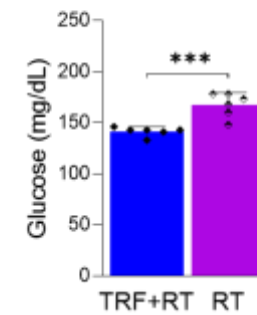

| TRF+RT | RT  |
|--------|-----|
| 143    | 160 |
| 133    | 178 |
| 143    | 148 |
| 143    | 178 |
| 146    | 173 |
| 141    | 168 |

| Shapiro-Wilk test     |        |        |
|-----------------------|--------|--------|
| W                     | 0.7997 | 0.8934 |
| P value               | 0.0584 | 0.3364 |
| Passed normality test | Yes    | Yes    |
| P value summary       | ns     | ns     |

| Unpaired t test                     |                |
|-------------------------------------|----------------|
| P value                             | 0.0005         |
| P value summary                     | ***            |
| Significantly different (P < 0.05)? | Yes            |
| One- or two-tailed P value?         | Two-tailed     |
| t, df                               | t=5.076, df=10 |

Figure S2

G.

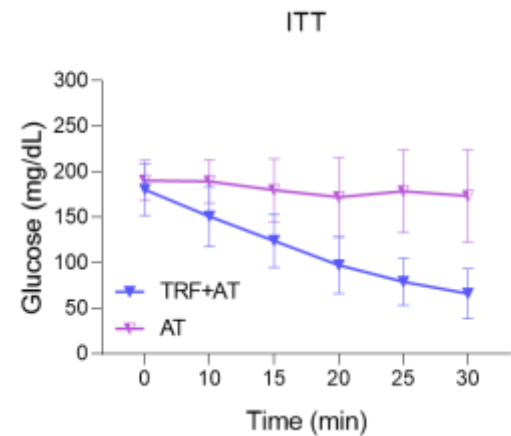

H.

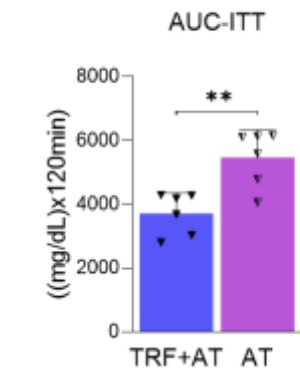

| TRF+AT | AT     |
|--------|--------|
| 2802.5 | 4050.0 |
| 4285.0 | 6142.5 |
| 4175.0 | 5580.0 |
| 3682.5 | 6105.0 |
| 4270.0 | 4785.0 |
| 3025.0 | 6125.0 |

| Shapiro-Wilk test                   |        |        |
|-------------------------------------|--------|--------|
| W                                   | 0.8413 | 0.8264 |
| P value                             | 0.1337 | 0.1002 |
| Passed normality test (alpha=0.05)? | Yes    | Yes    |
| P value summary                     | ns     | ns     |

| Unpaired t test                     |                |
|-------------------------------------|----------------|
| P value                             | 0.0027         |
| P value summary                     | **             |
| Significantly different (P < 0.05)? | Yes            |
| One- or two-tailed P value?         | Two-tailed     |
| t, df                               | t=3.952, df=10 |

| XY |    | X Title | TRF+AT |      |      |      |      |      |
|----|----|---------|--------|------|------|------|------|------|
|    | X  | X       | A:Y1   | A:Y2 | A:Y3 | A:Y4 | A:Y5 | A:Y6 |
| 1  | 0  |         | 181    | 159  | 186  | 176  | 231  | 150  |
| 2  | 10 |         | 111    | 146  | 169  | 159  | 200  | 121  |
| 3  | 15 |         | 104    | 163  | 155  | 118  | 118  | 88   |
| 4  | 20 |         | 51     | 137  | 126  | 97   | 91   | 83   |
| 5  | 25 |         | 43     | 123  | 86   | 78   | 75   | 71   |
| 6  | 30 |         | 30     | 112  | 57   | 58   | 78   | 63   |

| XY |    | X Title | AT   |      |      |      |      |      |
|----|----|---------|------|------|------|------|------|------|
|    | X  | X       | B:Y1 | B:Y2 | B:Y3 | B:Y4 | B:Y5 | B:Y6 |
| 1  | 0  |         | 191  | 155  | 178  | 205  | 196  | 219  |
| 2  | 10 |         | 160  | 198  | 184  | 214  | 166  | 215  |
| 3  | 15 |         | 124  | 202  | 197  | 205  | 150  | 202  |
| 4  | 20 |         | 102  | 221  | 187  | 194  | 139  | 191  |
| 5  | 25 |         | 103  | 231  | 197  | 204  | 151  | 187  |
| 6  | 30 |         | 100  | 245  | 162  | 184  | 144  | 207  |

# Figure S3

**B.**

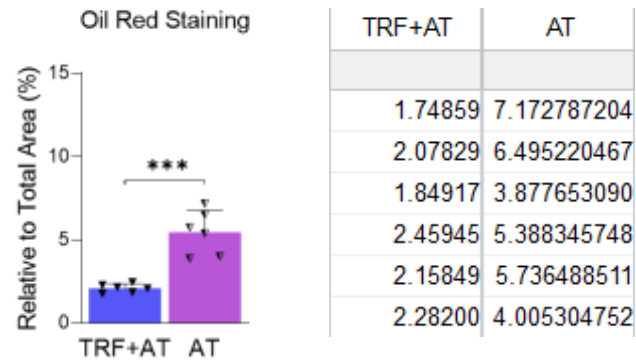

| Shapiro-Wilk test     |        |        |
|-----------------------|--------|--------|
| W                     | 0.9729 | 0.9319 |
| P value               | 0.9113 | 0.5951 |
| Passed normality test | Yes    | Yes    |
| P value summary       | ns     | ns     |

| Unpaired t test                     |                |
|-------------------------------------|----------------|
| P value                             | 0.0001         |
| P value summary                     | ***            |
| Significantly different (P < 0.05)? | Yes            |
| One- or two-tailed P value?         | Two-tailed     |
| t, df                               | t=6.096, df=10 |

**C.**

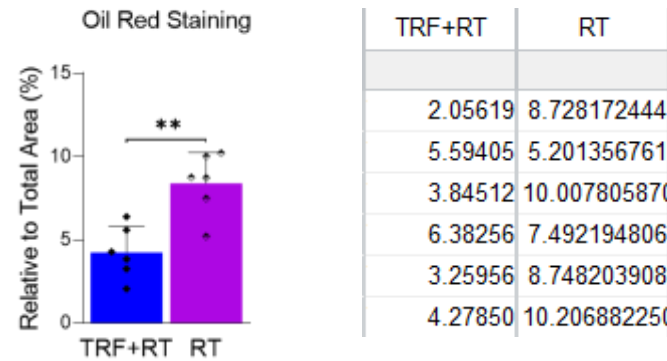

| Shapiro-Wilk test     |        |        |
|-----------------------|--------|--------|
| W                     | 0.9810 | 0.8997 |
| P value               | 0.9564 | 0.3723 |
| Passed normality test | Yes    | Yes    |
| P value summary       | ns     | ns     |

| Unpaired t test                     |            |
|-------------------------------------|------------|
| P value                             | 0.0018     |
| P value summary                     | **         |
| Significantly different (P < 0.05)? | Yes        |
| One- or two-tailed P value?         | Two-tailed |

**D.**

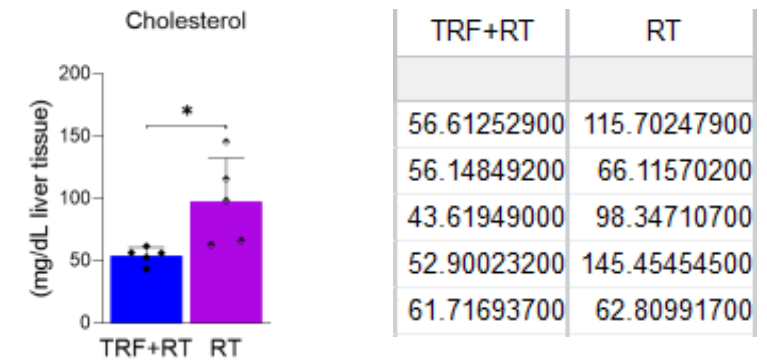

| Shapiro-Wilk test     |        |        |
|-----------------------|--------|--------|
| W                     | 0.9292 | 0.9285 |
| P value               | 0.5911 | 0.5861 |
| Passed normality test | Yes    | Yes    |
| P value summary       | ns     | ns     |

| Unpaired t test                     |               |
|-------------------------------------|---------------|
| P value                             | 0.0250        |
| P value summary                     | *             |
| Significantly different (P < 0.05)? | Yes           |
| One- or two-tailed P value?         | Two-tailed    |
| t, df                               | t=2.750, df=8 |



# Figure S3

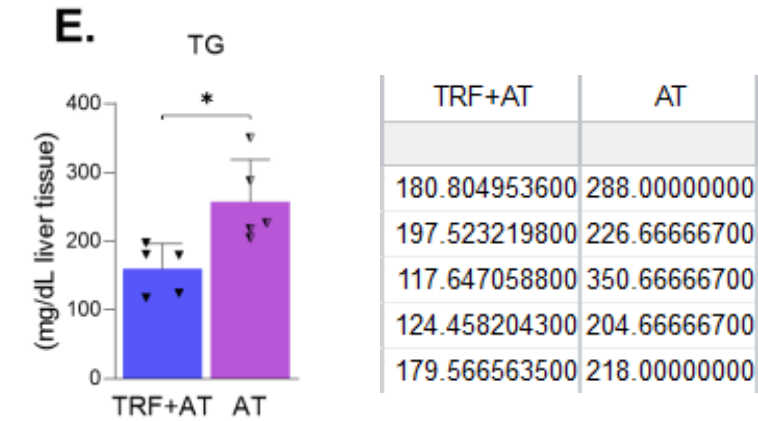

| Shapiro-Wilk test     |        |        |
|-----------------------|--------|--------|
| W                     | 0.8422 | 0.8705 |
| P value               | 0.1711 | 0.2683 |
| Passed normality test | Yes    | Yes    |
| P value summary       | ns     | ns     |

| Unpaired t test                     |               |
|-------------------------------------|---------------|
| P value                             | 0.0153        |
| P value summary                     | *             |
| Significantly different (P < 0.05)? | Yes           |
| One- or two-tailed P value?         | Two-tailed    |
| t, df                               | t=3.072, df=8 |

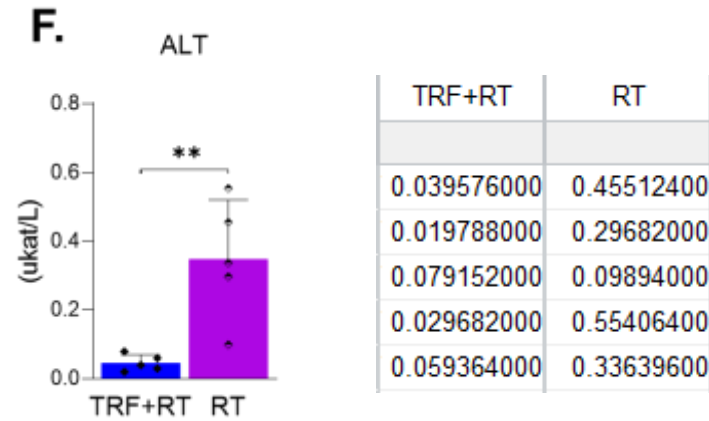

| Shapiro-Wilk test     |        |        |
|-----------------------|--------|--------|
| W                     | 0.9570 | 0.9777 |
| P value               | 0.7869 | 0.9221 |
| Passed normality test | Yes    | Yes    |
| P value summary       | ns     | ns     |

| Unpaired t test                     |               |
|-------------------------------------|---------------|
| P value                             | 0.0046        |
| P value summary                     | **            |
| Significantly different (P < 0.05)? | Yes           |
| One- or two-tailed P value?         | Two-tailed    |
| t, df                               | t=3.892, df=8 |

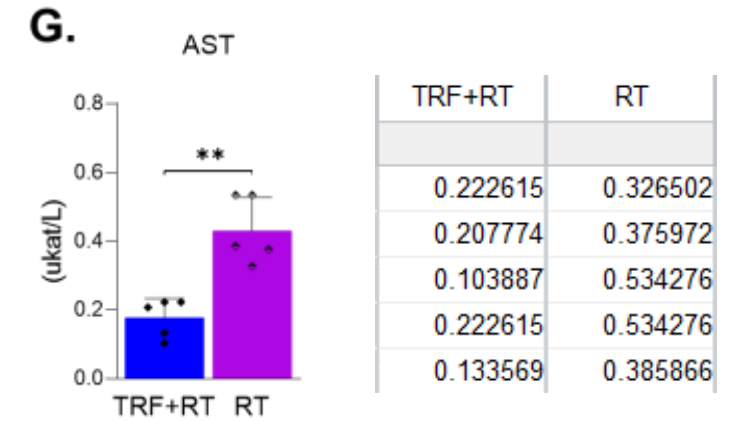

| Shapiro-Wilk test     |        |        |
|-----------------------|--------|--------|
| W                     | 0.8173 | 0.8330 |
| P value               | 0.1113 | 0.1464 |
| Passed normality test | Yes    | Yes    |
| P value summary       | ns     | ns     |

| Unpaired t test                     |               |
|-------------------------------------|---------------|
| P value                             | 0.0009        |
| P value summary                     | ***           |
| Significantly different (P < 0.05)? | Yes           |
| One- or two-tailed P value?         | Two-tailed    |
| t, df                               | t=5.084, df=8 |
